# Supplementary material for: Assessment of breath volatile organic compounds in acute cardiorespiratory breathlessness: a protocol describing a prospective real-world observational study
Source: PubMed Central journal article supplement (PMC6429860; doi:10.1136/bmjopen-2018-025486), 2019-03-08
Supplement: bmjopen-2018-025486.draft_revisions.pdf [file bmjopen-2018-025486.draft_revisions.pdf]

# BMJ Open

BMJ Open is committed to open peer review. As part of this commitment we make the peer review history of every article we publish publicly available.

When an article is published we post the peer reviewers' comments and the authors' responses online. We also post the versions of the paper that were used during peer review. These are the versions that the peer review comments apply to.

The versions of the paper that follow are the versions that were submitted during the peer review process. They are not the versions of record or the final published versions. They should not be cited or distributed as the published version of this manuscript.

BMJ Open is an open access journal and the full, final, typeset and author-corrected version of record of the manuscript is available on our site with no access controls, subscription charges or pay-per-view fees (<http://bmjopen.bmj.com>).

If you have any questions on BMJ Open's open peer review process please email [info.bmjopen@bmj.com](mailto:info.bmjopen@bmj.com)

# BMJ Open

## Assessment of Breath Volatile Organic Compounds in Acute Cardio-respiratory Breathlessness: A Prospective Real World Observational Study

|                               |                                                                                                                                                                                                                                                                                                                                                                                                                                                                                                                                                                                                                                                                                                                                                                                                                                                                                                                                                                                                                                                                                                                                                                                                                                                                                                                                                                                                                                                                                                                                                                                                                                                                                                                                                                                                                                                                                                                                                                                                                                                                                                                                                                                                                                                                                                                                                                                                                                                                                                                                                                                                                                     |
|-------------------------------|-------------------------------------------------------------------------------------------------------------------------------------------------------------------------------------------------------------------------------------------------------------------------------------------------------------------------------------------------------------------------------------------------------------------------------------------------------------------------------------------------------------------------------------------------------------------------------------------------------------------------------------------------------------------------------------------------------------------------------------------------------------------------------------------------------------------------------------------------------------------------------------------------------------------------------------------------------------------------------------------------------------------------------------------------------------------------------------------------------------------------------------------------------------------------------------------------------------------------------------------------------------------------------------------------------------------------------------------------------------------------------------------------------------------------------------------------------------------------------------------------------------------------------------------------------------------------------------------------------------------------------------------------------------------------------------------------------------------------------------------------------------------------------------------------------------------------------------------------------------------------------------------------------------------------------------------------------------------------------------------------------------------------------------------------------------------------------------------------------------------------------------------------------------------------------------------------------------------------------------------------------------------------------------------------------------------------------------------------------------------------------------------------------------------------------------------------------------------------------------------------------------------------------------------------------------------------------------------------------------------------------------|
| Journal:                      | <i>BMJ Open</i>                                                                                                                                                                                                                                                                                                                                                                                                                                                                                                                                                                                                                                                                                                                                                                                                                                                                                                                                                                                                                                                                                                                                                                                                                                                                                                                                                                                                                                                                                                                                                                                                                                                                                                                                                                                                                                                                                                                                                                                                                                                                                                                                                                                                                                                                                                                                                                                                                                                                                                                                                                                                                     |
| Manuscript ID                 | bmjopen-2018-025486                                                                                                                                                                                                                                                                                                                                                                                                                                                                                                                                                                                                                                                                                                                                                                                                                                                                                                                                                                                                                                                                                                                                                                                                                                                                                                                                                                                                                                                                                                                                                                                                                                                                                                                                                                                                                                                                                                                                                                                                                                                                                                                                                                                                                                                                                                                                                                                                                                                                                                                                                                                                                 |
| Article Type:                 | Protocol                                                                                                                                                                                                                                                                                                                                                                                                                                                                                                                                                                                                                                                                                                                                                                                                                                                                                                                                                                                                                                                                                                                                                                                                                                                                                                                                                                                                                                                                                                                                                                                                                                                                                                                                                                                                                                                                                                                                                                                                                                                                                                                                                                                                                                                                                                                                                                                                                                                                                                                                                                                                                            |
| Date Submitted by the Author: | 17-Jul-2018                                                                                                                                                                                                                                                                                                                                                                                                                                                                                                                                                                                                                                                                                                                                                                                                                                                                                                                                                                                                                                                                                                                                                                                                                                                                                                                                                                                                                                                                                                                                                                                                                                                                                                                                                                                                                                                                                                                                                                                                                                                                                                                                                                                                                                                                                                                                                                                                                                                                                                                                                                                                                         |
| Complete List of Authors:     | <p>Ibrahim, Wadah; Leicester NIHR Biomedical Research Centre (Respiratory theme); College of Life Sciences, Department of Infection, Immunity and Inflammation, University of Leicester</p> <p>Wilde, Michael; University of Leicester, Department of Chemistry</p> <p>Cordell, Rebecca; University of Leicester, Department of Chemistry</p> <p>Salman, Dahlia; Loughborough University, Department of Chemistry</p> <p>Ruszkiewicz, Dorota; Loughborough University, Department of Chemistry</p> <p>Bryant, Luke; University of Leicester, Department of Chemistry</p> <p>Richardson, Matthew; Leicester NIHR Biomedical Research Centre (Respiratory theme); University of Leicester, Infection, Inflammation and Immunity</p> <p>Free, Robert; Leicester NIHR Biomedical Research Centre (Respiratory theme); University of Leicester, Infection, Inflammation and Immunity</p> <p>Zhao, Bo; Leicester NIHR Biomedical Research Centre (Respiratory theme); University of Leicester, Infection, Inflammation and Immunity</p> <p>Yousuf, Ahmed; University of Leicester, Infection, Inflammation and Immunity; Leicester NIHR Biomedical Research Centre (Respiratory theme)</p> <p>White, Christobelle; University of Leicester, Infection, Inflammation and Immunity; Leicester NIHR Biomedical Research Centre (Respiratory theme)</p> <p>Russell, Richard; University of Leicester, Infection, Inflammation and Immunity; Leicester NIHR Biomedical Research Centre (Respiratory theme)</p> <p>Jones, Sheila; University Hospitals of Leicester NHS Trust</p> <p>Patel, Bharti; University Hospitals of Leicester NHS Trust</p> <p>Awal, Asia; University Hospitals of Leicester NHS Trust</p> <p>Phillips, Rachael; NIHR Leicester Clinical Research Facility</p> <p>Fowkes, Graham; NIHR Leicester Clinical Research Facility</p> <p>McNally, Teresa; Paediatric Clinical Investigation Centre</p> <p>Foxon, Clare; Paediatric Clinical Investigation Centre</p> <p>Bhatt, Hetan; Leicester NIHR Biomedical Research Centre (Respiratory theme)</p> <p>Peltrini, Rosa; Leicester NIHR Biomedical Research Centre (Respiratory theme); University of Leicester, Department Infection, Inflammation and Immunity</p> <p>Singapuri, Amisha; Leicester NIHR Biomedical Research Centre (Respiratory theme)</p> <p>Hargadon, Beverley; Leicester NIHR Biomedical Research Centre (Respiratory theme); University of Leicester, Infection, Inflammation and Immunity</p> <p>Suzuki, T; Department of Cardiovascular Sciences, University of Leicester, , Cardiovascular Research Centre; Leicester NIHR Biomedical Research</p> |

|           |                                                                                                                                                                                                                                                                                                                                                                                                                                                                                                                                                                                                                                                                                                                                                                                                                                                                                                                                                                                                                                                                                                                                                                                                                                                                                                                                                                                                                                                                          |
|-----------|--------------------------------------------------------------------------------------------------------------------------------------------------------------------------------------------------------------------------------------------------------------------------------------------------------------------------------------------------------------------------------------------------------------------------------------------------------------------------------------------------------------------------------------------------------------------------------------------------------------------------------------------------------------------------------------------------------------------------------------------------------------------------------------------------------------------------------------------------------------------------------------------------------------------------------------------------------------------------------------------------------------------------------------------------------------------------------------------------------------------------------------------------------------------------------------------------------------------------------------------------------------------------------------------------------------------------------------------------------------------------------------------------------------------------------------------------------------------------|
|           | <p>Centre (Cardiovascular theme)<br/> Ng, Leong; Department of Cardiovascular Sciences, University of Leicester, Cardiovascular Research Centre; Leicester NIHR Biomedical Research Centre (Cardiovascular theme)<br/> Gaillard, Erol; Leicester NIHR Biomedical Research Centre (Respiratory theme); Paediatric Clinical Investigation Centre<br/> Beardsmore, Caroline; Leicester NIHR Biomedical Research Centre (Respiratory theme); Paediatric Clinical Investigation Centre<br/> Ryanna, Kimuli; University Hospitals of Leicester NHS Trust<br/> Pandya, Hitesh; Discovery Medicine, Respiratory Therapeutic Area, GlaxoSmithKline PLC<br/> Coates, Tim; University of Leicester, Infection, Inflammation and Immunity; Department of Cardiovascular Sciences, University of Leicester<br/> Monks, Paul; University of Leicester, Infection, Inflammation and Immunity; University of Leicester, Department of Chemistry<br/> Greening, Neil; Leicester NIHR Biomedical Research Centre (Respiratory theme); University of Leicester, Infection, Inflammation and Immunity<br/> Brightling, Christopher; Leicester NIHR Biomedical Research Centre (Respiratory theme); University of Leicester, Infection, Inflammation and Immunity<br/> Thomas, Paul; Loughborough University, Department of Chemistry<br/> Siddiqui, Salman; Leicester NIHR Biomedical Research Centre (Respiratory theme); University of Leicester, Infection, Inflammation and Immunity</p> |
| Keywords: | Breathlessness, Observational study, Volatile Organic Compound, Breath analysis                                                                                                                                                                                                                                                                                                                                                                                                                                                                                                                                                                                                                                                                                                                                                                                                                                                                                                                                                                                                                                                                                                                                                                                                                                                                                                                                                                                          |
|           |                                                                                                                                                                                                                                                                                                                                                                                                                                                                                                                                                                                                                                                                                                                                                                                                                                                                                                                                                                                                                                                                                                                                                                                                                                                                                                                                                                                                                                                                          |

SCHOLARONE™  
Manuscripts

Review only

# 1 Assessment of Breath Volatile Organic Compounds in Acute Cardio- 2 respiratory Breathlessness: A Prospective Real World Observational Study

3  
4  
5  
6  
7  
8  
9  
10  
11  
12  
13  
14  
15  
16  
17  
18  
19  
20  
21  
22  
23  
24  
25  
26  
27  
28  
29  
30  
31  
32  
33  
34  
35  
36  
37  
38  
39  
40  
41  
42  
43  
44  
45  
46  
47  
48  
49  
50  
51  
52  
53  
54  
55  
56  
57  
58  
59  
60

3  
4 Wadah Ibrahim<sup>1,2</sup>, Michael Wilde<sup>3</sup>, Rebecca Cordell<sup>3</sup>, Dahlia Salman<sup>4</sup>, Dorota Ruszkiewicz<sup>4</sup>, Luke  
5 Bryant<sup>3</sup>, Matthew Richardson<sup>1,2</sup>, Robert C. Free<sup>1,2</sup>, Bo Zhao<sup>1,2</sup>, Ahmed Yousuf<sup>1,2</sup>, Christobelle  
6 White<sup>1,2</sup>, Richard J Russell<sup>1,2</sup>, Sheila Jones<sup>5</sup>, Bharti Patel<sup>5</sup>, Asia Awal<sup>5</sup>, Rachael Phillips<sup>6</sup>, Graham  
7 Fowkes<sup>6</sup>, Teresa McNally<sup>7</sup>, Clare Foxon<sup>7</sup>, Hetan Bhatt<sup>1,2</sup>, Rosa Peltrini<sup>1,2</sup>, Amisha Singapuri<sup>1,2</sup>,  
8 Beverley Hargadon<sup>1,2</sup>, Toru Suzuki<sup>8,9</sup>, Leong L. Ng<sup>8,9</sup>, Erol A Gaillard<sup>2,7</sup>, Caroline Beardsmore<sup>2,7</sup>,  
9 Kimuli Ryanna<sup>5</sup>, Hitesh Pandya<sup>11</sup>, Tim Coates<sup>2,10</sup>, Paul Monks<sup>2,3</sup>, Neil Greening<sup>1,2</sup>, Chris E  
10 Brightling<sup>1,2</sup>, Paul Thomas<sup>4</sup>, Salman Siddiqui<sup>1,2</sup>

11  
12  
13 wadah.ibrahim@leicester.ac.uk; mjlw77@leicester.ac.uk; rc145@leicester.ac.uk; d.salman@lboro.ac.uk;  
14 d.m.ruszkiewicz2@lboro.ac.uk; lb368@leicester.ac.uk; mr251@leicester.ac.uk; rcf8@leicester.ac.uk;  
15 bo.zhao@leicester.ac.uk; aly7@leicester.ac.uk; cmjlw3@leicester.ac.uk; rjr22@leicester.ac.uk;  
16 rjr22@leicester.ac.uk; sheila.jones@uhl-tr.nhs.uk; bharti.m.patel@uhl-tr.nhs.uk; asia.awal@uhl-tr.nhs.uk;  
17 rachael.phillips@uhl-tr.nhs.uk; graham.fowkes@uhl-tr.nhs.uk; tm23@leicester.ac.uk; clare.foxon@uhl-  
18 tr.nhs.uk; hetan.bhatt@uhl-tr.nhs.uk; rp417@leicester.ac.uk; amisha.singapuri@uhl-tr.nhs.uk;  
19 beverley.hargadon@uhl-tr.nhs.uk; ts263@le.ac.uk; lln1@le.ac.uk; eag15@leicester.ac.uk; csb@leicester.ac.uk;  
20 kimuli.ryanna@uhl-tr.nhs.uk; hitesh.x.pandya@gsk.com; tim.coates@leicester.ac.uk;  
21 paul.monks@leicester.ac.uk; neil.greening@leicester.ac.uk; ceb17@leicester.ac.uk;  
22 C.L.P.Thomas@lboro.ac.uk; ss338@leicester.ac.uk

23  
24 Corresponding author: Professor Salman Siddiqui, ss338@le.ac.uk

25 NIHR Leicester Biomedical Research Centre (Respiratory Theme)

26 Glenfield Hospital,

27 Groby Road

28 Leicester

29 LE3 9QP

30 t: +44 116 256 3841

31 e: ss338@le.ac.uk

## 32 33 **Authors' affiliations:**

34 <sup>1</sup>Leicester NIHR Biomedical Research Centre (Respiratory theme), Glenfield Hospital, Groby Road, Leicester  
35 LE3 9QP

36 <sup>2</sup> College of Life Sciences, Department of Infection, Immunity and Inflammation, University of Leicester,  
37 University Road, Leicester LE1 7RH

38 <sup>3</sup> Department of Chemistry, University of Leicester, University Road, Leicester, LE1 7RH

- 1  
2  
3 39 <sup>4</sup>Department of Chemistry, Loughborough University, Epinal Way, Loughborough, LE11 3TU  
4  
5 40 <sup>5</sup> University Hospitals of Leicester NHS Trust, Glenfield Hospital, Groby Road, Leicester LE3 9QP  
6  
7 41 <sup>6</sup> NIHR Leicester Clinical Research Facility, Research Space, Level 0, Balmoral Building, Leicester Royal  
8 42 Infirmery, Infirmery Square, Leicester, LE1 5WW  
9  
10 43 <sup>7</sup> Paediatric Clinical Investigation Centre, Leicester Respiratory Biomedical Research Centre, University of  
11 44 Leicester, Leicester Royal Infirmery, Leicester, LE2 7LX  
12  
13 45 <sup>8</sup> Department of Cardiovascular Sciences, University of Leicester, Cardiovascular Research Centre, Glenfield  
14 46 General Hospital, Leicester LE3 9QP.  
15  
16 47 <sup>9</sup> Leicester NIHR Biomedical Research Centre (Cardiovascular theme), Glenfield Hospital, Groby Road,  
17 48 Leicester LE3 9QP  
19  
20 49 <sup>10</sup>Department of Cardiovascular Sciences, University of Leicester, Level G, Jarvis building RMO, Infirmery  
21 50 Square, Leicester LE1 5WW  
22  
23  
24 51 <sup>11</sup> Discovery Medicine, Respiratory Therapeutic Area, GlaxoSmithKline PLC, Gunnels Wood Road, Stevenage,  
25 52 Hertfordshire, SG1 2NY  
26  
27 53  
28  
29 54  
30  
31 55  
32  
33 56  
34  
35 57  
36  
37 58  
38  
39 59  
40  
41 60  
42  
43 61  
44  
45 62  
46  
47 63  
48  
49 64  
50  
51 65  
52  
53 66  
54  
55 67  
56  
57 68  
58  
59  
60

review only

## 69 **Abstract**

### 70 **Introduction**

71 Patients presenting with acute undifferentiated breathlessness are commonly encountered in  
72 admissions units across the United Kingdom. Existing blood biomarkers have clinical utility in  
73 distinguishing patients with single organ pathologies but have poor discriminatory power in multi  
74 factorial presentations. Evaluation of volatile organic compounds (VOC) in exhaled breath offers the  
75 potential to develop biomarkers of disease states that underpin acute cardio-respiratory breathlessness,  
76 owing to their proximity to the cardio-respiratory system. To date there has been no systematic  
77 evaluation of VOC in acute cardio-respiratory breathlessness. The proposed study will seek to use  
78 both offline and online VOC technologies to evaluate the predictive value of VOC in identifying  
79 common conditions that present with acute cardio-respiratory breathlessness.

### 80 **Methods and analysis**

81 A prospective real world observational study carried out across three acute admissions units within  
82 Leicestershire. Participants with self-reported acute breathlessness, with a confirmed primary  
83 diagnosis of either acute heart failure, community acquired pneumonia and acute exacerbation of  
84 asthma or COPD will be recruited within 24 hours of admission. Additionally, school age children  
85 admitted with severe asthma will be evaluated. All participants will undergo breath sampling on  
86 admission and upon recovery following discharge. A range of online technologies including: proton-  
87 transfer-reaction mass spectrometry (PTR-MS), gas chromatography ion mobility spectrometry (GC-  
88 IMS), atmospheric pressure chemical ionisation- mass spectrometry (APCI-MS) and offline  
89 technologies including gas chromatography mass spectroscopy (GC-MS) and comprehensive two-  
90 dimensional gas chromatography-mass spectrometry (GCxGC-MS) will be utilised for VOC  
91 discovery and replication. For offline technologies a standardised CE marked breath sampling device  
92 (ReCIVA<sup>®</sup>) will be used. All recruited participants will be characterised using existing blood  
93 biomarkers including C - reactive protein (CRP), brain derived natriuretic peptide (BNP), Troponin-I  
94 and blood eosinophil levels and further evaluated using a range of standardised questionnaires, lung  
95 function testing, sputum cell counts and other diagnostic tests pertinent to acute disease.

1  
2  
3 96 **Ethics and dissemination**

4  
5 97 The National Research Ethics Service Committee East Midlands has approved the study protocol  
6  
7 98 (REC number: 16/LO/1747). IRAS 198921. Findings will be presented at academic conferences and  
8  
9 99 published in peer-reviewed scientific journals. Dissemination will be facilitated via a partnership with  
10  
11 100 the East Midlands Academic Health Sciences Network and via interaction with all UK funded  
12  
13 101 MRC/EPSRC molecular pathology nodes.  
14  
15  
16 102

17  
18 103 **Key words:** Breathlessness; Breath analysis; Volatile Organic Compound, Observational study  
19  
20 104  
21  
22  
23 105  
24  
25  
26 106  
27  
28  
29 107  
30  
31  
32 108  
33  
34  
35 109  
36  
37  
38 110  
39  
40  
41 111  
42  
43  
44 112  
45  
46  
47 113  
48  
49  
50 114  
51  
52 115  
53  
54 116  
55  
56 117  
57  
58  
59  
60

## 118 **Strengths and Limitations of this Study**

### 119 **Strengths**

- 120 • A pragmatic real world, prospective, observational study across three admission units that  
121 focuses on the systematic discovery and replication of VOC in acutely breathless patients  
122 using both online and offline technologies
- 123 • The study will evaluate populations that often present with diagnostic uncertainty  
124 including elderly multi-morbid patients and school age children
- 125 • The proposed study is the largest of its kind in acute disease to characterise VOC with a  
126 range of additional assessments that will build a comprehensive phenotype of acute  
127 cardio-respiratory exacerbations
- 128 • Benchmarking of candidate VOC to established blood based biomarkers utilised in  
129 clinical practice e.g. BNP, CRP will form an important method of validation against  
130 existing molecular pathology
- 131 • The proposed study will build an infrastructure for research and subsequent evaluation of  
132 VOC in interventional trials within acute cardio-respiratory exacerbations

### 133 **Limitations**

- 134 • Prior acute treatment exposure will need to be accounted for when evaluating potential  
135 discriminative biomarkers
- 136 • VOC technologies are not currently suited for deployment in patients that are of high clinical  
137 acuity e.g. severe respiratory failure and thus the study will self-select patients that can be  
138 safely sampled with online and offline methodologies
- 139 • Although the study will quantify and evaluate diagnostic uncertainty, the study does not  
140 enrich for these cases and the patient population will predominantly comprise of patients in  
141 whom a senior clinical decision maker could make the primary clinical diagnosis within 24  
142 hours of admission. As a consequence future studies will be required to evaluate the  
143 biomarkers developed in cardio-respiratory exacerbations where the diagnosis is unclear.



## 1. Introduction:

Breathlessness is a common symptom of cardio-respiratory illnesses that has a significant direct impact on patients' wellbeing as well as a substantial economic burden on healthcare systems [1]. Although its etiologies can be variable, exacerbations of common complex chronic cardio-respiratory conditions account for approximately 70% of acute presentations with breathlessness, namely exacerbations of asthma and COPD, acute heart failure and community acquired pneumonia [2]. Moreover, moderate and severe breathlessness is significantly associated with all-cause, cardiovascular and COPD mortality[3]. As a consequence symptomatic breathlessness warrants rapid evaluation and targeted diagnostics at presentation.

Diagnostic evaluation of acute breathlessness is heavily reliant on blood based biomarkers e.g. CRP, BNP, Troponin and on occasions blood eosinophil levels. These biomarkers have clinical utility primarily in patients with single pathologies, but have poor discriminatory power in patients with multifactorial presentations of acute breathlessness[4]. There is therefore an unmet need for the development of sensitive and specific biomarkers that differentiate acute breathlessness from its recovery and the common cardio-respiratory conditions that present with acute breathlessness.

CRP plays an important role in diagnosing breathlessness caused by an underlying bacterial pneumonia[5], as well as predicting mortality in patients with COPD [6]. BNP is routinely utilised in acute settings to support the diagnosis of acute heart failure [7].The European Society of Cardiology (ESC) recommends BNP threshold values of <100 pg/mL to rule out acute congestive cardiac failure and values > 500 pg/ml as diagnostic of acute exacerbations of heart failure [8].

The role of peripheral blood eosinophil count in airway inflammation was poorly understood up until the second half of the 19<sup>th</sup> century when Paul Ehrlich, a German physician and Nobel prize winner, introduced eosin in his technique for white cell differentiation in 1879[9] . Considerable advances in the field of airway inflammation and the role of eosinophils have taken place since [10-12]. More

1  
2  
3 171 recently Bafadhel *et al* suggested that peripheral blood eosinophil count can be used to direct  
4  
5 172 corticosteroid therapy during COPD exacerbations in single centre study [13].  
6  
7 173 Currently, blood biomarkers together with clinical, physiological and imaging parameters are used in  
8  
9 174 diagnosing the cause of acute breathlessness. Blood biomarkers may be less specific as they originate  
10  
11 175 far from the target organs of interest (the heart and the lungs in cardio-respiratory disease). Sputum,  
12  
13 176 although potentially a more definitive lung specific matrix, is comparatively difficult to obtain  
14  
15 177 particularly in acutely unwell patients, limiting its use in acute disease and highlighting the need for  
16  
17 178 better biomarkers. Ideally these biomarkers would have the following characteristics, (i) they would  
18  
19 179 originate from the target organ of interest, (ii) they would significantly add value to conventional risk  
20  
21 180 scoring and diagnostic algorithms in acute breathlessness, (iii) they would be minimally invasive and  
22  
23 181 suitable for rapid point of care diagnosis in emergency rooms and acute admissions units (iv) they  
24  
25 182 would have diagnostic value in patients with multifactorial acute breathlessness.

26  
27 183  
28  
29 184 Exhaled breath contains thousands of volatile organic compounds (VOC) that reflect biological  
30  
31 185 processes occurring in the host both locally in the airways and systematically offering the potential to  
32  
33 186 develop more effective biomarkers in acutely breathless patients (**Figure 1**).

34  
35 187  
36  
37 188 The proposed program of research will use a combination of offline and online technologies to  
38  
39 189 identify and evaluate the diagnostic and prognostic value of VOC in patients with acute cardio-  
40  
41 190 respiratory related breathlessness (**Figure 2**).

42  
43 191  
44  
45 192 Exhaled breath analysis of volatile chemicals offers the potential to develop more effective biomarkers  
46  
47 193 in acutely breathless patients. The use of breath analysis for disease diagnostics dates back to ancient  
48  
49 194 Greeks where physicians used exhaled breath to diagnose different diseases. Breath odours allow  
50  
51 195 correct associations to certain diseases. For example, the sweet smell of diabetic ketoacidosis, the  
52  
53 196 fishy smell of breath associated to liver illness, the urine-like odour of kidney disease and the smell of  
54  
55 197 the breath of patients with lung abscesses, caused by the proliferation of anaerobic bacteria [14-17].

1  
2  
3 198 More recently, exhaled breath analysis has demonstrated early proof of concept in the diagnosis of  
4  
5 199 acute heart failure, ventilator associated pneumonia[18] and stable state airways disease [15]. The  
6  
7 200 validity of breath analysis has also been demonstrated in breathless children[19]. This population is  
8  
9 201 likely to prefer breath-based tests, as these are minimally invasive. Importantly, a variety of point of  
10  
11 202 care sensors are now available to evaluate potential exhaled breath biomarkers in emergency care  
12  
13 203 settings.

14  
15 204

16  
17 205 Despite the novelty of non-invasive sampling technology and the growing interest in exhaled breath  
18  
19 206 analysis there remains a disappointing level of comparability across studies due to the lack of  
20  
21 207 standardisation and appropriate data analysis methods.

22  
23 208 A recent systemic review by Anders Christiansen *et al* compared eleven publications reporting very  
24  
25 209 heterogeneous designs, methods, patient group sizes, data analytics and, consequently, quite varying  
26  
27 210 results [20].

28  
29 211

30  
31 212 To our knowledge, no other large studies exploring the use of breath biomarkers in profiling acute  
32  
33 213 breathlessness have been completed. Few studies have explored the use of electronic nose in stable  
34  
35 214 disease with good discriminatory power in COPD [21], Pneumonia [22] and heart failure[23] with  
36  
37 215 relatively small sample size. The focus of the current research study will be to evaluate acutely  
38  
39 216 breathless cardio-respiratory patients using a combination of ‘discovery’ and near-patient care breath  
40  
41 217 sampling technologies.

42  
43 218 Medical Research Council (MRC) and Engineering and Physical Sciences Research Council (EPSRC)  
44  
45 219 have commissioned a series of molecular pathology nodes aimed at developing molecular signatures  
46  
47 220 relevant to disease diagnosis and progression. This was triggered by the clear need for alliance  
48  
49 221 between academic institutions, industry and NHS partners to enhance the benefits of stratified  
50  
51 222 medicine for patients[24, 25].

52  
53 223 University of Leicester and Loughborough University were awarded a joint molecular pathology node  
54  
55 224 East Midlands Breathomics Pathology Node (EMBER) which this study forms a key part of.

56  
57 225

## 226 **2. Methods and Analysis**

### 227 **2.1. Study design**

228 A prospective real world observational study across three acute admissions units within Leicestershire  
229 (two adult admissions units and one children's assessment unit). The acute units routinely assess and  
230 treat cardio-respiratory admissions due to breathlessness in adults and children.

231 Participants with self-reported acute breathlessness, either requiring admission or a change in baseline  
232 treatment, will be screened for the study. Informed consent will be obtained in all participants  
233 following a clinical review by a senior decision maker within 24 hours of acute admission (**Figure 3**).

234

235

### 236 **2.2. Objectives**

#### 237 **2.2.1. Primary objective**

- 238
- 239 • To evaluate the sensitivity, specificity, positive and negative predictive value of exhaled  
240 breath VOC biomarkers to differentiate acute breathlessness in cardio-respiratory patients.

#### 241 **2.2.2. Secondary objectives:**

- 242
- 243 • To replicate selected breath VOC biomarkers identified in acute breathlessness.
  - 244 • To discover and replicate breath VOC biomarkers that differentiate the common cardio-  
245 respiratory conditions that cause acute breathlessness, specifically (i) acute heart failure, (ii)  
246 community acquired pneumonia, (iii) adult exacerbations of asthma and COPD and age-  
247 matched adults that do not have cardio-respiratory disease or breathlessness.
  - 248 • To quantify the level of clinical uncertainty in the primary diagnosis using a 100 mm visual  
249 analogue scale and independent clinical adjudication of case notes blinded to the following  
250 blood biomarkers (i) CRP (ii) BNP (iii) Troponin-I (iv) blood eosinophils, but not clinical  
251 history and acute presentation nor chest x-ray imaging. Potential discriminatory breath VOC  
252 biomarkers will be adjusted for clinical uncertainty in statistical models.
  - 253 • To identify and replicate exhaled breath VOC biomarkers in school age children treated in  
254 hospital for severe asthma attacks and compare these to age-matched healthy controls.

1  
2  
3 255 **2.2.3. Exploratory end points (where applicable):**  
4 256

- 5 257 • To evaluate the dynamic profile of selected breath VOC between the acute state and the  
6  
7 258 recovery state post exacerbation.  
8  
9 259 • To evaluate the relationship between exhaled VOC biomarkers and clinical outcomes  
10  
11 260 including (i) hospital readmission at 30 and 60 days post event (ii) all-cause mortality over a 2  
12  
13 261 year period post admission.  
14  
15 262 • To evaluate the relationship between breath VOC biomarkers and functional measures  
16  
17 263 e.g. physical performance and activity  
18  
19 264 • To explore potential breath VOC biomarkers of multifactorial acute breathlessness  
20  
21 265 • To evaluate the relationship between diet, lifestyle and environment upon breath VOC  
22  
23 266 biomarkers  
24

25 267  
26 267  
27 268 **2.3. Sample size estimation**  
28

29 269  
30  
31 270 Preliminary data was utilised to conduct sample size estimates from a cohort of acutely breathless  
32  
33 271 patients admitted to acute admissions units over a 6 month period (February 2017 to August 2017).  
34  
35 272 Hundred and twelve adult participants (asthma 46, community acquired pneumonia 26, COPD 22)  
36  
37 273 and eighteen healthy controls were utilised for the analysis.  
38

39 274 A panel of ten pre-specified aldehydes, based on literature search [26-28], were extracted from breath  
40  
41 275 using gas chromatography-mass spectrometry (GC-MS). The aldehydes were normalised to a  
42  
43 276 common internal standard and were not background-subtracted.  
44

45  
46 277 A closed formula from Hsieh *et al*[29], relating sample size to observable effect size, was used to  
47  
48 278 calculate sample size from logistic regression models of the ten aldehydes with acute breathlessness  
49  
50 279 as the outcome measure. The sample size estimates are also relevant to acute class comparisons vs.  
51  
52 280 the sum of other acute classes.  
53

54 281 Based upon the sample size estimates we would have an 80% power, with a type 1 error rate of 5%, to  
55  
56 282 detect an odds ratio of association of 1.2 between two disease classes with 55 patients per class. Given  
57

1  
2  
3 283 the fact that study seeks to discover and replicate breath VOC amongst five adult disease classes  
4  
5 284 (community acquired pneumonia, heart failure, COPD, asthma and healthy aged matched subjects) we  
6  
7 285 would require 110 adult patients per class – 550 patients across the program to achieve these aims.  
8

9  
10 286 The closed formulae by Tihaki *et al*,[30] were also utilised to understand the discriminatory power  
11  
12 287 that the samples sizes above would provide with respect to biomarker sensitivity and specificity; The  
13  
14 288 following assumptions were made:

- 15  
16 289 • That a sensitivity of 80 % with a precision of 5% would provide a useful biomarker capable  
17  
18 290 of ‘ruling out’ an acute class. The same target was applied to specificity.  
19  
20 291 • We assume a prevalence of acute breathlessness of 80% as the recruitment campaign uses  
21  
22 292 acute breathlessness as the initial stratification tool for recruitment and 1:5 patients recruited  
23  
24 293 will be non-breathless healthy controls  
25  
26 294 • We aim to balance group sizes across classes equally  
27

28 295 For a type 1 error rate of 0.05 and a 95% confidence interval

29  
30 296  $N_{\text{sensitivity}} = 307$

31  
32 297  $N_{\text{specificity}} = 1,230$

33  
34 298

35 299 For a type 1 error rate of 0.05 and a 90% confidence interval

36  
37 300  $N_{\text{sensitivity}} = 218$

38  
39 301  $N_{\text{specificity}} = 871$

40  
41 302

42 303 For a type 1 error rate of 0.05 and an 85% confidence interval

43  
44 304  $N_{\text{sensitivity}} = 166$

45  
46 305  $N_{\text{specificity}} = 664$

47  
48 306

49 307 For a type 1 error rate of 0.05 and an 80% confidence interval

50  
51 308  $N_{\text{sensitivity}} = 131$

52  
53 309  $N_{\text{specificity}} = 524$

54  
55 310  
56  
57  
58  
59  
60

1  
2  
3 311 Therefore, we are powered to identify sensitive biomarkers ( $\geq 80\%$ ) of acute breathlessness with a  
4  
5 312 maximum marginal error in the estimate for sensitivity not exceeding 5% with 95% confidence.  
6  
7 313 Similarly, we are powered to identify specific biomarkers ( $\geq 80\%$ ) of acute breathlessness with a  
8  
9 314 maximum marginal error in the estimate for specificity not exceeding 5% with 80% confidence.  
10  
11 315 For the primary analysis the outcome will be treated as a nominal variable with levels (i) acute heart  
12  
13 316 failure (ii) community acquired pneumonia (iii) adult exacerbations of asthma and COPD and (iv)  
14  
15 317 acute exacerbations in school age children treated in hospital for severe asthma attacks.  
16  
17 318 The relationship between the primary outcome and the exhaled breath VOC biomarkers will be  
18  
19 319 modelled using multinomial logistic regression. In addition to metabolomics markers the following  
20  
21 320 independent variables will be included in the model: clinical uncertainty score on a 100 mm VAS  
22  
23 321 scale, age, and a validated co morbidity score (the Charlson comorbidity score)[31, 32].  
24  
25 322  
26  
27 323 Receiver operator analyses will be utilised to generate ROC curves for individual and multiple panels  
28  
29 324 VOC predictors in the primary analysis.  
30  
31 325  
32  
33  
34 326 To understand the dynamic profile of breath biomarkers during (i) the acute state and (ii) in the  
35  
36 327 chronic state up to 6 months post exacerbation, a repeated measures model with a random intercept  
37  
38 328 and random effect for time will be fitted, the random effects will be fitted for each patient. For the  
39  
40 329 repeated measures mixed model an unstructured covariance will be assumed. To evaluate the  
41  
42 330 relationship between breath biomarkers and hospital readmission at 30 and 60 days Cox proportional  
43  
44 331 hazards and frailty models will be utilised [33]. Analysis of Multivariate Survival Data, [CITE]  
45  
46 332 competing risk models and joint models will be fitted [34]. Relationship between death and breath  
47  
48 333 biomarkers will be evaluated using a logistic regression model. Changes in outcome measures will be  
49  
50 334 measured appropriately for each variable (e.g. paired t-test, Mann-Whitney, repeated measures  
51  
52 335 analysis). Tables of descriptive statistics will be compiled for all key variables  
53  
54  
55 336 All analysis will be performed using R 3.5.0 <https://www.r-project.org/>.  
56  
57 337

## 338 **2.4. Discovery and Replication studies**

339 Specific indicator conditions have been selected for targeted recruitment according to their high  
340 prevalence and unmet need, their high morbidity and mortality and the need to develop better  
341 diagnostic and prognostic algorithms in acute care pathways.

342 The indicator diagnoses of interest are (i) exacerbations of adult asthma and COPD, (ii) community  
343 acquired pneumonia (iii) acute heart Failure and (iv) exacerbation in school age children treated in  
344 hospital for severe asthma attacks.

345 Patient level clinico-pathological and outcome data (spanning the entire acute pathway) will be  
346 collected in parallel to breath sampling. In addition, breath samples will be acquired in the stable state  
347 post exacerbation (**Figure 3**).

348  
349 Age matched healthy volunteers will be recruited where possible at separate visits. For acute admission  
350 the study team will approach the spouse, parent or sibling of the index case and seek informed consent  
351 for study assessments. All healthy subjects will undergo two assessments separated by a duration of 8-  
352 16 weeks to match the acute and recovery time points elapsed in their index  
353 case/partner/spouse/sibling/child. Additional healthy volunteers will be identified from local  
354 recruitment databases and via advertising

### 356 **2.4.1. Discovery Phase (Project months 1-24):**

357 The aim of the discovery phase is to identify putative discriminatory breath VOC, using both offline  
358 and online technologies.

359 Pre-planned recruitment of acutely breathless patients will be enriched into the following disease  
360 strata following senior clinical decision maker assessment and within 24 hours of acute admission.

361 Acute adult heart failure (n=55), adult community acquired pneumonia (n=55), adult exacerbations of  
362 asthma (n=55) and COPD (n=55), acute severe asthma attacks in school age children (n=55).

363 Additional age matched healthy volunteers (n=55 adults and 50 children) will be identified as a non-  
364 disease reference group.



1  
2  
3 365 **2.4.2. Replication Phase (years 3-4)**

4  
5 366 The aim of the replication phase is to replicate putative discriminatory breath VOC /VOC signatures  
6  
7 367 identified in the discovery phase.

8  
9 368 The aim of the discovery phase is to identify putative discriminatory breath VOC, using both offline  
10  
11 369 and online technologies.

12  
13 370 Pre-planned recruitment of acutely breathless patients will be enriched into the following disease  
14  
15 371 strata following senior clinical decision maker assessment and within 24 hours of acute admission.

16  
17 372 Acute adult heart failure (n=55), adult community acquired pneumonia (n=55), adult exacerbations of  
18  
19 373 asthma (n=55) and COPD (n=55), acute severe asthma attacks in school age children (n=55).

20  
21 374 Additional age matched healthy volunteers (n=55 adults and 50 children) will be identified as a non-  
22  
23 375 disease reference group.

24  
25 376 **Total combined sample size of the discovery and replication phases = 650 participants**

26  
27 377

28 378 **2.5. Schedule of assessments**

29  
30  
31 379 A schedule of acute assessments is outlined below and aligns to the movement of acute patients  
32  
33 380 through the clinical care pathway and the overall aim of developing a complete phenotypic picture of  
34  
35 381 acutely breathless patients.

36  
37 382

38  
39 383 **2.5.1. Defining acute breathlessness**

40  
41 384 At presentation (within 24 hours of admission) to one of three acute admissions units potentially  
42  
43 385 eligible patients will be identified following confirmation of acute breathlessness, identified as (i)  
44  
45 386 patient defined acute breathlessness and/or (ii) 1 unit increase above patient reported baseline in the  
46  
47 387 extended medical research council (eMRC) dyspnoea score [35, 36] and at least one of the indicator  
48  
49 388 diagnoses identified as the primary clinical diagnosis by a senior clinical decision maker.

50  
51 389

52  
53 390

54  
55 391

### 392 **2.5.2 Informed consent**

393 Patients meeting the pre-specified definition of acute breathlessness will be approached for informed  
394 consent in to the breath VOC biomarker study. Only patients that are eligible to give full written  
395 informed consent will be recruited.

### 397 **2.5.3 Collection of blood based pathology markers**

398 Collection of the blood biomarkers CRP, BNP, Troponin-I and blood eosinophil count will be  
399 performed both acutely and following recovery, when not taken as part of clinical care pathway.  
400 These are currently used in profiling acutely breathless patients in clinical practice (**Table1**).

| Test                             | ANALYSER/METHOD                                                                                                        | LOWER LIMIT OF DETECTION | UPPER LIMIT OF DETECTION |
|----------------------------------|------------------------------------------------------------------------------------------------------------------------|--------------------------|--------------------------|
| C-Reactive protein (CRP)         | Siemens Advia Chemistry XPT, PEG enhanced immunoturbidimetric.<br>Siemens Advia 1800, PEG enhanced immunoturbidimetric | 5 mg/L                   | Diluted to result        |
| B-type natriuretic peptide (BNP) | Siemens Advia Centaur XPT, two-site sandwich immunoassay using direct chemiluminescent technology                      | 2.0 pg/mL                | 1445 pg/mL               |
| Troponin-I                       | Abbott Architect i2000SR, three-site sandwich immunoassay using direct chemiluminescent technology (CMIA).             | 5.0 ng/L                 | 50,000 ng/L              |

401

402 **Table (1):** Type of analyser and methodology used for blood biomarker calculation. The table  
403 outlines analyser make, methodology, upper and lower limits of detection as per the University  
404 Hospitals of Leicester NHS Foundation trust laboratory guidelines.

405

### 406 **2.5.4 Breath VOC sampling**

407 Offline breath sampling using GC-MS coupled with a standardised and CE marked breath sampler-  
408 ReCIVA<sup>®</sup>[37] and comprehensive two-dimensional gas chromatography-mass spectrometry, coupled  
409 with a standardised and CE marked breath sampler (ReCIVA<sup>®</sup> GCxGC-MS) will be performed .  
410 Additionally the following online technologies, proton transfer mass spectrometry (PTR-MS), gas  
411 chromatography - ion mobility spectrometry (GC-IMS) and atmospheric pressure chemical ionisation-

412 mass spectrometry (APCI-MS) will be evaluated according to the sampling strategy outlined in

|                                                                       | COPD |   | Asthma |   | Pneumonia |   | Heart Failure |   | Healthy |   | Paediatrics |   |
|-----------------------------------------------------------------------|------|---|--------|---|-----------|---|---------------|---|---------|---|-------------|---|
| Time point                                                            | 1    | 2 | 1      | 2 | 1         | 2 | 1             | 2 | 1       | 2 | 1           | 2 |
| Written informed consent                                              | x    |   | x      |   | x         |   | x             |   | x       |   | x           |   |
| <b>Volatile organic compound (VOC) sampling</b>                       |      |   |        |   |           |   |               |   |         |   |             |   |
| ReCIVA- gas chromatography and mass spectrometry (GC-MS)              | x    | x | x      | x | x         | x | x             | x | x       | x | x           | x |
| ReCIVA- comprehensive two-dimensional gas chromatography (GCxGC-MS)   | x    | x | x      | x | x         | x | x             | x | x       | x | x           | x |
| Atmospheric pressure chemical ionisation- mass spectrometry (APCI-MS) | x    | x | x      | x | x         | x | x             | x | x       | x | x           | x |
| Proton transfer reaction mass spectrometry (PTRMS)                    |      | x |        | x |           | x |               | x | x       | x | x           | x |
| Gas chromatography - ion mobility spectrometry (GC-IMS)               | x    |   | x      |   | x         |   | x             |   |         |   | x           | x |
| <b>Pathology blood tests</b>                                          |      |   |        |   |           |   |               |   |         |   |             |   |
| Full blood count (including differential cell count)                  | x    | x | x      | x | x         | x | x             | x | x       | x | x           | x |
| Brain natriuretic peptide (BNP) [pg/mL]                               | x    | x | x      |   | x         |   | x             | x | x       |   |             |   |
| Troponin-I [ng/L]                                                     | x    |   | x      |   | x         |   | x             |   | x       |   |             |   |
| C-Reactive protein (CRP) [mg/L]                                       | x    | x | x      | x | x         | x | x             | x | x       | x | x           | x |
| <b>Lung function tests</b>                                            |      |   |        |   |           |   |               |   |         |   | x           | x |
| Hand held forced oscillation technique (FOT)                          | x    | x | x      | x | x         | x | x             | x | x       | x |             |   |
| Fractional exhaled nitric oxide (FeNO) - Flow rate 50 [ml/s]          |      |   | x      | x |           |   |               |   |         |   | x           | x |
| Spontaneous sputum sample                                             | x    | x | x      | x | x         | x | x             | x | x       | x |             |   |
| Bio-banking (urine, serum, plasma, sputum supernatants & plugs)       | x    | x | x      | x | x         | x | x             | x | x       | x | x           | x |
| Transthoracic echocardiography                                        | x    |   |        |   |           |   | x             |   |         |   |             |   |

413 section 3, **Figure 3 and Table 2.**

414 **Table (2):** Summary of baseline and follow up assessments. The table summarises key assessments  
 415 carried out at different time points during the study. The participants may undertake any combination  
 416 of the investigations listed at any of these time points.

417

1  
2  
3 418

4 419

5 420

6  
7  
8 421 **2.5.5. Collection of additional samples for future biomarker campaigns**9  
10 422 Collection of additional biomarkers for future biomarker discovery campaigns including (i) a urine11  
12 423 sample, (ii) blood samples, up to 85mls for DNA, RNA, plasma and serum and peripheral blood cell13  
14 424 flow cytometry in selected subjects and (iii) spontaneous or induced sputum samples (plugs and15  
16 425 supernatants) will be carried out (**Table 2**).17  
18 42619  
20 427 All samples will be collected at time point 1 and at 2 (**Figure 3**). The additional samples will be used21  
22 428 for future omics analyses, these may include detailed analysis of the metagenome in sputum and23  
24 429 proteomics applied to urine and serum samples.25  
26 43027  
28 431 **2.5.6. Physiological characterisation**29  
30  
31 432 Physiological measures of lung function will be performed in acutely ill participants and at32  
33 433 recovery including, (i) Hand held forced oscillation technique (FOT): an easily accessible34  
35 434 measure of lung function. Patients favour this to spirometry as it is effort independent, unlike36  
37 435 spirometry and requires less than a minute of quiet tidal breathing to obtain triplicate high38  
39 436 quality measurements [38], (ii) Fractional exhaled nitric oxide (FeNO): A measure of airway40  
41 437 inflammation in asthmatic patients[39, 40] (iii) Echocardiography: Two dimensional42  
43 438 transthoracic echocardiography was performed in heart failure and COPD patients using an44  
45 439 iE 33 system with S5-1 transducer (frequency transmitted 1.7 MHz, received 3.4 MHz;46  
47 440 Philips Medical Systems, Best, The Netherlands). Standard techniques as per American48  
49 441 Society of Echocardiography guidelines (ASE)[41] were used to acquire 2D, colour and50  
51 442 Doppler images in conventional parasternal long-axis, short-axis and apical 4-, 2- and 3-52  
53  
54  
55  
56  
57  
58  
59  
60

1  
2  
3 443 chamber views. Left ventricular ejection fraction (LVEF) was calculated using the biplane  
4  
5 444 method of discs formula (Simpson's rule) to derive left ventricular volume indices.  
6  
7

8 445

#### 10 446 **2.5.7 Recovery follow up**

12 447 The recovery from an acute exacerbation will be confirmed and identified as patient defined recovery,  
13  
14 448 at the recovery study visit (time point 2) up to six months post-acute event. The schedule of  
15  
16 449 assessments at the recovery visit is outlined (**Table 2**).  
17

18 450

#### 19 451 **2.6. Clinical Adjudication:**

20 452

21 453 In an effort to reduce data variability and minimise bias, an independent panel consisting of two senior  
22  
23 454 acute clinicians (SS & NG) will review all pertinent clinical and diagnostic source documentation,  
24  
25 455 whilst blinded to admission blood biomarkers and clinical diagnosis.  
26

27 456 All acutely breathless adult patients' notes will be sequentially divided for adjudication. The panel will  
28  
29 457 independently determine the primary diagnosis of highest probability from a list of the four potential  
30  
31 458 acute indicator diagnoses in section 2.4 and mark their level of clinical certainty on a 100 mm visual  
32  
33 459 analogue scale (VAS scale). The panel members will be able to review imaging, electrocardiograms  
34  
35 460 (ECGs), and other relevant information but not admission blood based pathology tests.  
36

37 461 In a subset of patients adjudication will be validated by separate panel member to ensure between  
38  
39 462 observer agreement using Bland-Altman analysis and inter-rater agreement of the primary diagnosis  
40  
41 463 using Kohen's kappa via repeated evaluation of a subset of cases (see statistical methods section 2.3).  
42

43 464

#### 45 465 **2.7. Clinical Informatics:**

46 466

47  
48 467 Clinical data collection will be undertaken using a securely-hosted bespoke database system (ADD)  
49  
50 468 developed within the NIHR Leicester Biomedical Research Centre – Respiratory (BRC). The system  
51  
52 469 links acute admission episodes to hospital pathology records; historical respiratory physiology tests;  
53  
54 470 and demographic information. The system provides functionality to validate data entry; manually  
55  
56 471 verify records and highlight incomplete records. A custom VOC 'module' has been created to  
57

1  
2  
3 472 support data collection within the study visits (1 and 2), and standardise diagnoses and medications  
4 473 through the use of clinical ontologies as well as linking hospital records/tests to patient visits.  
5  
6

7 474

8 475 Non-ADD based clinical data (e.g. hospital admissions, re-admissions and mortality) will be extracted  
9 476 from the hospital data warehouse using identifiable patient identifiers, and subsequently  
10 477 pseudonymised prior to integration.  
11  
12

13 478

14 479 An informatics pipeline will be created to facilitate the transfer of chemo-metric data from remote  
15 480 computers to the data repository. This will include tools to (i) enforce the correct labelling of data sets  
16 481 (e.g. study number, visit, type/source of sample) prior to automated validated transfer to the  
17 482 repository; (ii) record information about the sample process; (iii) search and extract data sets from the  
18 483 repository for subsequent analysis. Prior to analysis, clinical and chemo-metric data will be integrated  
19 484 using the study number and any potentially identifiable information will be removed.  
20  
21  
22  
23  
24  
25  
26  
27  
28

29 485

### 30 486 **3. Breath profiling**

31 487

32 488 The technologies utilised in the VOC study during discovery and replication phases are:

33  
34  
35  
36 489 Offline technologies

- 37  
38 490 - ReCIVA+ GC-MS  
39 491 - ReCIVA + GC x GC-MS  
40 492 -

41  
42  
43 493 Online technologies

- 44  
45 494 - GC-IMS  
46 495 - PTR-MS  
47 496 - APCI-MS  
48  
49

50 497

51  
52 498 Offline technologies will underpin the discovery analyses owing to their ability to identify chemical  
53 499 identity and their recognition as the analytical gold standard in exhaled breath VOC analysis [42].  
54  
55  
56  
57  
58  
59

1  
2  
3 500 In contrast online technologies will be utilised for VOC biomarker replication and at the recovery  
4  
5 501 visits owing to their portability and potential for future point of care testing. **(Figure 4)**.

6  
7 502 A brief description of the core VOC platforms is provided below

8  
9 503 A CE marked breath sampling device (ReCIVA®) developed by Owlstone Medical, will be used to  
10  
11 504 sample breath onto adsorbent Tenax tubes. This effectively allows de-coupling of the breath sampling  
12  
13 505 from the breath sensor and analysis platforms in selected patients that are not able to mobilise to a real  
14  
15 506 time breath sampling device. The Owlstone ReCIVA sampler will be utilised in breath collection for  
16  
17 507 offline technologies namely GC-MS and GCxGC-MS. The ReCIVA sampler is capable of entraining  
18  
19 508 oxygen and is therefore suitable for patients with mild respiratory failure requiring low flow rates of  
20  
21 509 oxygen to maintain target oxygen saturations [37].  
22

23  
24 510 **3.1. Gas chromatography and mass spectroscopy (GC-MS):** is a commonly applied methodology  
25  
26 511 used to accurately measure trace gases in complex mixtures such as exhaled air [42]. Pre-  
27  
28 512 concentrating breath volatiles by various means and subsequent analysis constitute a reliable and  
29  
30 513 sensitive method for VOC analysis [43]. Despite its high sensitivity, it is however, a time consuming  
31  
32 514 technique and carries a risk of contamination at the pre-concentration step. It is also not suitable for  
33  
34 515 online and multiple measurements limiting its use as a point-of-care testing technology for VOC [44].  
35

36 516 **3.2. Comprehensive two-dimensional gas chromatography-mass spectrometry (GCxGC-MS):** an  
37  
38 517 advanced analytical technique for the analysis of complex organic matrices; its main advantage is the  
39  
40 518 unparalleled separation power it affords over conventional one-dimensional chromatographic  
41  
42 519 techniques [45]. Previous research, albeit sparse, has demonstrated the potential of GCxGC-MS for  
43  
44 520 breath analysis with the number of VOC detected exceeding those detected by conventional GC-MS  
45  
46 521 [46, 47]. GCxGC-MS of breath metabolites has been used for the identification of biomarkers related  
47  
48 522 to glucose metabolism [48, 49], tuberculosis [50] and radiation response [51]. This has generated  
49  
50 523 interest within the breath research community, however, such studies were conducted on a small scale  
51  
52 524 (<50 patients) and involved the use of expensive detectors and modulators. Method development and  
53  
54 525 analysis of the data-rich GCxGC chromatograms, however, can be time-consuming and require  
55  
56 526 specialist knowledge.

1  
2  
3 527 **3.3. Proton-transfer-reaction mass spectrometry (PTRMS):** a real time technique, capable of  
4  
5 528 simultaneously measuring the evolution of multiple gas metabolites from a single breath. It has been  
6  
7 529 used for the identification of potential useful VOC biomarkers for diagnosis of a variety of diseases:  
8  
9 530 including various cancers[52-54], liver disease[55, 56] and respiratory disease[57]. It has several  
10  
11 531 advantages in clinical settings, such as the speed of sampling, the instant result achieved and the lack  
12  
13 532 of need for sample storage or shipping. However, owing to the lack of pre-concentration or  
14  
15 533 chromatographic separation, sensitivity and definitive compound identification can be somewhat  
16  
17 534 limited when compared to GC-MS.

18  
19 535 **3.4. Gas chromatography- ion mobility spectrometry (GC-IMS):** allows the detection of volatile  
20  
21 536 organic compounds down to ultra-trace level (ng/L - to pg/L - range). For years, IMS has been used to  
22  
23 537 discover potential discriminatory breath VOC in lung cancer [58, 59], COPD[60, 61] and asthma[61].  
24  
25 538 The technology's multiple advantages of ultra-sensitivity, portability, online sampling and short  
26  
27 539 analysis time (typical analysis time of 10 minutes) with real time detection, brings a promise to  
28  
29 540 provide immediate and potentially reliable results for point of care breath diagnostics. Another  
30  
31 541 concept with IMS devices is that once the required breath signatures have been discovered using GC-  
32  
33 542 MS, IMS offers the potential to be 'tuned' for selective detection of VOC.

34  
35  
36 543 **3.5. Atmospheric pressure chemical ionisation- mass spectrometry (APCI-MS) semiportable**  
37  
38 544 **compact version:** is one of less sensitive but more affordable versions of mass spectrometers released  
39  
40 545 to the commercial market in recent years. The device uses APCI to produce ions. Although the most  
41  
42 546 common use of APCI-MS systems is the detection in liquid chromatography applications, the  
43  
44 547 technique has proven to be a valuable tool for direct measurement of VOC in air[62, 63] food[64, 65]  
45  
46 548 and breath[66, 67]. Recently, the technique has shown potential for online, real time profiling of  
47  
48 549 pseudo-metabolites in exhaled breath [68] with sensitivity comparable with other techniques. By  
49  
50 550 combining miniaturised MS technology with APCI techniques, adequate quality of on-site, real time  
51  
52 551 measurements with minimal or no sample preparation requirement can be provided. This is a desirable  
53  
54 552 outcome as it overcomes main limitation of using standard breath analysis method in clinical setting,  
55  
56  
57  
58  
59  
60



1  
2  
3 553 which is a need for breath sample collection followed by desorption and time-consuming laboratory  
4  
5 554 analysis.

6  
7 587 There remains an overall lack of standardisation and rigour across these technologies which hindered  
8  
9 588 previous advancements in breath discovery; something we intend to minimize.

#### 11 12 589 **4. Chemometric processing and data analysis:**

13  
14 590 GC-MS breath data will be aligned, deconvoluted and the features for each participant will be  
15  
16 591 extracted. The extracted features will be grouped and classified by retention index and mass spectrum.  
17  
18 592 The registered and aligned data will be linked to participant meta-data to generate a breath matrix.

19  
20  
21 593 The breath matrix is a  $n \times p$  matrix where  $n$  is the number of subjects and  $p$  is the number of VOC. The  
22  
23 594 breath matrix is high dimensional with  $p \gg n$  and many potentially correlated VOC. In view of this, we  
24  
25 595 will employ sparse partial least squares discriminant analysis (sPLS-DA)[69] to investigate which of  
26  
27 596 the VOC can identify breathlessness. We will also investigate which of the VOC can discriminate  
28  
29 597 between the different disease states including acute exacerbations of asthma and COPD and  
30  
31 598 Pneumonia. In addition to the supervised methods, unsupervised methods will be explored,  
32  
33 599 specifically sparse principle component analysis (sPCA)[70].

34  
35  
36 600 Extracted VOC will also be investigated. Relationships between VOC and patient reported acute  
37  
38 601 breathlessness will be analysed using logistic regression model. VOC associated with patient  
39  
40 602 associated acute breathlessness will be incorporated into multinomial logistic regression models in  
41  
42 603 conjunction with CRP, BNP, blood eosinophils and Troponin-I, pathology biomarkers currently in use  
43  
44 604 for diagnosing undifferentiated breathlessness. In addition to the conventional binary and multinomial  
45  
46 605 logistic regression models, regression models [71].

#### 47 48 49 606 **5. Ethics and dissemination:**

50  
51  
52 607 The study has obtained full ethical approval from the London South East Research ethics Committee,  
53  
54 608 REC reference 16/LO/1747. IRAS project ID 198921. Publications will be prepared according to the  
55  
56 609 MRC-EMBER consortium agreement and the University of Leicester publications policy. All

1  
2  
3 610 intended publications will be submitted to the EMBER executive board for review and comments  
4  
5 611 within 60 days of journal submission. Authorship will be according to contribution and internationally  
6  
7 612 recognised guidance on journal authorship.  
8  
9

10 613 **6. Study dates:** 01/2/2017 – 30/10/2020  
11

#### 12 614 **7. Authors' contributions:**

13  
14 615 WI and SS drafted the manuscript and all co-authors critically revised and contributed to the  
15  
16 616 manuscript. All co-authors contributed to the study design and development. SS is the Chief  
17  
18 617 investigator for the acute VOC study.  
19

20 618

21  
22 619 **Protocol version:** Version 4, 1<sup>st</sup> April 2018  
23  
24

25 620

#### 26 27 621 **Funding statement:**

28  
29 622 This study has been funded by the Medical research Council (MRC) and Engineering and Physical  
30  
31 623 Sciences Research Council (EPSRC) and is sponsored by the University of Leicester. The children's  
32  
33 624 component of this study is also being supported by The Midlands Asthma and Allergy Research  
34  
35 625 Association (MAARA). Grant number [MR/N005880/1]  
36  
37

38 626 **Competing interests:** SS has performed advisory services for Owlstone Medical.  
39

40 627

41  
42 628

43  
44 629

45 630

46  
47 631

48  
49 632

50 633

51  
52 634

53  
54 635

55 636  
56  
57  
58  
59  
60

1  
2  
3 637  
4 638  
5  
6 639  
7  
8 640  
9  
10 641

11 **Figure legends:**

12  
13 **Figure (1)** Relationship between lung proximity and degree of invasiveness of different lung  
14  
15 matrices. The figure plots the level of invasiveness of various lung matrices in relation to their  
16  
17 proximity to the lung. Given their pathological relevance, the degree of invasiveness of  
18  
19 bronchoalveolar lavage (BAL) and lung biopsy makes them less favourable in diagnosing respiratory  
20  
21 diseases.  
22

23  
24 **Figure (2)** Multi-instrument use in breath sampling. Figure illustrates the various combinations of  
25  
26 offline and online devices used in breath sampling and the relevant pros and cons. Offline and online  
27  
28 technologies are used for the discovery and validation phases of the study respectively.  
29

30  
31 **Figure (3)** Study flow chart. Figure outlines the patient journey from admission through to discharge  
32  
33 and follow up. Participants with self-reported acute breathlessness presenting to University Hospitals  
34  
35 of Leicester are recruited within 24 hours following a senior decision maker review. Breath sampling  
36  
37 is carried out on the first visit, at recruitment, and the second visit, up to 6 months after discharge.  
38  
39 Patients are admitted through the standard operational emergency medical streaming and care  
40  
41 pathways at the University Hospitals of Leicester NHS Trust. Early outcomes (hospital readmission)  
42  
43 are measured at 30 and 60 days and late outcomes (mortality) including respiratory and all-cause  
44  
45 mortality are measured at 2 years. Assessments carried out at each time point are summarised in  
46

47 **Table 1.**

48  
49 **Figure (4)** Multi-instrument use in breath sampling. Operational space of the analytical technologies  
50  
51 used in EMBER for the analysis of volatile organic compounds (VOC) in exhaled breath, including  
52  
53 proton transfer reaction-mass spectrometry (PTR-MS), atmospheric pressure chemical ionisation-  
54  
55 mass spectrometry (CMS), gas chromatography-ion mobility spectrometry (GC-IMS), gas  
56  
57

1  
2  
3 664 chromatography-mass spectrometry (GC-MS) and two-dimensional gas chromatography-mass  
4  
5 665 spectrometry (GCxGC). Comparing the typical molar mass range detectable; selectivity in detection  
6  
7 666 owing to the type of ionisation involved and the proton affinity of analytes; and the inclusion of a  
8  
9 667 chromatographic separation affecting total time of analysis. The online technologies involving  
10  
11 668 chemical ionisation (PTR-MS, CMS and GC-IMS) can be used in-clinic owing to short analysis  
12  
13 669 times, but only detect lower molar mass molecules with a proton affinity higher than 697 KJ mol<sup>-1</sup>.  
14  
15 670 Offline chromatographic techniques (GC-MS and GCxGC) detect a wider range of compounds  
16  
17 671 independent of proton affinity; however, the techniques have longer analysis times and involve  
18  
19 672 sample transportation and storage.

20  
21 673

22  
23 674

24  
25 675

26  
27 676

28  
29 677

30  
31 678

32  
33 679

34  
35 680

36  
37 681

38  
39 682

40  
41 683

42  
43 684

44  
45 685

46  
47 686

48  
49 687

50  
51 688

52  
53 689

54  
55 690

691

692

693

694

695 **8. References**

- 696 1. Stephenson, J.J., et al., *Clinical and economic burden of dyspnea and other COPD symptoms*  
697 *in a managed care setting*. Int J Chron Obstruct Pulmon Dis, 2017. **12**: p. 1947-1959.
- 698 2. David Ponka, M.K., *Top differential diagnoses in family medicine Dyspnoea Can Fam*  
699 *Physician*. Canadian Family Physician, 2008.
- 700 3. Figarska, S.M., H.M. Boezen, and J.M. Vonk, *Dyspnea severity, changes in dyspnea status and*  
701 *mortality in the general population: the Vlagtwedde/Vlaardingen study*. European Journal of  
702 Epidemiology, 2012. **27**(11): p. 867-876.
- 703 4. Parshall, M.B., et al., *An Official American Thoracic Society Statement: Update on the*  
704 *Mechanisms, Assessment, and Management of Dyspnea*. American Journal of Respiratory  
705 and Critical Care Medicine, 2012. **185**(4): p. 435-452.
- 706 5. Lim, W.S., et al., *BTS guidelines for the management of community acquired pneumonia in*  
707 *adults: update 2009*. Thorax, 2009. **64 Suppl 3**: p. iii1-55.
- 708 6. Leuzzi, G., et al., *C-reactive protein level predicts mortality in COPD: a systematic review and*  
709 *meta-analysis*. Eur Respir Rev, 2017. **26**(143).
- 710 7. Moe, G.W., *B-type natriuretic peptide in heart failure*. Curr Opin Cardiol, 2006. **21**(3): p. 208-  
711 14.
- 712 8. Ponikowski, P., et al., *2016 ESC Guidelines for the diagnosis and treatment of acute and*  
713 *chronic heart failure: The Task Force for the diagnosis and treatment of acute and chronic*  
714 *heart failure of the European Society of Cardiology (ESC) Developed with the special*  
715 *contribution of the Heart Failure Association (HFA) of the ESC*. Eur Heart J, 2016. **37**(27): p.  
716 2129-2200.
- 717 9. Alex Sakula, *Charcot leyden crystals and crushmann spirals*. Thorax, 1986.
- 718 10. Calhoun, W.J., J. Sedgwick, and W.W. Busse, *The role of eosinophils in the pathophysiology of*  
719 *asthma*. Ann N Y Acad Sci, 1991. **629**: p. 62-72.
- 720 11. Pavord, I.D., *Eosinophilic phenotypes of airway disease*. Ann Am Thorac Soc, 2013. **10 Suppl**:  
721 p. S143-9.
- 722 12. Tashkin, D.P. and M.E. Wechsler, *Role of eosinophils in airway inflammation of chronic*  
723 *obstructive pulmonary disease*. International Journal of Chronic Obstructive Pulmonary  
724 Disease, 2018. **13**: p. 335-349.
- 725 13. Bafadhel, M., et al., *Blood Eosinophils to Direct Corticosteroid Treatment of Exacerbations of*  
726 *Chronic Obstructive Pulmonary Disease: A Randomized Placebo-Controlled Trial*. American  
727 Journal of Respiratory and Critical Care Medicine, 2012. **186**(1): p. 48-55.
- 728 14. Bedossa, P. and K. Patel, *Biopsy and Noninvasive Methods to Assess Progression of*  
729 *Nonalcoholic Fatty Liver Disease*. Gastroenterology, 2016. **150**(8): p. 1811-1822 e4.
- 730 15. Fens, N., et al., *Exhaled breath analysis by electronic nose in airways disease. Established*  
731 *issues and key questions*. Clin Exp Allergy, 2013. **43**(7): p. 705-15.
- 732 16. Probert, C.S., et al., *Volatile organic compounds as diagnostic biomarkers in gastrointestinal*  
733 *and liver diseases*. J Gastrointestin Liver Dis, 2009. **18**(3): p. 337-43.
- 734 17. Schubert, J.K., et al., *Breath analysis in critically ill patients: potential and limitations*. Expert  
735 Rev Mol Diagn, 2004. **4**(5): p. 619-29.

- 1  
2  
3 736 18. Fowler, S.J., et al., *Surveillance for lower airway pathogens in mechanically ventilated*  
4 737 *patients by metabolomic analysis of exhaled breath: a case-control study*. Thorax, 2015.  
5 738 **70**(4): p. 320-5.
- 6 739 19. Florian Gahleitner, C.G.-H., Caroline S Beardsmore, Hitesh C Pandya, CL Paul Thomas,  
7 740 *Metabolomics pilot study to identify VOC of childhood asthma in exhaled breath*. Bioanalysis,  
8 741 2013.
- 9 742 20. Christiansen, A., et al., *A systematic review of breath analysis and detection of volatile*  
10 743 *organic compounds in COPD*. J Breath Res, 2016. **10**(3): p. 034002.
- 11 744 21. de Vries, R., et al., *Integration of electronic nose technology with spirometry: validation of a*  
12 745 *new approach for exhaled breath analysis*. J Breath Res, 2015. **9**(4): p. 046001.
- 13 746 22. Shafiek, H., et al., *Using the Electronic Nose to Identify Airway Infection during COPD*  
14 747 *Exacerbations*. PLoS One, 2015. **10**(9): p. e0135199.
- 15 748 23. Finamore, P., et al., *Analysis of volatile organic compounds: an innovative approach to heart*  
16 749 *failure characterization in older patients*. J Breath Res, 2018. **12**(2): p. 026007.
- 17 750 24. MRC Molecular Pathology, Review 20 Aug.
- 18 751 25. Medical Research Council, *Molecular Pathology Nodes*. 2014: MRC website.
- 19 752 26. Corradi, M., et al., *Aldehydes in exhaled breath condensate of patients with chronic*  
20 753 *obstructive pulmonary disease*. Am J Respir Crit Care Med, 2003. **167**(10): p. 1380-6.
- 21 754 27. Ibrahim, B., et al., *Non-invasive phenotyping using exhaled volatile organic compounds in*  
22 755 *asthma*. Thorax, 2011. **66**(9): p. 804-9.
- 23 756 28. Larstad, M., et al., *Determination of malondialdehyde in breath condensate by high-*  
24 757 *performance liquid chromatography with fluorescence detection*. J Chromatogr B Analyt  
25 758 Technol Biomed Life Sci, 2002. **766**(1): p. 107-14.
- 26 759 29. F. Y. Hsieh, D.A.B., Michael D. Larsen,, *A simple method of sample size calculation for linear*  
27 760 *and logistic regression* Statis Med, 1998.
- 28 761 30. Hajian-Tilaki, K., *Sample size estimation in diagnostic test studies of biomedical informatics*. J  
29 762 Biomed Inform, 2014. **48**: p. 193-204.
- 30 763 31. Quan, H., et al., *Updating and validating the Charlson comorbidity index and score for risk*  
31 764 *adjustment in hospital discharge abstracts using data from 6 countries*. Am J Epidemiol,  
32 765 2011. **173**(6): p. 676-82.
- 33 766 32. Roffman, C.E., J. Buchanan, and G.T. Allison, *Charlson Comorbidities Index*. J Physiother,  
34 767 2016. **62**(3): p. 171.
- 35 768 33. Bjarnason, H. and P. Hougaard, *Fisher information for two gamma frailty bivariate Weibull*  
36 769 *models*. Lifetime Data Anal, 2000. **6**(1): p. 59-71.
- 37 770 34. Lawrence Gould, A., et al., *Joint modeling of survival and longitudinal non-survival data:*  
38 771 *current methods and issues. Report of the DIA Bayesian joint modeling working group*. Stat  
39 772 Med, 2015. **34**(14): p. 2181-95.
- 40 773 35. Steer, J., et al., *Dyspnoea severity and pneumonia as predictors of in-hospital mortality and*  
41 774 *early readmission in acute exacerbations of COPD*. Thorax, 2012. **67**(2): p. 117-21.
- 42 775 36. Tsimogianni, A.M., et al., *Predictors of Outcome After Exacerbation of Chronic Obstructive*  
43 776 *Pulmonary Disease*. Journal of General Internal Medicine, 2009. **24**(9): p. 1043-1048.
- 44 777 37. Kitchen, S., et al., *LATE-BREAKING ABSTRACT: Breathe free: Open source development of a*  
45 778 *breath sampler by a consortium of breath researchers*. European Respiratory Journal, 2015.  
46 779 **46**(suppl 59).
- 47 780 38. Oostveen, E., et al., *The forced oscillation technique in clinical practice: methodology,*  
48 781 *recommendations and future developments*. Eur Respir J, 2003. **22**(6): p. 1026-41.
- 49 782 39. Pendharkar, S. and S. Mehta, *The clinical significance of exhaled nitric oxide in asthma*.  
50 783 Canadian Respiratory Journal : Journal of the Canadian Thoracic Society, 2008. **15**(2): p. 99-  
51 784 106.
- 52 785 40. Yates, D.H., *Role of exhaled nitric oxide in asthma*. Immunol Cell Biol, 2001. **79**(2): p. 178-90.
- 53  
54  
55  
56  
57  
58  
59  
60



- 1  
2  
3 786 41. Lang, R.M., et al., *Recommendations for chamber quantification: a report from the American*  
4 787 *Society of Echocardiography's Guidelines and Standards Committee and the Chamber*  
5 788 *Quantification Writing Group, developed in conjunction with the European Association of*  
6 789 *Echocardiography, a branch of the European Society of Cardiology.* J Am Soc Echocardiogr,  
7 790 2005. **18**(12): p. 1440-63.
- 8 791 42. J. Throck Watson, O.D.S., *Introduction to Mass Spectrometry: Instrumentation, Applications,*  
9 792 *and Strategies for Data Interpretation, 4th Edition.* 2007: Wiley. 862.
- 10 793 43. Buszewski, B., et al., *Human exhaled air analytics: biomarkers of diseases.* Biomed  
11 794 Chromatogr, 2007. **21**(6): p. 553-66.
- 12 795 44. Amann, A., et al., *Applications of breath gas analysis in medicine.* International Journal of  
13 796 Mass Spectrometry, 2004. **239**(2-3): p. 227-233.
- 14 797 45. Almstetter, M.F., P.J. Oefner, and K. Dettmer, *Comprehensive two-dimensional gas*  
15 798 *chromatography in metabolomics.* Anal Bioanal Chem, 2012. **402**(6): p. 1993-2013.
- 16 799 46. Das, M.K., et al., *Investigation of Gender-Specific Exhaled Breath Volatome in Humans by*  
17 800 *GCxGC-TOF-MS.* Analytical Chemistry, 2014. **86**(2): p. 1229-1237.
- 18 801 47. Phillips, M., et al., *Detection of an extended human volatome with comprehensive two-*  
19 802 *dimensional gas chromatography time-of-flight mass spectrometry.* PLoS One, 2013. **8**(9): p.  
20 803 e75274.
- 21 804 48. Gruber, B., et al., *Vacuum ultraviolet absorption spectroscopy in combination with*  
22 805 *comprehensive two-dimensional gas chromatography for the monitoring of volatile organic*  
23 806 *compounds in breath gas: A feasibility study.* J Chromatogr A, 2016. **1464**: p. 141-6.
- 24 807 49. Gruber, B., et al., *Breath gas monitoring during a glucose challenge by a combined PTR-*  
25 808 *QMS/GCxGC-TOFMS approach for the verification of potential volatile biomarkers.* J Breath  
26 809 Res, 2016. **10**(3): p. 036003.
- 27 810 50. Mellors, T.R., et al., *A new method to evaluate macaque health using exhaled breath: A case*  
28 811 *study of M. tuberculosis in a BSL-3 setting.* J Appl Physiol (1985), 2017. **122**(3): p. 695-701.
- 29 812 51. Phillips, M., et al., *Breath biomarkers of whole-body gamma irradiation in the Gottingen*  
30 813 *minipig.* Health Phys, 2015. **108**(5): p. 538-46.
- 31 814 52. Bajtarevic, A., et al., *Noninvasive detection of lung cancer by analysis of exhaled breath.* BMC  
32 815 Cancer, 2009. **9**: p. 348.
- 33 816 53. Lavra, L., et al., *Investigation of VOCs associated with different characteristics of breast*  
34 817 *cancer cells.* Sci Rep, 2015. **5**: p. 13246.
- 35 818 54. Zhou, W., et al., *Exhaled breath online measurement for cervical cancer patients and healthy*  
36 819 *subjects by proton transfer reaction mass spectrometry.* Anal Bioanal Chem, 2017. **409**(23):  
37 820 p. 5603-5612.
- 38 821 55. Fernández del Río, R., et al., *Volatile Biomarkers in Breath Associated With Liver Cirrhosis —*  
39 822 *Comparisons of Pre- and Post-liver Transplant Breath Samples.* EBioMedicine, 2015. **2**(9): p.  
40 823 1243-1250.
- 41 824 56. O'Hara, M.E., et al., *Limonene in exhaled breath is elevated in hepatic encephalopathy.* J  
42 825 Breath Res, 2016. **10**(4): p. 046010.
- 43 826 57. Tomasz Ligor, C.A., Anton Amann, Konrad Schwarz, Bogusaw Buszewski, Wojciech ebrowski,,  
44 827 *<Comparison of Proton Transfer Reaction-Mass Spectrometry and Gas Chromatography-*  
45 828 *Mass Spectrometry in Analysis of Breath Samples.pdf>.* Chem. Anal., 2009.
- 46 829 58. Darwiche, K., et al., *Bronchoscopically obtained volatile biomarkers in lung cancer.* Lung,  
47 830 2011. **189**(6): p. 445-52.
- 48 831 59. Handa, H., et al., *Exhaled Breath Analysis for Lung Cancer Detection Using Ion Mobility*  
49 832 *Spectrometry.* PLoS ONE, 2014. **9**(12): p. e114555.
- 50 833 60. Bessa, V., et al., *Detection of volatile organic compounds (VOCs) in exhaled breath of patients*  
51 834 *with chronic obstructive pulmonary disease (COPD) by ion mobility spectrometry.*  
52 835 International Journal for Ion Mobility Spectrometry, 2011. **14**(1): p. 7-13.

- 1  
2  
3 836 61. Schivo, M., et al., *Mobile instrumentation platform to distinguish airway disorders*. Journal of  
4 837 breath research, 2013. **7**(1): p. 017113-017113.
- 5 838 62. Badjagbo, K., et al., *Direct atmospheric pressure chemical ionization-tandem mass*  
6 839 *spectrometry for the continuous real-time trace analysis of benzene, toluene, ethylbenzene,*  
7 840 *and xylenes in ambient air*. J Am Soc Mass Spectrom, 2009. **20**(5): p. 829-36.
- 8 841 63. Healy, R.M., et al., *A multi-year study of VOC emissions at a chemical waste disposal facility*  
9 842 *using mobile APCI-MS and LPCI-MS instruments*. Environ Pollut, 2018. **232**: p. 220-228.
- 10 843 64. Linforth, R. and A.J. Taylor, *Persistence of Volatile Compounds in the Breath after Their*  
11 844 *Consumption in Aqueous Solutions*. Journal of Agricultural and Food Chemistry, 2000. **48**(11):  
12 845 p. 5419-5423.
- 13 846 65. Perez-Hurtado, P., et al., *Direct analysis of volatile organic compounds in foods by headspace*  
14 847 *extraction atmospheric pressure chemical ionisation mass spectrometry*. Rapid Commun  
15 848 Mass Spectrom, 2017. **31**(22): p. 1947-1956.
- 16 849 66. Berchtold, C., L. Meier, and R. Zenobi, *Evaluation of extractive electrospray ionization and*  
17 850 *atmospheric pressure chemical ionization for the detection of narcotics in breath*.  
18 851 International Journal of Mass Spectrometry, 2011. **299**(2-3): p. 145-150.
- 19 852 67. Kapishon, V., et al., *Atmospheric pressure chemical ionization mass spectrometry of pyridine*  
20 853 *and isoprene: potential breath exposure and disease biomarkers*. J Breath Res, 2013. **7**(2): p.  
21 854 026005.
- 22 855 68. Heaney, L.M., et al., *Real-time monitoring of exhaled volatiles using atmospheric pressure*  
23 856 *chemical ionization on a compact mass spectrometer*. Bioanalysis, 2016. **8**(13): p. 1325-36.
- 24 857 69. Lê Cao, K.-A., S. Boitard, and P. Besse, *Sparse PLS discriminant analysis: biologically relevant*  
25 858 *feature selection and graphical displays for multiclass problems*. BMC Bioinformatics, 2011.  
26 859 **12**: p. 253-253.
- 27 860 70. Zou, H., T. Hastie, and R. Tibshirani, *Sparse Principal Component Analysis*. Journal of  
28 861 Computational and Graphical Statistics, 2006. **15**(2): p. 265-286.
- 29 862 71. Zou H, H.T., *Regularization and Variable Selection via the Elastic Net*. Journal of the Royal  
30 863 Statistical Society, 2005.

864



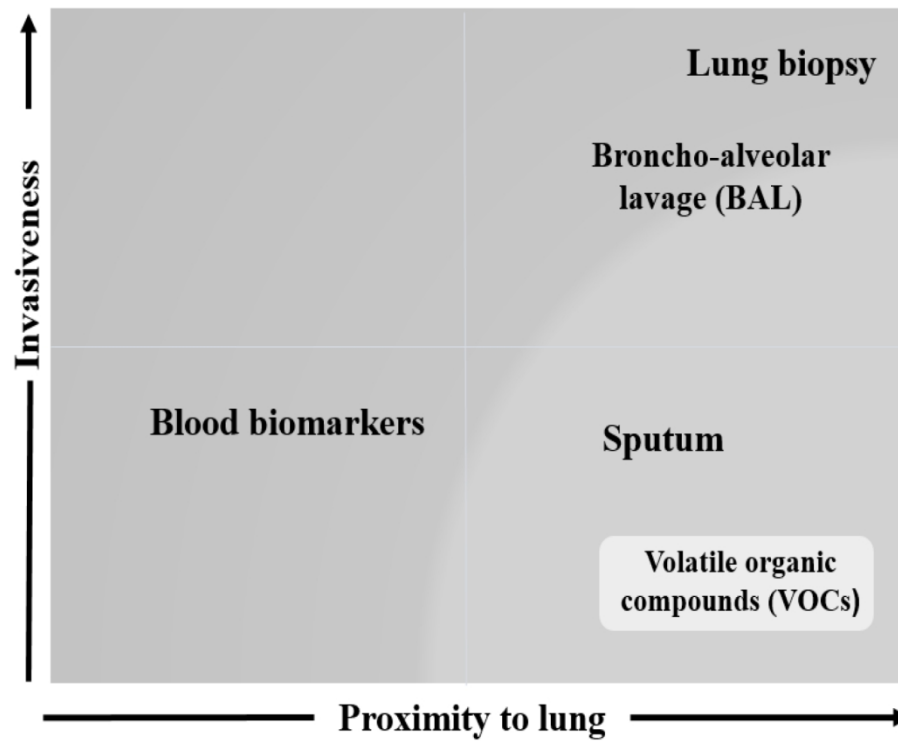

Figure (1): Relationship between lung proximity and degree of invasiveness of different lung matrices. The figure plots the level of invasiveness of various lung matrices in relation to their proximity to the lung. Given their pathological relevance, the degree of invasiveness of bronchoalveolar lavage (BAL) and lung biopsy makes them less favourable in diagnosing respiratory diseases.

144x115mm (300 x 300 DPI)

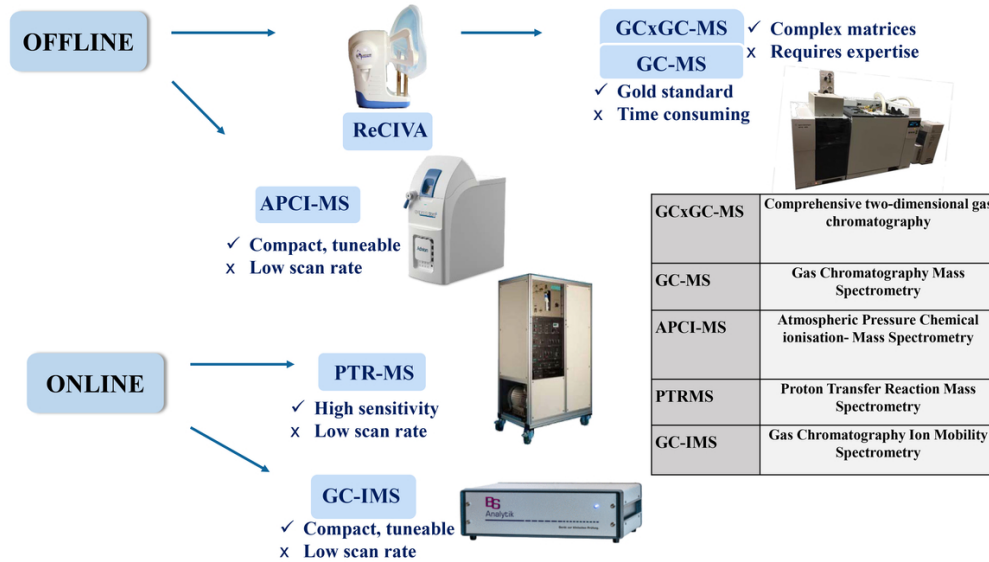

Figure (2): Multi-instrument use in breath sampling. Figure illustrates the various combinations of offline and online devices used in breath sampling and the relevant pros and cons. Offline and online technologies are used for the discovery and validation phases of the study respectively.

97x55mm (300 x 300 DPI)

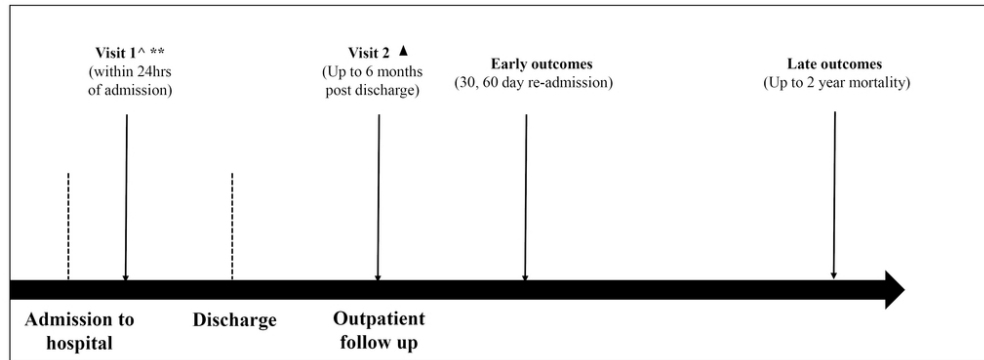

- ^ Following senior decision maker review  
 \*\* Breath sampling (ReCIVA-GC-MS, ReCIVA- GCxGC-MS, GC-IMS, APCI-MS)  
 ▲ Breath sampling (ReCIVA-GC-MS, ReCIVA- GCxGC-MS, PTR-MS, APCI-MS)  
 ---- Following University Hospitals of Leicester streaming and clinical care pathways

Figure (3): Study flow chart. Figure outlines the patient journey from admission through to discharge and follow up. Participants with self-reported acute breathlessness presenting to University Hospitals of Leicester are recruited within 24 hours following a senior decision maker review. Breath sampling is carried out on the first visit, at recruitment, and the second visit, up to 6 months after discharge. Patients are admitted through the standard operational emergency medical streaming and care pathways at the University Hospitals of Leicester NHS Trust. Early outcomes (hospital readmission) are measured at 30 and 60 days and late outcomes (mortality) including respiratory and all-cause mortality are measured at 2 years. Assessments carried out at each time point are summarised in Table 1.

86x43mm (300 x 300 DPI)

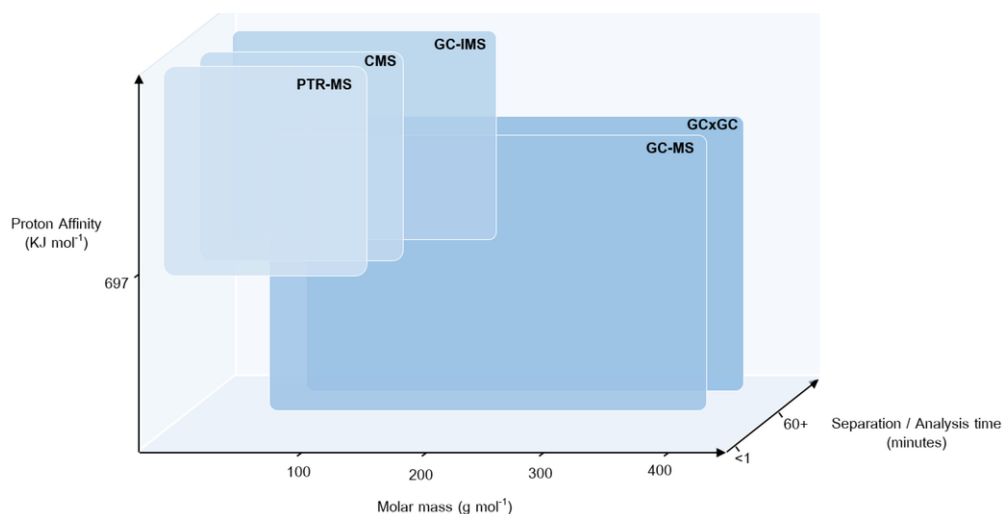

Figure (4): Multi-instrument use in breath sampling. Operational space of the analytical technologies used in EMBER for the analysis of volatile organic compounds (VOC) in exhaled breath, including proton transfer reaction-mass spectrometry (PTR-MS), atmospheric pressure chemical ionisation-mass spectrometry (CMS), gas chromatography-ion mobility spectrometry (GC-IMS), gas chromatography-mass spectrometry (GC-MS) and two-dimensional gas chromatography-mass spectrometry (GCxGC). Comparing the typical molar mass range detectable; selectivity in detection owing to the type of ionisation involved and the proton affinity of analytes; and the inclusion of a chromatographic separation affecting total time of analysis. The online technologies involving chemical ionisation (PTR-MS, CMS and GC-IMS) can be used in-clinic owing to short analysis times, but only detect lower molar mass molecules with a proton affinity higher than 697 KJ mol<sup>-1</sup>. Offline chromatographic techniques (GC-MS and GCxGC) detect a wider range of compounds independent of proton affinity; however, the techniques have longer analysis times and involve sample transportation and storage.

88x44mm (300 x 300 DPI)

# BMJ Open

## Assessment of Breath Volatile Organic Compounds in Acute Cardio-respiratory Breathlessness: A protocol describing a Prospective Real World Observational Study

|                               |                                                                                                                                                                                                                                                                                                                                                                                                                                                                                                                                                                                                                                                                                                                                                                                                                                                                                                                                                                                                                                                                                                                                                                                                                                                                                                                                                                                                                                                                                                                                                                                                                                                                                                                                                                                                                                                                                                                                                                                                                                                                                                                                                                                                                                                                                                                                                                                           |
|-------------------------------|-------------------------------------------------------------------------------------------------------------------------------------------------------------------------------------------------------------------------------------------------------------------------------------------------------------------------------------------------------------------------------------------------------------------------------------------------------------------------------------------------------------------------------------------------------------------------------------------------------------------------------------------------------------------------------------------------------------------------------------------------------------------------------------------------------------------------------------------------------------------------------------------------------------------------------------------------------------------------------------------------------------------------------------------------------------------------------------------------------------------------------------------------------------------------------------------------------------------------------------------------------------------------------------------------------------------------------------------------------------------------------------------------------------------------------------------------------------------------------------------------------------------------------------------------------------------------------------------------------------------------------------------------------------------------------------------------------------------------------------------------------------------------------------------------------------------------------------------------------------------------------------------------------------------------------------------------------------------------------------------------------------------------------------------------------------------------------------------------------------------------------------------------------------------------------------------------------------------------------------------------------------------------------------------------------------------------------------------------------------------------------------------|
| Journal:                      | <i>BMJ Open</i>                                                                                                                                                                                                                                                                                                                                                                                                                                                                                                                                                                                                                                                                                                                                                                                                                                                                                                                                                                                                                                                                                                                                                                                                                                                                                                                                                                                                                                                                                                                                                                                                                                                                                                                                                                                                                                                                                                                                                                                                                                                                                                                                                                                                                                                                                                                                                                           |
| Manuscript ID                 | bmjopen-2018-025486.R1                                                                                                                                                                                                                                                                                                                                                                                                                                                                                                                                                                                                                                                                                                                                                                                                                                                                                                                                                                                                                                                                                                                                                                                                                                                                                                                                                                                                                                                                                                                                                                                                                                                                                                                                                                                                                                                                                                                                                                                                                                                                                                                                                                                                                                                                                                                                                                    |
| Article Type:                 | Protocol                                                                                                                                                                                                                                                                                                                                                                                                                                                                                                                                                                                                                                                                                                                                                                                                                                                                                                                                                                                                                                                                                                                                                                                                                                                                                                                                                                                                                                                                                                                                                                                                                                                                                                                                                                                                                                                                                                                                                                                                                                                                                                                                                                                                                                                                                                                                                                                  |
| Date Submitted by the Author: | 11-Oct-2018                                                                                                                                                                                                                                                                                                                                                                                                                                                                                                                                                                                                                                                                                                                                                                                                                                                                                                                                                                                                                                                                                                                                                                                                                                                                                                                                                                                                                                                                                                                                                                                                                                                                                                                                                                                                                                                                                                                                                                                                                                                                                                                                                                                                                                                                                                                                                                               |
| Complete List of Authors:     | <p>Ibrahim, Wadah; Leicester NIHR Biomedical Research Centre (Respiratory theme); College of Life Sciences, Department of Infection, Immunity and Inflammation, University of Leicester</p> <p>Wilde, Michael; University of Leicester, Department of Chemistry</p> <p>Cordell, Rebecca; University of Leicester, Department of Chemistry</p> <p>Salman, Dahlia; Loughborough University, Department of Chemistry</p> <p>Ruszkiewicz, Dorota; Loughborough University, Department of Chemistry</p> <p>Bryant, Luke; University of Leicester, Department of Chemistry</p> <p>Richardson, Matthew; Leicester NIHR Biomedical Research Centre (Respiratory theme); University of Leicester, Infection, Inflammation and Immunity</p> <p>Free, Robert; Leicester NIHR Biomedical Research Centre (Respiratory theme); University of Leicester, Infection, Inflammation and Immunity</p> <p>Zhao, Bo; Leicester NIHR Biomedical Research Centre (Respiratory theme); University of Leicester, Infection, Inflammation and Immunity</p> <p>Yousuf, Ahmed; University of Leicester, Infection, Inflammation and Immunity; Leicester NIHR Biomedical Research Centre (Respiratory theme)</p> <p>White, Christobelle; University of Leicester, Infection, Inflammation and Immunity; Leicester NIHR Biomedical Research Centre (Respiratory theme)</p> <p>Russell, Richard; University of Leicester, Infection, Inflammation and Immunity; Leicester NIHR Biomedical Research Centre (Respiratory theme)</p> <p>Jones, Sheila; University Hospitals of Leicester NHS Trust</p> <p>Patel, Bharti; University Hospitals of Leicester NHS Trust</p> <p>Awal, Asia; University Hospitals of Leicester NHS Trust</p> <p>Phillips, Rachael; NIHR Leicester Clinical Research Facility</p> <p>Fowkes, Graham; NIHR Leicester Clinical Research Facility</p> <p>McNally, Teresa; Paediatric Clinical Investigation Centre</p> <p>Foxon, Clare; Paediatric Clinical Investigation Centre</p> <p>Bhatt, Hetan; Leicester NIHR Biomedical Research Centre (Respiratory theme)</p> <p>Peltrini, Rosa; Leicester NIHR Biomedical Research Centre (Respiratory theme); University of Leicester, Department Infection, Inflammation and Immunity</p> <p>Singapuri, Amisha; Leicester NIHR Biomedical Research Centre (Respiratory theme)</p> <p>Hargadon, Beverley; Leicester NIHR Biomedical Research Centre</p> |

|                                 |                                                                                                                                                                                                                                                                                                                                                                                                                                                                                                                                                                                                                                                                                                                                                                                                                                                                                                                                                                                                                                                                                                                                                                                                                                                                                                                                                                                                                                                                                                                                                                                                                                                                                   |
|---------------------------------|-----------------------------------------------------------------------------------------------------------------------------------------------------------------------------------------------------------------------------------------------------------------------------------------------------------------------------------------------------------------------------------------------------------------------------------------------------------------------------------------------------------------------------------------------------------------------------------------------------------------------------------------------------------------------------------------------------------------------------------------------------------------------------------------------------------------------------------------------------------------------------------------------------------------------------------------------------------------------------------------------------------------------------------------------------------------------------------------------------------------------------------------------------------------------------------------------------------------------------------------------------------------------------------------------------------------------------------------------------------------------------------------------------------------------------------------------------------------------------------------------------------------------------------------------------------------------------------------------------------------------------------------------------------------------------------|
|                                 | (Respiratory theme); University of Leicester, Infection, Inflammation and Immunity<br>Suzuki, T; Department of Cardiovascular Sciences, University of Leicester, , Cardiovascular Research Centre; Leicester NIHR Biomedical Research Centre (Cardiovascular theme)<br>Ng, Leong; Department of Cardiovascular Sciences, University of Leicester, Cardiovascular Research Centre; Leicester NIHR Biomedical Research Centre (Cardiovascular theme)<br>Gaillard, Erol; Leicester NIHR Biomedical Research Centre (Respiratory theme); Paediatric Clinical Investigation Centre<br>Beardsmore, Caroline; Leicester NIHR Biomedical Research Centre (Respiratory theme); Paediatric Clinical Investigation Centre<br>Ryanna, Kimuli; University Hospitals of Leicester NHS Trust<br>Pandya, Hitesh; Discovery Medicine, Respiratory Therapeutic Area, GlaxoSmithKline PLC<br>Coates, Tim; University of Leicester, Infection, Inflammation and Immunity; Department of Cardiovascular Sciences, University of Leicester<br>Monks, Paul; University of Leicester, Infection, Inflammation and Immunity; University of Leicester, Department of Chemistry<br>Greening, Neil; Leicester NIHR Biomedical Research Centre (Respiratory theme); University of Leicester, Infection, Inflammation and Immunity<br>Brightling, Christopher; Leicester NIHR Biomedical Research Centre (Respiratory theme); University of Leicester, Infection, Inflammation and Immunity<br>Thomas, Paul; Loughborough University, Department of Chemistry<br>Siddiqui, Salman; Leicester NIHR Biomedical Research Centre (Respiratory theme); University of Leicester, Infection, Inflammation and Immunity |
| <b>Primary Subject Heading</b>: | Respiratory medicine                                                                                                                                                                                                                                                                                                                                                                                                                                                                                                                                                                                                                                                                                                                                                                                                                                                                                                                                                                                                                                                                                                                                                                                                                                                                                                                                                                                                                                                                                                                                                                                                                                                              |
| Secondary Subject Heading:      | Research methods, Respiratory medicine                                                                                                                                                                                                                                                                                                                                                                                                                                                                                                                                                                                                                                                                                                                                                                                                                                                                                                                                                                                                                                                                                                                                                                                                                                                                                                                                                                                                                                                                                                                                                                                                                                            |
| Keywords:                       | Breathlessness, Observational study, Volatile Organic Compound, Breath analysis                                                                                                                                                                                                                                                                                                                                                                                                                                                                                                                                                                                                                                                                                                                                                                                                                                                                                                                                                                                                                                                                                                                                                                                                                                                                                                                                                                                                                                                                                                                                                                                                   |
|                                 |                                                                                                                                                                                                                                                                                                                                                                                                                                                                                                                                                                                                                                                                                                                                                                                                                                                                                                                                                                                                                                                                                                                                                                                                                                                                                                                                                                                                                                                                                                                                                                                                                                                                                   |

SCHOLARONE™  
Manuscripts

# 1                   **Assessment of Breath Volatile Organic Compounds in Acute Cardio-** 2                   **respiratory Breathlessness: A protocol describing a Prospective Real World** 3                   **Observational Study**

4  
5                   Wadah Ibrahim<sup>1,2</sup>, Michael Wilde<sup>3</sup>, Rebecca Cordell<sup>3</sup>, Dahlia Salman<sup>4</sup>, Dorota Ruszkiewicz<sup>4</sup>, Luke  
6                   Bryant<sup>3</sup>, Matthew Richardson<sup>1,2</sup>, Robert C. Free<sup>1,2</sup>, Bo Zhao<sup>1,2</sup>, Ahmed Yousuf<sup>1,2</sup>, Christobelle White<sup>1,2</sup>,  
7                   Richard J Russell<sup>1,2</sup>, Sheila Jones<sup>5</sup>, Bharti Patel<sup>5</sup>, Asia Awal<sup>5</sup>, Rachael Phillips<sup>6</sup>, Graham Fowkes<sup>6</sup>, Teresa  
8                   McNally<sup>7</sup>, Clare Foxon<sup>7</sup>, Hetan Bhatt<sup>1,2</sup>, Rosa Peltrini<sup>1,2</sup>, Amisha Singapuri<sup>1,2</sup>, Beverley Hargadon<sup>1,2</sup>,  
9                   Toru Suzuki<sup>8,9</sup>, Leong L. Ng<sup>8,9</sup>, Erol A Gaillard<sup>2,7</sup>, Caroline Beardsmore<sup>2,7</sup>, Kimuli Ryanna<sup>5</sup>, Hitesh  
10                  Pandya<sup>11</sup>, Tim Coates<sup>2,10</sup>, Paul S. Monks<sup>2,3</sup>, Neil Greening<sup>1,2</sup>, Chris E Brightling<sup>1,2</sup>, Paul Thomas<sup>4</sup>, Salman  
11                  Siddiqui<sup>1,2</sup>

12  
13  
14                  wadah.ibrahim@leicester.ac.uk; mjw77@leicester.ac.uk; rc145@leicester.ac.uk; d.salman@lboro.ac.uk;  
15                  d.m.ruszkiewicz2@lboro.ac.uk; lb368@leicester.ac.uk; mr251@leicester.ac.uk; rcf8@leicester.ac.uk;  
16                  bo.zhao@leicester.ac.uk; ajy7@leicester.ac.uk; cmjw3@leicester.ac.uk; rjr22@leicester.ac.uk;  
17                  rjr22@leicester.ac.uk; sheila.jones@uhl-tr.nhs.uk; bharti.m.patel@uhl-tr.nhs.uk; asia.awal@uhl-tr.nhs.uk;  
18                  rachael.phillips@uhl-tr.nhs.uk; graham.fowkes@uhl-tr.nhs.uk; tm23@leicester.ac.uk; clare.foxon@uhl-tr.nhs.uk;  
19                  hetan.bhatt@uhl-tr.nhs.uk; rp417@leicester.ac.uk; amisha.singapuri@uhl-tr.nhs.uk; beverley.hargadon@uhl-  
20                  tr.nhs.uk; ts263@le.ac.uk; lln1@le.ac.uk; eag15@leicester.ac.uk; csb@leicester.ac.uk; kimuli.ryanna@uhl-  
21                  tr.nhs.uk; hitesh.x.pandya@gsk.com; tim.coates@leicester.ac.uk; paul.monks@leicester.ac.uk;  
22                  neil.greening@leicester.ac.uk; ceb17@leicester.ac.uk; C.L.P.Thomas@lboro.ac.uk; ss338@leicester.ac.uk

23  
24                  Corresponding author: Professor Salman Siddiqui, ss338@leicester.ac.uk

25                  NIHR Leicester Biomedical Research Centre (Respiratory Theme)

26                  Glenfield Hospital,

27                  Groby Road

28                  Leicester

29                  LE3 9QP

30                  t: +44 116 256 3841

31                  e: ss338@leicester.ac.uk

## 32 33                  **Authors' affiliations:**

34                  <sup>1</sup>Leicester NIHR Biomedical Research Centre (Respiratory theme), Glenfield Hospital, Groby Road, Leicester LE3

35                  9QP

- 1  
2  
3 36 <sup>2</sup> College of Life Sciences, Department of Infection, Immunity and Inflammation, University of Leicester,  
4  
5 37 University Road, Leicester LE1 7RH  
6  
7 38 <sup>3</sup> Department of Chemistry, University of Leicester, University Road, Leicester, LE1 7RH  
8  
9 39 <sup>4</sup> Department of Chemistry, Loughborough University, Epinal Way, Loughborough, LE11 3TU  
10  
11 40 <sup>5</sup> University Hospitals of Leicester NHS Trust, Glenfield Hospital, Groby Road, Leicester LE3 9QP  
12  
13 41 <sup>6</sup> NIHR Leicester Clinical Research Facility, Research Space, Level 0, Balmoral Building, Leicester Royal  
14  
15 42 Infirmary, Infirmary Square, Leicester, LE1 5WW  
16  
17 43 <sup>7</sup> Paediatric Clinical Investigation Centre, Leicester Respiratory Biomedical Research Centre, University of  
18  
19 44 Leicester, Leicester Royal Infirmary, Leicester, LE2 7LX  
20  
21 45 <sup>8</sup> Department of Cardiovascular Sciences, University of Leicester, Cardiovascular Research Centre, Glenfield  
22  
23 46 General Hospital, Leicester LE3 9QP.  
24  
25 47 <sup>9</sup> Leicester NIHR Biomedical Research Centre (Cardiovascular theme), Glenfield Hospital, Groby Road, Leicester  
26  
27 48 LE3 9QP  
28  
29 49 <sup>10</sup> Department of Cardiovascular Sciences, University of Leicester, Level G, Jarvis building RMO, Infirmary Square,  
30  
31 50 Leicester LE1 5WW  
32  
33 51 <sup>11</sup> Discovery Medicine, Respiratory Therapeutic Area, GlaxoSmithKline PLC, Gunnels Wood Road, Stevenage,  
34  
35 52 Hertfordshire, SG1 2NY  
36  
37 53  
38  
39 54  
40  
41 55  
42  
43 56  
44  
45 57  
46  
47 58  
48  
49 59  
50  
51 60  
52  
53 61  
54  
55 62  
56  
57 63  
58  
59  
60



1  
2  
3 644  
5 656  
7 668  
9 6710  
11 6812  
13  
14 69 **Abstract**15  
16 70 **Introduction**

17 71 Patients presenting with acute undifferentiated breathlessness are commonly encountered in  
18 72 admissions units across the United Kingdom. Existing blood biomarkers have clinical utility in  
19 73 distinguishing patients with single organ pathologies but have poor discriminatory power in multi  
20 74 factorial presentations. Evaluation of volatile organic compounds (VOC) in exhaled breath offers the  
21 75 potential to develop biomarkers of disease states that underpin acute cardio-respiratory breathlessness,  
22 76 owing to their proximity to the cardio-respiratory system. To date there has been no systematic evaluation  
23 77 of VOC in acute cardio-respiratory breathlessness. The proposed study will seek to use both offline and  
24 78 online VOC technologies to evaluate the predictive value of VOC in identifying common conditions that  
25 79 present with acute cardio-respiratory breathlessness.

26  
27  
28  
29  
30  
31  
32  
33  
34  
35  
36  
37 80 **Methods and analysis**

38  
39  
40 81 A prospective real world observational study carried out across three acute admissions units within  
41 82 Leicestershire. Participants with self-reported acute breathlessness, with a confirmed primary diagnosis of  
42 83 either acute heart failure, community acquired pneumonia and acute exacerbation of asthma or COPD  
43 84 will be recruited within 24 hours of admission. Additionally, school age children admitted with severe  
44 85 asthma will be evaluated. All participants will undergo breath sampling on admission and upon recovery  
45 86 following discharge. A range of online technologies including: proton-transfer-reaction mass  
46 87 spectrometry (PTR-MS), gas chromatography ion mobility spectrometry (GC-IMS), atmospheric pressure  
47 88 chemical ionisation- mass spectrometry (APCI-MS) and offline technologies including gas

1  
2  
3 89 chromatography mass spectroscopy (GC-MS) and comprehensive two-dimensional gas chromatography-  
4  
5 90 mass spectrometry (GCxGC-MS) will be utilised for VOC discovery and replication. For offline  
6  
7 91 technologies a standardised CE marked breath sampling device (ReCIVA®) will be used. All recruited  
8  
9 92 participants will be characterised using existing blood biomarkers including C - reactive protein (CRP),  
10  
11 93 brain derived natriuretic peptide (BNP), Troponin-I and blood eosinophil levels and further evaluated  
12  
13 94 using a range of standardised questionnaires, lung function testing, sputum cell counts and other  
14  
15 95 diagnostic tests pertinent to acute disease.

### 18 96 **Ethics and dissemination**

19  
20  
21 97 The National Research Ethics Service Committee East Midlands has approved the study protocol (REC  
22  
23 98 number: 16/LO/1747). IRAS 198921. Findings will be presented at academic conferences and published in  
24  
25 99 peer-reviewed scientific journals. Dissemination will be facilitated via a partnership with the East  
26  
27 100 Midlands Academic Health Sciences Network and via interaction with all UK funded MRC/EPSRC  
28  
29 101 molecular pathology nodes.

30  
31  
32 102  
33  
34  
35 103 **Key words:** Breathlessness; Breath analysis; Volatile Organic Compound, Observational study  
36  
37  
38 104  
39  
40  
41 105  
42  
43  
44 106  
45  
46  
47 107  
48  
49  
50 108  
51  
52  
53 109  
54  
55  
56  
57  
58  
59  
60

1  
2  
3 1104  
5  
6 1117  
8  
9 11210  
11  
12 11313  
14  
15 11416  
17  
18 **Strengths and Limitations of this Study**19  
20 116 • A pragmatic real world, prospective, observational study across three admission units that21  
22 117 focuses on the systematic discovery and replication of VOC in acutely breathless patients23  
24 118 using both online and offline technologies25  
26 119 • The proposed study is the largest of its kind in acute disease to characterise VOC with a27  
28 120 range of additional assessments that will build a comprehensive phenotype of acute cardio-29  
30 121 respiratory exacerbations31  
32 122 • The proposed study will build an infrastructure for research and subsequent evaluation of33  
34 123 VOC in interventional trials within acute cardio-respiratory exacerbations35  
36 124 • Prior acute treatment exposure will need to be accounted for when evaluating potential37  
38 125 discriminative biomarkers39  
40 126 • VOC technologies are not currently suited for deployment in patients that are of high clinical41  
42 127 acuity43  
44 128 •45  
46  
47  
48 **1. Introduction:**49  
50 130 Breathlessness is a common symptom of cardio-respiratory illnesses that has a significant direct impact51  
52 131 on patients' wellbeing as well as a substantial economic burden on healthcare systems [1]. Although its53  
54 132 etiologies can be variable, exacerbations of common complex chronic cardio-respiratory conditions

1  
2  
3 133 account for approximately 70% of acute presentations with breathlessness, namely exacerbations of  
4  
5 134 asthma and COPD, acute heart failure and community acquired pneumonia [2]. Moreover, moderate and  
6  
7 135 severe breathlessness is significantly associated with all-cause, cardiovascular and COPD mortality[3]. As  
8  
9 136 a consequence symptomatic breathlessness warrants rapid evaluation and targeted diagnostics at  
10  
11 137 presentation.  
12

13  
14 138  
15  
16 139 Diagnostic evaluation of acute breathlessness is heavily reliant on blood based biomarkers e.g. CRP,  
17  
18 140 BNP, Troponin and on occasions blood eosinophil levels. These biomarkers have clinical utility primarily  
19  
20 141 in patients with single pathologies, but have poor discriminatory power in patients with multifactorial  
21  
22 142 presentations of acute breathlessness[4]. There is therefore an unmet need for the development of  
23  
24 143 sensitive and specific biomarkers that differentiate acute breathlessness from its recovery and the  
25  
26 144 common cardio-respiratory conditions that present with acute breathlessness.  
27

28  
29 145  
30  
31 146 CRP plays an important role in diagnosing breathlessness caused by an underlying bacterial  
32  
33 147 pneumonia[5], as well as predicting mortality in patients with COPD [6]. BNP is routinely utilised in  
34  
35 148 acute settings to support the diagnosis of acute heart failure [7]. The European Society of Cardiology  
36  
37 149 (ESC) recommends BNP threshold values of <100 pg/mL to rule out acute congestive cardiac failure and  
38  
39 150 values > 500 pg/ml as diagnostic of acute exacerbations of heart failure [8].  
40

41 151  
42  
43 152 The role of peripheral blood eosinophil count in airway inflammation was poorly understood up until the  
44  
45 153 second half of the 19<sup>th</sup> century when Paul Ehrlich, a German physician and Nobel prize winner,  
46  
47 154 introduced eosin in his technique for white cell differentiation in 1879[9]. Considerable advances in the  
48  
49 155 field of airway inflammation and the role of eosinophils have taken place since [10-12]. More recently  
50  
51 156 Bafadhel *et al* suggested that peripheral blood eosinophil count can be used to direct corticosteroid  
52  
53 157 therapy during COPD exacerbations in single centre study [13].  
54  
55  
56  
57  
58  
59  
60

1  
2  
3 158 Currently, blood biomarkers together with clinical, physiological and imaging parameters are used in  
4  
5 159 diagnosing the cause of acute breathlessness. Blood biomarkers may be less specific as they originate far  
6  
7 160 from the target organs of interest (the heart and the lungs in cardio-respiratory disease). Sputum, although  
8  
9 161 potentially a more definitive lung specific matrix, is comparatively difficult to obtain particularly in  
10  
11 162 acutely unwell patients, limiting its use in acute disease and highlighting the need for better biomarkers.  
12  
13 163 Ideally these biomarkers would have the following characteristics, (i) they would originate from the target  
14  
15 164 organ of interest, (ii) they would significantly add value to conventional risk scoring and diagnostic  
16  
17 165 algorithms in acute breathlessness, (iii) they would be minimally invasive and suitable for rapid point of  
18  
19 166 care diagnosis in emergency rooms and acute admissions units (iv) they would have diagnostic value in  
20  
21 167 patients with multifactorial acute breathlessness.  
22  
23  
24 168

25  
26 169 Exhaled breath contains thousands of volatile organic compounds (VOC) that reflect biological processes  
27  
28 170 occurring in the host both locally in the airways and systematically offering the potential to develop more  
29  
30 171 effective biomarkers in acutely breathless patients (**Figure 1**).  
31  
32  
33 172

34  
35 173 The proposed program of research will use a combination of offline and online technologies to identify  
36  
37 174 and evaluate the diagnostic and prognostic value of VOC in patients with acute cardio-respiratory related  
38  
39 175 breathlessness (**Figure 2**).  
40  
41 176

42  
43 177 Exhaled breath analysis of volatile chemicals offers the potential to develop more effective biomarkers in  
44  
45 178 acutely breathless patients. The use of breath analysis for disease diagnostics dates back to ancient Greeks  
46  
47 179 where physicians used exhaled breath to diagnose different diseases. Breath odours allow correct  
48  
49 180 associations to certain diseases. For example, the sweet smell of diabetic ketoacidosis, the fishy smell of  
50  
51 181 breath associated to liver illness, the urine-like odour of kidney disease and the smell of the breath of  
52  
53 182 patients with lung abscesses, caused by the proliferation of anaerobic bacteria [14-17].  
54  
55  
56  
57  
58  
59  
60

1  
2  
3 183 More recently, exhaled breath analysis has demonstrated early proof of concept in the diagnosis of acute  
4  
5 184 heart failure, and ventilator associated pneumonia[18] . The validity of breath analysis has also been  
6  
7 185 demonstrated in breathless children[19]. This population is likely to prefer breath-based tests, as these are  
8  
9 186 minimally invasive. Importantly, a variety of point of care sensors are now available to evaluate potential  
10  
11 187 exhaled breath biomarkers in emergency care settings.  
12

13  
14 188

15  
16 189 A study by Van Berkel et al demonstrated the ability to distinguish COPD subjects from controls solely  
17  
18 190 based on the presence of VOCs in breath, suggesting that analysis of VOC might be highly relevant for  
19  
20 191 diagnosis of COPD [20]. This established the basis of further studies of VOC in COPD [21-  
21  
22 192 25].recommending larger studies for validation.  
23

24 193 Several other studies found that VOC profiling in diagnosing asthma is potentially feasible [26-32]. This  
25  
26 194 however has been done in relatively small numbers in stable disease.  
27

28 195 Despite the novelty of non-invasive sampling technology and the growing interest in exhaled breath  
29  
30 196 analysis there remains a disappointing level of comparability across studies due to the lack of  
31  
32 197 standardisation and appropriate data analysis methods. A recent systemic review by Anders Christiansen  
33  
34 198 *et al* compared eleven publications reporting very heterogeneous designs, methods, patient group sizes,  
35  
36 199 data analytics and, consequently, quite varying results [33].  
37  
38

39 200

40  
41 201 To our knowledge, no other large studies exploring the use of breath biomarkers in profiling acute  
42  
43 202 breathlessness have been completed. Several studies have explored the use of electronic nose (eNose) in  
44  
45 203 stable disease with good discriminatory power in COPD [34], Pneumonia [35] and heart failure[36] with  
46  
47 204 relatively small sample size. While eNose has now been widely used in detecting various VOC patterns,  
48  
49 205 GC-MS, a largely validated methodology, remains the gold standard technique for detecting VOCs in  
50  
51 206 exhaled breath. The focus of the current research study will be to evaluate acutely breathless cardio-  
52  
53 207 respiratory patients using a combination of ‘discovery’ and near-patient care breath sampling  
54  
55 208 technologies.  
56  
57  
58  
59  
60

1  
2  
3 209 Medical Research Council (MRC) and Engineering and Physical Sciences Research Council (EPSRC)  
4  
5 210 have commissioned a series of molecular pathology nodes aimed at developing molecular signatures  
6  
7 211 relevant to disease diagnosis and progression. This was triggered by the clear need for alliance between  
8  
9 212 academic institutions, industry and NHS partners to enhance the benefits of stratified medicine for  
10  
11 213 patients[37, 38].

13 214 University of Leicester and Loughborough University were awarded a joint molecular pathology node  
14  
15 215 East Midlands Breathomics Pathology Node (EMBER) which this study forms a key part of.  
16  
17  
18 216

## 20 217 **2. Methods and Analysis**

### 22 218 **2.1. Study design**

23  
24  
25 219 A prospective real world observational study across three acute admissions units within Leicestershire  
26  
27 220 (two adult admissions units and one children's assessment unit). The acute units routinely assess and treat  
28  
29 221 cardio-respiratory admissions due to breathlessness in adults and children.

30  
31 222 Participants with self-reported acute breathlessness, either requiring admission or a change in baseline  
32  
33 223 treatment, will be screened for the study. Informed consent will be obtained in all participants following a  
34  
35 224 clinical review by a senior decision maker within 24 hours of acute admission (**Figure 3**).  
36  
37  
38 225  
39  
40 226

### 41 227 **2.2. Objectives**

#### 42 228 **2.2.1. Primary objective**

- 43  
44  
45 229  
46 230
  - To evaluate the sensitivity, specificity, positive and negative predictive value of exhaled breath

47  
48 231 VOC biomarkers to differentiate acute breathlessness in cardio-respiratory patients.

#### 49 50 232 **2.2.2. Secondary objectives:**

- 51 233  
52 234
  - To replicate selected breath VOC biomarkers identified in acute breathlessness.

53  
54  
55  
56  
57  
58  
59  
60

- 1  
2  
3 235 • To discover and replicate breath VOC biomarkers that differentiate the common cardio- respiratory  
4  
5 236 conditions that cause acute breathlessness, specifically (i) acute heart failure, (ii) community  
6  
7 237 acquired pneumonia, (iii) adult exacerbations of asthma and COPD and age-matched adults that do  
8  
9 238 not have cardio-respiratory disease or breathlessness.  
10  
11 239 • To quantify the level of clinical uncertainty in the primary diagnosis using a 100 mm visual  
12  
13 240 analogue scale and independent clinical adjudication of case notes blinded to the following blood  
14  
15 241 biomarkers (i) CRP (ii) BNP (iii) Troponin-I (iv) blood eosinophils, but not clinical history and  
16  
17 242 acute presentation nor chest x-ray imaging. Potential discriminatory breath VOC biomarkers will  
18  
19 243 be adjusted for clinical uncertainty in statistical models.  
20  
21 244 • To identify and replicate exhaled breath VOC biomarkers in school age children treated in hospital  
22  
23 245 for severe asthma attacks and compare these to age-matched healthy controls.  
24  
25

26 246 **2.2.3. Exploratory end points (where applicable):**  
27 247

- 28  
29 248 • To evaluate the dynamic profile of selected breath VOC between the acute state and the recovery  
30  
31 249 state post exacerbation.  
32  
33 250 • To evaluate the relationship between exhaled VOC biomarkers and clinical outcomes including  
34  
35 251 (i) hospital readmission at 30 and 60 days post event (ii) all-cause mortality over a 2 year period  
36  
37 252 post admission.  
38  
39 253 • To evaluate the relationship between breath VOC biomarkers and functional measures  
40  
41 254 e.g. physical performance and activity  
42  
43 255 • To explore potential breath VOC biomarkers of multifactorial acute breathlessness  
44  
45 256 • To evaluate the relationship between diet, lifestyle and environment upon breath VOC  
46  
47 257 biomarkers  
48  
49  
50

51 258  
52  
53 259 **2.3. Sample size estimation**  
54  
55 260  
56  
57  
58  
59  
60



1  
2  
3 261 Preliminary data was utilised to conduct sample size estimates from a cohort of acutely breathless patients  
4  
5 262 admitted to acute admissions units over a 6 month period (February 2017 to August 2017). Hundred and  
6  
7 263 twelve adult participants (asthma 46, community acquired pneumonia 26, COPD 22) and eighteen healthy  
8  
9 264 controls were utilised for the analysis.

11  
12 265 A panel of ten pre-specified aldehydes, based on literature search [31, 39, 40], were extracted from breath  
13  
14 266 using gas chromatography-mass spectrometry (GC-MS). The aldehydes were normalised to a common  
15  
16 267 internal standard and were not background-subtracted.

18  
19 268 A closed formula from Hsieh *et al*[41], relating sample size to observable effect size, was used to  
20  
21 269 calculate sample size from logistic regression models of the ten aldehydes with acute breathlessness as the  
22  
23 270 outcome measure. The sample size estimates are also relevant to acute class comparisons vs. the sum of  
24  
25 271 other acute classes.

27  
28 272 Based upon the sample size estimates we would have an 80% power, with a type 1 error rate of 5%, to  
29  
30 273 detect an odds ratio of association of 1.2 between two disease classes with 55 patients per class. Given the  
31  
32 274 fact that study seeks to discover and replicate breath VOC amongst five adult disease classes (community  
33  
34 275 acquired pneumonia, heart failure, COPD, asthma and healthy aged matched subjects) we would require  
35  
36 276 110 adult patients per class – 550 patients across the program to achieve these aims.

38  
39 277 The closed formulae by Tihaki *et al*,[42] were also utilised to understand the discriminatory power that  
40  
41 278 the samples sizes above would provide with respect to biomarker sensitivity and specificity; The  
42  
43 279 following assumptions were made:

- 44  
45  
46 280 • That a sensitivity of 80 % with a precision of 5% would provide a useful biomarker capable of  
47  
48 281 ‘ruling out’ an acute class. The same target was applied to specificity.  
49  
50  
51 282 • We assume a prevalence of acute breathlessness of 80% as the recruitment campaign uses acute  
52  
53 283 breathlessness as the initial stratification tool for recruitment and 1:5 patients recruited will be  
54  
55 284 non-breathless healthy controls

285 • We aim to balance group sizes across classes equally

286 For a type 1 error rate of 0.05 and a 95% confidence interval

287  $N_{\text{sensitivity}} = 307$

288  $N_{\text{specificity}} = 1,230$

289

290 For a type 1 error rate of 0.05 and a 90% confidence interval

291  $N_{\text{sensitivity}} = 218$

292  $N_{\text{specificity}} = 871$

293

294 For a type 1 error rate of 0.05 and an 85% confidence interval

295  $N_{\text{sensitivity}} = 166$

296  $N_{\text{specificity}} = 664$

297

298 For a type 1 error rate of 0.05 and an 80% confidence interval

299  $N_{\text{sensitivity}} = 131$

300  $N_{\text{specificity}} = 524$

301

302 Therefore, we are powered to identify sensitive biomarkers ( $\geq 80\%$ ) of acute breathlessness with a  
303 maximum marginal error in the estimate for sensitivity not exceeding 5% with 95% confidence. Similarly,  
304 we are powered to identify specific biomarkers ( $\geq 80\%$ ) of acute breathlessness with a maximum  
305 marginal error in the estimate for specificity not exceeding 5% with 80% confidence.

306 For the primary analysis the outcome will be treated as a nominal variable with levels (i) acute heart failure  
307 (ii) community acquired pneumonia (iii) adult exacerbations of asthma and COPD and (iv) acute  
308 exacerbations in school age children treated in hospital for severe asthma attacks.

309 The relationship between the primary outcome and the exhaled breath VOC biomarkers will be modelled  
310 using multinomial logistic regression. In addition to metabolomics markers the following independent  
311 variables will be included in the model: clinical uncertainty score on a 100 mm VAS scale, age, and a

1  
2  
3 312 validated co morbidity score (the Charlson comorbidity score)[43, 44].  
4

5 313

6  
7 314 Receiver operator analyses will be utilised to generate ROC curves for individual and multiple panels VOC  
8  
9 315 predictors in the primary analysis.  
10

11 316

12  
13  
14 317 To understand the dynamic profile of breath biomarkers during (i) the acute state and (ii) in the chronic  
15  
16 318 state up to 6 months post exacerbation, a repeated measures model with a random intercept and random  
17  
18 319 effect for time will be fitted, the random effects will be fitted for each patient. For the repeated measures  
19  
20 320 mixed model an unstructured covariance will be assumed. To evaluate the relationship between breath  
21  
22 321 biomarkers and hospital readmission at 30 and 60 days Cox proportional hazards and frailty models will  
23  
24 322 be utilised [45]. Analysis of Multivariate Survival Data, [CITE] competing risk models and joint models  
25  
26 323 will be fitted [46]. Relationship between death and breath biomarkers will be evaluated using a logistic  
27  
28 324 regression model. Changes in outcome measures will be measured appropriately for each variable (e.g.  
29  
30 325 paired t-test, Mann-Whitney, repeated measures analysis). Tables of descriptive statistics will be compiled  
31  
32 326 for all key variables  
33  
34  
35

36 327 All analysis will be performed using R 3.5.0 <https://www.r-project.org/>.  
37

38 328

#### 39 329 **2.4. Discovery and Replication studies**

40  
41

42 330 Specific indicator conditions have been selected for targeted recruitment according to their high  
43  
44 331 prevalence and unmet need, their high morbidity and mortality and the need to develop better diagnostic  
45  
46 332 and prognostic algorithms in acute care pathways.  
47

48  
49 333 The indicator diagnoses of interest are (i) exacerbations of adult asthma and COPD, (ii) community  
50  
51 334 acquired pneumonia (iii) acute heart Failure and (iv) exacerbation in school age children treated in hospital  
52  
53 335 for severe asthma attacks.  
54  
55  
56  
57  
58  
59  
60

1  
2  
3 336 Patient level clinico-pathological and outcome data (spanning the entire acute pathway) will be collected  
4  
5 337 in parallel to breath sampling. In addition, breath samples will be acquired in the stable state post  
6  
7 338 exacerbation (**Figure 3**).  
8

9 339  
10  
11 340 Age matched healthy volunteers will be recruited where possible at separate visits. For the purposes of this  
12  
13 341 study, healthy volunteers will be defined as participants who have no prior history of asthma, COPD, heart  
14  
15 342 failure and have not been admitted to hospital with community acquired pneumonia within 6 weeks of the  
16  
17 343 baseline study visit. For acute admission the study team will approach the spouse, parent or sibling of the  
18  
19 344 index case and seek informed consent for study assessments. All healthy subjects will undergo two  
20  
21 345 assessments separated by a duration of 8-16 weeks to match the acute and recovery time points elapsed in  
22  
23 346 their index case/partner/spouse/sibling/child. Additional healthy volunteers will be identified from local  
24  
25 347 recruitment databases and via advertising  
26  
27  
28  
29

#### 30 349 **2.4.1. Discovery Phase (Project months 1-24):**

31  
32  
33 350 The aim of the discovery phase is to discover putative discriminatory breath VOC, using both offline and  
34  
35 351 online technologies.

36  
37 352 Pre-planned recruitment of acutely breathless patients will be enriched into the following disease strata  
38  
39 353 following senior clinical decision maker assessment and within 24 hours of acute admission.

40  
41 354 Acute adult heart failure (n=55), adult community acquired pneumonia (n=55), adult exacerbations of  
42  
43 355 asthma (n=55) and COPD (n=55), acute severe asthma attacks in school age children (n=50).

44  
45 356 Additional age matched healthy volunteers (n=55 adults and 50 children) will be identified as a non-  
46  
47 357 disease reference group (**Table 1**).  
48

49 358

50 359

#### 51 360 **2.4.2. Replication Phase (years 3-4)**

361 The aim of the replication phase is to replicate putative discriminatory breath VOC /VOC signatures  
 362 identified in the discovery phase.

363 Similar to the discovery phase, recruitment of acutely breathless patients will be enriched into the  
 364 following disease strata following senior clinical decision maker assessment and within 24 hours of acute  
 365 admission.

366 Acute adult heart failure (n=55), adult community acquired pneumonia (n=55), adult exacerbations of  
 367 asthma (n=55) and COPD (n=55), acute severe asthma attacks in school age children (n=25) (**Table 1**).

368 Additional age matched healthy volunteers (n=55 adults and 25 children) will be identified as a non-  
 369 disease reference group.

370 **Total combined sample size of the discovery and replication phases = 700 participants**

| <b>Disease Category</b>        | <b>Discovery</b> | <b>Replication</b> |
|--------------------------------|------------------|--------------------|
| Acute Adult Asthma             | <b>55</b>        | <b>55</b>          |
| Acute COPD                     | <b>55</b>        | <b>55</b>          |
| Acute Heart Failure            | <b>55</b>        | <b>55</b>          |
| Community Acquired Pneumonia   | <b>55</b>        | <b>55</b>          |
| Adult healthy volunteers       | <b>55</b>        | <b>55</b>          |
| Acute paediatrics Asthma       | <b>50</b>        | <b>25</b>          |
| Paediatrics healthy volunteers | <b>50</b>        | <b>25</b>          |
| <b>Total sample</b>            | <b>375</b>       | <b>325</b>         |

371 **Table (1): Table summarising recruitment targets for both adult and paediatric groups.**

## 372 **2.5. Schedule of assessments**

373 A schedule of acute assessments is outlined below and aligns to the movement of acute patients through  
 374 the clinical care pathway and the overall aim of developing a complete phenotypic picture of acutely  
 375 breathless patients.

### 377 **2.5.1. Defining acute breathlessness**

378 At presentation (within 24 hours of admission) to one of three acute admissions units potentially eligible  
 379 patients will be identified following confirmation of acute breathlessness, identified as (i) patient defined  
 380 acute breathlessness and/or (ii) 1 unit increase above patient reported baseline in the extended medical

381 research council (eMRC) dyspnoea score [47, 48] and at least one of the indicator diagnoses identified as  
 382 the primary clinical diagnosis by a senior clinical decision maker.

### 383 **2.5.2 Informed consent**

384 Patients meeting the pre-specified definition of acute breathlessness will be approached for informed  
 385 consent in to the breath VOC biomarker study. Only patients that are eligible to give full written informed  
 386 consent will be recruited.

### 387 **2.5.3 Collection of blood based pathology markers**

388 Collection of the blood biomarkers CRP, BNP, Troponin-I and blood eosinophil count will be performed  
 389 both acutely and following recovery, when not taken as part of clinical care pathway. These are currently  
 390 used in profiling acutely breathless patients in clinical practice (**Table2**).

391

| Test                             | ANALYSER/METHOD                                                                                                        | LOWER LIMIT OF DETECTION | UPPER LIMIT OF DETECTION |
|----------------------------------|------------------------------------------------------------------------------------------------------------------------|--------------------------|--------------------------|
| C-Reactive protein (CRP)         | Siemens Advia Chemistry XPT, PEG enhanced immunoturbidimetric.<br>Siemens Advia 1800, PEG enhanced immunoturbidimetric | 5 mg/L                   | Diluted to result        |
| B-type natriuretic peptide (BNP) | Siemens Advia Centaur XPT, two-site sandwich immunoassay using direct chemiluminescent technology                      | 2.0 pg/mL                | 1445 pg/mL               |
| Troponin-I                       | Abbott Architect i2000SR, three-site sandwich immunoassay using direct chemiluminescent technology (CMIA).             | 5.0 ng/L                 | 50,000 ng/L              |

392 **Table (2):** Type of analyser and methodology used for blood biomarker calculation. The table outlines  
 393 analyser make, methodology, upper and lower limits of detection as per the University Hospitals of  
 394 Leicester NHS Foundation trust laboratory guidelines.

395

### 396 **2.5.4 Breath VOC sampling**

397 Offline breath sampling using GC-MS coupled with a standardised and CE marked breath sampler-  
 398 ReCIVA<sup>®</sup>[49] and comprehensive two-dimensional gas chromatography-mass spectrometry, coupled  
 399 with a standardised and CE marked breath sampler (ReCIVA<sup>®</sup> GCxGC-MS) will be performed. Gas  
 400 chromatography is considered a gold standard technique in detecting volatile organic compounds and as

401 such its sampling will be prioritised. Additionally the following online technologies, proton transfer  
 402 mass spectroscopy (PTR-MS), gas chromatography - ion mobility spectroscopy (GC-IMS) and  
 403 atmospheric pressure chemical ionisation- mass spectrometry (APCI-MS) will be evaluated according to  
 404 the sampling strategy outlined in section 3, **Figure 3 and Table 3.**

|                                                                       | COPD |   | Asthma |   | Pneumonia |   | Heart Failure |   | Healthy |   | Paediatrics |   |
|-----------------------------------------------------------------------|------|---|--------|---|-----------|---|---------------|---|---------|---|-------------|---|
| Time point                                                            | 1    | 2 | 1      | 2 | 1         | 2 | 1             | 2 | 1       | 2 | 1           | 2 |
| Written informed consent                                              | x    |   | x      |   | x         |   | x             |   | x       |   | x           |   |
| <b>Volatile organic compound (VOC) sampling</b>                       |      |   |        |   |           |   |               |   |         |   |             |   |
| ReCIVA- gas chromatography and mass spectrometry (GC-MS)              | x    | x | x      | x | x         | x | x             | x | x       | x | x           | x |
| ReCIVA- comprehensive two-dimensional gas chromatography (GCxGC-MS)   | x    | x | x      | x | x         | x | x             | x | x       | x | x           | x |
| Atmospheric pressure chemical ionisation- mass spectrometry (APCI-MS) | x    | x | x      | x | x         | x | x             | x | x       | x | x           | x |
| Proton transfer reaction mass spectrometry (PTRMS)                    |      | x |        | x |           | x |               | x | x       | x | x           | x |
| Gas chromatography - ion mobility spectrometry (GC-IMS)               | x    |   | x      |   | x         |   | x             |   |         |   | x           | x |
| <b>Pathology blood tests</b>                                          |      |   |        |   |           |   |               |   |         |   |             |   |
| Full blood count (including differential cell count)                  | x    | x | x      | x | x         | x | x             | x | x       | x | x           | x |
| Brain natriuretic peptide (BNP) [pg/mL]                               | x    | x | x      |   | x         |   | x             | x | x       |   |             |   |
| Troponin-I [ng/L]                                                     | x    |   | x      |   | x         |   | x             |   | x       |   |             |   |
| C-Reactive protein (CRP) [mg/L]                                       | x    | x | x      | x | x         | x | x             | x | x       | x | x           | x |
| <b>Lung function tests</b>                                            |      |   |        |   |           |   |               |   |         |   | x           | x |
| Hand held forced oscillation technique (FOT)                          | x    | x | x      | x | x         | x | x             | x | x       | x |             |   |
| Fractional exhaled nitric oxide (FeNO) - Flow rate 50 [ml/s]          |      |   | x      | x |           |   |               |   |         |   | x           | x |
| Spontaneous sputum sample                                             | x    | x | x      | x | x         | x | x             | x | x       | x |             |   |
| Bio-banking (urine, serum, plasma. sputum supernatants & plugs)       | x    | x | x      | x | x         | x | x             | x | x       | x | x           | x |

|                                |   |  |  |  |  |  |   |  |  |  |  |  |
|--------------------------------|---|--|--|--|--|--|---|--|--|--|--|--|
| Transthoracic echocardiography | x |  |  |  |  |  | x |  |  |  |  |  |
|--------------------------------|---|--|--|--|--|--|---|--|--|--|--|--|

405 **Table (3):** Summary of baseline and follow up assessments. The table summarises key assessments  
 406 carried out at different time points during the study. The participants may undertake any combination of  
 407 the investigations listed at any of these time points.

408

409

### 410 **2.5.5. Collection of additional samples for future biomarker campaigns**

411 Collection of additional biomarkers for future biomarker discovery campaigns including (i) a urine  
 412 sample, (ii) blood samples, up to 85mls for DNA, RNA, plasma and serum and peripheral blood cell flow  
 413 cytometry in selected subjects and (iii) spontaneous or induced sputum samples (plugs and supernatants)  
 414 will be carried out (**Table 3**).

415

416 All samples will be collected at time point 1 and at 2 (**Figure 3**). The additional samples will be used for  
 417 future omics analyses, these may include detailed analysis of the metagenome in sputum and proteomics  
 418 applied to urine and serum samples.

419

### 420 **2.5.6. Physiological characterisation**

421 Physiological measures of lung function will be performed in acutely ill participants and at  
 422 recovery including, (i) Hand held forced oscillation technique (FOT): an easily accessible  
 423 measure of lung function. Patients favour this to spirometry as it is effort independent, unlike  
 424 spirometry and requires less than a minute of quiet tidal breathing to obtain triplicate high quality  
 425 measurements [50], (ii) Fractional exhaled nitric oxide (FeNO): A measure of airway  
 426 inflammation in asthmatic patients[51, 52] (iii) Echocardiography: Two dimensional  
 427 transthoracic echocardiography will be performed in heart failure and COPD patients using an iE  
 428 33 system with S5-1 transducer (frequency transmitted 1.7 MHz, received 3.4 MHz; Philips  
 429 Medical Systems, Best, The Netherlands). Standard techniques as per American Society of



1  
2  
3 430 Echocardiography guidelines (ASE)[53] were used to acquire 2D, colour and Doppler images in  
4  
5 431 conventional parasternal long-axis, short-axis and apical 4-, 2- and 3-chamber views. Left  
6  
7 432 ventricular ejection fraction (LVEF) was calculated using the biplane method of discs formula  
8  
9 433 (Simpson's rule) to derive left ventricular volume indices.  
10  
11  
12

13 434 All participants are encouraged to report any testing related discomfort or concerns to the research team to  
14  
15 435 terminate the sampling process.  
16

### 17 436 **2.5.7 Recovery follow up**

- 18 437 • Patient recovery will be defined as:  
19 438 (i) Patient reported recovery from the acute exacerbation spell and back to their  
20 439 baseline extended MRC score or clinician defined recovery from the acute  
21 440 exacerbation spell  
22 441 and  
23 442 (ii) At least 6 weeks post exacerbation event (up to 6 months).  
24 443

25 444 Patients that re admit to hospital between visits 1 and 2, can have additional visit 1 assessments. Visit 2  
26 445 will be taken as recovery following the subsequent admission. If a patient is admitted to hospital after visit  
27 446 2 then they will be eligible to be recruited as a new study participant.  
28 447

29 448 The schedule of assessments at the recovery visit is outlined (**Table 3**).  
30  
31  
32

### 33 449 **2.6. Clinical Adjudication:**

34 450  
35 451 In an effort to reduce data variability and minimise bias, an independent panel consisting of two senior  
36 452 acute clinicians (SS & NG) will review all pertinent clinical and diagnostic source documentation, whilst  
37 453 blinded to admission blood biomarkers and clinical diagnosis.  
38 454

39 455 All acutely breathless adult patients' notes will be sequentially divided for adjudication. The panel will  
40 456 independently determine the primary diagnosis of highest probability from a list of the four potential acute  
41 457 indicator diagnoses in section 2.4 and mark their level of clinical certainty on a 100 mm visual analogue  
42 458 scale (VAS scale). The panel members will be able to review imaging, electrocardiograms (ECGs), and  
43 459 other relevant information but not admission blood based pathology tests.  
44

45 460 In a subset of patients adjudication will be validated by separate panel member to ensure between observer  
46 461 agreement using Bland-Altman analysis and inter-rater agreement of the primary diagnosis using Kohen's  
47  
48  
49  
50  
51  
52  
53

1  
2  
3 462 kappa via repeated evaluation of a subset of cases (see statistical methods section 2.3).  
4  
5 463

## 6 7 464 **2.7. Clinical Informatics:** 8 9 465

10 466 Clinical data collection will be undertaken using a securely-hosted bespoke database system (ADD)  
11  
12 467 developed within the NIHR Leicester Biomedical Research Centre – Respiratory (BRC). The system links  
13  
14 468 acute admission episodes to hospital pathology records; historical respiratory physiology tests; and  
15  
16 469 demographic information. The system provides functionality to validate data entry; manually verify  
17  
18 470 records and highlight incomplete records. A custom VOC ‘module’ has been created to support data  
19  
20 471 collection within the study visits (1 and 2), and standardise diagnoses and medications through the use of  
21  
22 472 clinical ontologies as well as linking hospital records/tests to patient visits.  
23  
24 473

25  
26 474 Non-ADD based clinical data (e.g. hospital admissions, re-admissions and mortality) will be extracted  
27  
28 475 from the hospital data warehouse using identifiable patient identifiers, and subsequently pseudonymised  
29  
30 476 prior to integration.  
31  
32 477

33  
34 478 An informatics pipeline will be created to facilitate the transfer of chemo-metric data from remote  
35  
36 479 computers to the data repository. This will include tools to (i) enforce the correct labelling of data sets  
37  
38 480 (e.g. study number, visit, type/source of sample) prior to automated validated transfer to the repository;  
39  
40 481 (ii) record information about the sample process; (iii) search and extract data sets from the repository for  
41  
42 482 subsequent analysis. Prior to analysis, clinical and chemo-metric data will be integrated using the study  
43  
44 483 number and any potentially identifiable information will be removed.  
45  
46 484

## 47 48 49 50 51 485 **3. Breath profiling** 52 486

53  
54 487 The technologies utilised in the VOC study during discovery and replication phases are:  
55  
56  
57  
58  
59  
60

1  
2  
3 488 Offline technologies

4  
5 489 - ReCIVA+ GC-MS

6  
7 490 - ReCIVA + GC x GC-MS

8  
9 491 -

10  
11 492 Online technologies

12  
13 493 - GC-IMS

14  
15 494 - PTR-MS

16  
17 495 - APCI-MS

18  
19 496

20 497 Offline technologies will underpin the discovery analyses owing to their ability to identify chemical  
21  
22 498 identity and their recognition as the analytical gold standard in exhaled breath VOC analysis [54].

23  
24 499 In contrast online technologies will be utilised for VOC biomarker replication and at the recovery visits  
25  
26 500 owing to their portability and potential for future point of care testing. **(Figure 4)**.

27  
28 501 A brief description of the core VOC platforms is provided below

29  
30  
31 502 A CE marked breath sampling device (ReCIVA®) developed by Owlstone Medical, will be used to  
32  
33 503 sample breath onto two adsorbent Tenax tubes. Participants will be asked to breathe through the ReCIVA  
34  
35 504 face mask for a maximum of 300 seconds, aiming for collection of  $\geq 80\%$  of the target sample volume of  
36  
37 505 1 litre, after which the Tenax tubes will be transferred to the laboratory for analysis. This effectively  
38  
39 506 allows de-coupling of the breath sampling from the breath sensor and analysis platforms in selected  
40  
41 507 patients that are not able to mobilise to a real time breath sampling device. The Owlstone ReCIVA  
42  
43 508 sampler will be utilised in breath collection for offline technologies namely GC-MS and GCxGC-MS.  
44  
45 509 The ReCIVA sampler is capable of entraining oxygen and is therefore suitable for patients with mild  
46  
47 510 respiratory failure requiring low flow rates of oxygen to maintain target oxygen saturations [49].  
48  
49  
50

51 511 **3.1. Gas chromatography and mass spectroscopy (GC-MS):** is a commonly applied methodology used to  
52  
53 512 accurately measure trace gases in complex mixtures such as exhaled air [54]. Pre-concentrating breath  
54  
55 513 volatiles by various means and subsequent analysis constitute a reliable and sensitive method for VOC

1  
2  
3 514 analysis [55]. Despite its high sensitivity, it is however, a time consuming technique and carries a risk of  
4  
5 515 contamination at the pre-concentration step. It is also not suitable for online and multiple measurements  
6  
7 516 limiting its use as a point-of-care testing technology for VOC [56].  
8  
9

10 517 **3.2. Comprehensive two-dimensional gas chromatography-mass spectrometry (GCxGC-MS):** an  
11  
12 518 advanced analytical technique for the analysis of complex organic matrices; its main advantage is the  
13  
14 519 unparalleled separation power it affords over conventional one-dimensional chromatographic techniques  
15  
16 520 [57]. Previous research, albeit sparse, has demonstrated the potential of GCxGC-MS for breath analysis  
17  
18 521 with the number of VOC detected exceeding those detected by conventional GC-MS [58, 59]. GCxGC-  
19  
20 522 MS of breath metabolites has been used for the identification of biomarkers related to glucose metabolism  
21  
22 523 [60, 61], tuberculosis [62] and radiation response [63]. This has generated interest within the breath  
23  
24 524 research community, however, such studies were conducted on a small scale (<50 patients) and involved  
25  
26 525 the use of expensive detectors and modulators. Method development and analysis of the data-rich GCxGC  
27  
28 526 chromatograms, however, can be time-consuming and require specialist knowledge.  
29  
30

31  
32 527 **3.3. Proton-transfer-reaction mass spectrometry (PTRMS):** a real time technique, capable of  
33  
34 528 simultaneously measuring the evolution of multiple gas metabolites from a single breath. It has been used  
35  
36 529 for the identification of potential useful VOC biomarkers for diagnosis of a variety of diseases: including  
37  
38 530 various cancers[64-66], liver disease[67, 68] and respiratory disease[69]. It has several advantages in  
39  
40 531 clinical settings, such as the speed of sampling, the instant result achieved and the lack of need for sample  
41  
42 532 storage or shipping. However, owing to the lack of pre-concentration or chromatographic separation,  
43  
44 533 sensitivity and definitive compound identification can be somewhat limited when compared to GC-MS.  
45  
46  
47 534 Two breath sampling devices will be used. The first device is a Loccioni SOFIA GSI-S; the subject is  
48  
49 535 required to exhale a single breath, five times (three if providing five samples proves too difficult) into a  
50  
51 536 sterile mouthpiece connected to an electrostatic bacterial/viral filter whilst wearing a nose clip (all CE  
52  
53 537 marked). Flow from the mouthpiece passes into a gas sampling interface capnograph (Loccioni GSI-S –  
54  
55 538 CE marked) and real-time user feedback of flow is provided on screen, allowing the regulation of the  
56  
57  
58  
59  
60

1  
2  
3 539 breath sampling rate. The gas sampling interface acts to simultaneously trigger the acquisition of the  
4  
5 540 PTR-ToF-MS data and the exhaled breath travels through the capnograph down a heated sample line into  
6  
7 541 the ion source of the PTR-ToF-MS  
8  
9

10 542 The second breath sampling device is a ReCIVA breath sampler (Owlstone) with one of the adsorbent  
11  
12 543 Tenax tubes replaced with an outlet tube adapted for online sampling. The exhaled breath is transferred to  
13  
14 544 the PTR-ToF-MS via a heated transfer line connected to the outlet tube, continuously drawn at a constant  
15  
16 545 flow rate by the PTR-ToF-MS. The online adaptation of the consumable adsorbent tube does not affect  
17  
18 546 the CE mark of the ReCIVA sampling device.  
19  
20

21 547 Once the breath sample reaches the PTR-ToF-MS, via either breath sampler, the breath mixes with  
22  
23 548 protonated water ( $H_3O^+$ ) inducing proton transfer to the target volatile organic compounds (VOCs)  
24  
25 549 present, resulting in their ionisation. Sample ions are then guided into the time of flight mass  
26  
27 550 spectrometer and mass spectra, showing the abundance and mass of the VOCs present, are collected  
28  
29 551 throughout the exhalation. Following sampling, mouthpieces, filters and nose clips are disposed of and all  
30  
31 552 patient contacted surfaces wiped down with antiseptic cleaning wipes in preparation for the next patient.  
32  
33

34  
35 553  
36  
37 554 **3.4. Gas chromatography- ion mobility spectrometry (GC-IMS) (B&S Analytik):** Allows the detection  
38  
39 555 of volatile organic compounds down to ultra-trace level (ng/L - to pg/L - range). For years, IMS has been  
40  
41 556 used to discover potential discriminatory breath VOC in lung cancer [70, 71], COPD[72, 73] and  
42  
43 557 asthma[73]. Sampling takes place using a Spiroscout spirometer. The patients exhale through a disposable  
44  
45 558 mouth piece connected to a Teflon tube. A piezoelectric pressure sensor is used to monitor the breathing  
46  
47 559 profile, this opens the sampling valve at the appropriate point in the breath profile to collect end-tidal  
48  
49 560 breath in a sample loop of 10 mL volume. After filling this loop, the collected sample air is then  
50  
51 561 transferred to a multicapillary column for a chromatographic separation, which is achieved in 12 min. The  
52  
53  
54  
55  
56  
57  
58  
59  
60

1  
2  
3 562 separated molecules are then transferred into the IMS, ionised and then separated according to their  
4  
5 563 mobility in a weak electric field.  
6  
7 564 The technology's multiple advantages of ultra-sensitivity, portability, online sampling and short analysis  
8  
9 565 time (typical analysis time of 10 minutes) with real time detection, brings a promise to provide immediate  
10  
11 566 and potentially reliable results for point of care breath diagnostics. Another concept with IMS devices is  
12  
13 567 that once the required breath signatures have been discovered using GC-MS, IMS offers the potential to  
14  
15 568 be 'tuned' for selective detection of VOC.

16  
17  
18 569 **3.5. Atmospheric pressure chemical ionisation- mass spectrometry (APCI-MS) semiportable compact**  
19  
20 **version (Advion):** is one of less sensitive but more affordable versions of mass spectrometers released to  
21  
22 570 the commercial market in recent years. The device uses APCI to produce ions. Although the most  
23  
24 571 common use of APCI-MS systems is the detection in liquid chromatography applications, the technique  
25  
26 572 has proven to be a valuable tool for direct measurement of VOC in air[74, 75] food[76, 77] and breath[78,  
27  
28 573 79]. Recently, the technique has shown potential for online, real time profiling of pseudo-metabolites in  
29  
30 574 exhaled breath [80] with sensitivity comparable with other techniques. By combining miniaturised MS  
31  
32 575 technology with APCI techniques, adequate quality of on-site, real time measurements with minimal or  
33  
34 576 no sample preparation requirement can be provided. This is a desirable outcome as it overcomes main  
35  
36 577 limitation of using standard breath analysis method in clinical setting, which is a need for breath sample  
37  
38 578

39  
40 579  
41  
42 580  
43 608 There remains an overall lack of standardisation and rigour across these technologies which hindered  
44  
45 609 previous advancements in breath discovery; something we intend to minimize.

#### 47 610 **4. Chemometric processing and data analysis:**

48  
49  
50 611 GC-MS breath data will be aligned, deconvoluted and the features for each participant will be extracted.  
51  
52 612 The extracted features will be grouped and classified by retention index and mass spectrum. The  
53  
54  
55  
56  
57  
58  
59  
60

1  
2  
3 613 registered and aligned data will be linked to participant meta-data to generate a breath matrix. Data  
4  
5 614 handling and analysis will be performed by a senior statistician.  
6  
7

8 615 The breath matrix is a  $n \times p$  matrix where  $n$  is the number of subjects and  $p$  is the number of VOC. The  
9  
10 616 breath matrix is high dimensional with  $p \gg n$  and many potentially correlated VOC. In view of this, we  
11  
12 617 will employ sparse partial least squares discriminant analysis (sPLS-DA)[81] to investigate which of the  
13  
14 618 VOC can identify breathlessness. We will also investigate which of the VOC can discriminate between  
15  
16 619 the different disease states including acute exacerbations of asthma and COPD and Pneumonia. In  
17  
18 620 addition to the supervised methods, unsupervised methods will be explored, specifically sparse principle  
19  
20 621 component analysis (sPCA)[82].  
21  
22  
23

24 622 Extracted VOC will also be investigated. Relationships between VOC and patient reported acute  
25  
26 623 breathlessness will be analysed using logistic regression model. VOC associated with patient associated  
27  
28 624 acute breathlessness will be incorporated into multinomial logistic regression models in conjunction with  
29  
30 625 CRP, BNP, blood eosinophils and Troponin-I, pathology biomarkers currently in use for diagnosing  
31  
32 626 undifferentiated breathlessness. In addition to the conventional binary and multinomial logistic regression  
33  
34 627 models, regression models [83].  
35  
36  
37

## 38 628 **5. Ethics and dissemination:**

39  
40  
41 629 The study has obtained full ethical approval from the London South East Research ethics Committee, REC  
42  
43 630 reference 16/LO/1747. IRAS project ID 198921. Publications will be prepared according to the MRC-  
44  
45 631 EMBER consortium agreement and the University of Leicester publications policy. All intended  
46  
47 632 publications will be submitted to the EMBER executive board for review and comments within 60 days of  
48  
49 633 journal submission. Authorship will be according to contribution and internationally recognised guidance  
50  
51 634 on journal authorship.  
52  
53

## 54 55 635 **6. Study dates:** 01/2/2017 – 30/10/2020



1  
2  
3 **636 7. Authors' contributions:**  
4

5 637  
6  
7

8 638 S.S, C.E.B, N.Gr, P.Th and P.Mo conceived the study, obtained funding, wrote the study protocol,  
9  
10 639 obtained ethical and MHRA approvals for the study and coordinated the deployment of analytical testing  
11  
12 640 methods for breath analysis. W.I took the lead in writing the manuscript with support from S.S. Planning  
13  
14 641 and recruitment of adult participants was carried out by W.I, S.Jo, B.Pa, A.Aw, R.Ph, G.Fo, A.Yo, R. J. R  
15  
16 642 and C.Wh. Paediatrics study design was conceived by E.Ga and C.Be and participants recruited by T. Mc  
17  
18 643 and C. Fo. Analytical chemistry team formed of M.Wi, R.Co, D.Sa, D.Ru and L.Br expertly handled all  
19  
20 644 the breath samples and planned an analysis structure. M.Ri, a senior statistician, constructed a statistics  
21  
22 645 and data analysis plan in conjunction with SS. Bioinformatics pipeline and electronic CRFs developed by  
23  
24 646 R.Fr and B.Zh. All authors, including R.Pe, H. Bh, B.Ha, A. Si, K. Ry, H. Pa, T. Su, L. L Ng, contributed  
25  
26 647 to the study design and study protocol.  
27  
28  
29

30  
31 **648 8. Protocol version:** Version 4, 1<sup>st</sup> April 2018  
32  
33

34 649  
35

36 **650 9. Public and patient involvement:**  
37

38 651 A series of consultations have taken place with our patient involvement team within the NIHR Biomedical  
39  
40 652 Research Centre (Respiratory Theme) and across the wider BRC PPI group. Representations from the  
41  
42 653 paediatrics team were also present. This group was sent copies of the participant documentation for review and  
43  
44 654 discussion. Various revisions have been made following on from these discussions.  
45  
46  
47

48 **655 10. Funding statement:**  
49

50 656 Research funding was provided by the MRC and EPSRC Stratified Medicine Grant for Molecular  
51  
52 657 Pathology Nodes (Grant No. MR/N005880/1). The research was supported by the National Institute for  
53  
54 658 Health Research (NIHR) Leicester Biomedical Research Centre and NIHR, Leicester Clinical Research  
55  
56  
57  
58  
59  
60



1  
2  
3 659 Facility and the Midlands Asthma and Allergy Research Association (MAARA) to whom we are  
4  
5 660 extremely grateful. The authors would like to acknowledge the invaluable efforts of the research nurses  
6  
7 661 responsible for the in-clinic sample collection as well as the input from the wider EMBER consortium  
8  
9 662 (Members list can be found at: <https://ember.le.ac.uk/web>). The views expressed are those of the  
10  
11 663 author(s) and not necessarily those of the NHS and NIHR or the Department of Health  
12  
13  
14  
15 664

16  
17 665 **11. Competing interests:** SS has performed advisory services for Owlstone Medical.  
18  
19 666  
20  
21 667  
22  
23 668  
24  
25 669  
26  
27 670  
28  
29 671  
30  
31 672  
32  
33 673  
34  
35 674  
36  
37 675  
38  
39 676  
40  
41 677

#### 41 678 **Figure legends:**

42  
43 679 **Figure (1)** Relationship between lung proximity and degree of invasiveness of different lung matrices.  
44  
45 680 The figure plots the level of invasiveness of various lung matrices in relation to their proximity to the  
46  
47 681 lung. Given their pathological relevance, the degree of invasiveness of bronchoalveolar lavage (BAL) and  
48  
49 682 lung biopsy makes them less favourable in diagnosing respiratory diseases.  
50  
51  
52  
53  
54  
55  
56  
57  
58  
59  
60

1  
2  
3 683 **Figure (2)** Multi-instrument use in breath sampling. Figure illustrates the various combinations of offline  
4  
5 684 and online devices used in breath sampling and the relevant pros and cons. Offline and online  
6  
7 685 technologies are used for the discovery and validation phases of the study respectively.  
8  
9

10 686 **Figure (3)** Study flow chart. Figure outlines the patient journey from admission through to discharge and  
11  
12 687 follow up. Participants with self-reported acute breathlessness presenting to University Hospitals of  
13  
14 688 Leicester are recruited within 24 hours following a senior decision maker review. Breath sampling is  
15  
16 689 carried out on the first visit, at recruitment, and the second visit, up to 6 months after discharge. Patients  
17  
18 690 are admitted through the standard operational emergency medical streaming and care pathways at the  
19  
20 691 University Hospitals of Leicester NHS Trust. Early outcomes (hospital readmission) are measured at 30  
21  
22 692 and 60 days and late outcomes (mortality) including respiratory and all-cause mortality are measured at 2  
23  
24 693 years. Assessments carried out at each time point are summarised in **Table 1**.  
25  
26  
27

28 694 **Figure (4)** Multi-instrument use in breath sampling. Operational space of the analytical technologies  
29  
30 695 used in EMBER for the analysis of volatile organic compounds (VOC) in exhaled breath, including  
31  
32 696 proton transfer reaction-mass spectrometry (PTR-MS), atmospheric pressure chemical ionisation-mass  
33  
34 697 spectrometry (CMS), gas chromatography-ion mobility spectrometry (GC-IMS), gas chromatography-  
35  
36 698 mass spectrometry (GC-MS) and two-dimensional gas chromatography-mass spectrometry (GCxGC).  
37  
38 699 Comparing the typical molar mass range detectable; selectivity in detection owing to the type of  
39  
40 700 ionisation involved and the proton affinity of analytes; and the inclusion of a chromatographic separation  
41  
42 701 affecting total time of analysis. The online technologies involving chemical ionisation (PTR-MS, CMS  
43  
44 702 and GC-IMS) can be used in-clinic owing to short analysis times, but only detect lower molar mass  
45  
46 703 molecules with a proton affinity higher than 697 KJ mol<sup>-1</sup>. Offline chromatographic techniques (GC-MS  
47  
48 704 and GCxGC) detect a wider range of compounds independent of proton affinity; however, the techniques  
49  
50 705 have longer analysis times and involve sample transportation and storage.  
51  
52  
53

54 706  
55  
56  
57  
58  
59  
60

1  
2  
3 707  
4  
5 708  
6  
7 709  
8  
9 710  
10  
11 711  
12  
13 712  
14  
15 713  
16  
17 714  
18  
19 715  
20  
21 716  
22  
23 717  
24  
25 718  
26  
27 719  
28  
29 720  
30  
31 721  
32  
33 722  
34  
35 723  
36  
37 724  
38  
39 725  
40  
41 726  
42  
43 727  
44  
45 728  
46  
47  
48  
49  
50  
51 729  
52 730  
53 731  
54 732  
55  
56  
57  
58  
59  
60

For peer review only

## 8. References

1. Stephenson, J.J., et al., *Clinical and economic burden of dyspnea and other COPD symptoms in a managed care setting*. Int J Chron Obstruct Pulmon Dis, 2017. **12**: p. 1947-1959.
2. David Ponka, M.K., *Top differential diagnoses in family medicine Dyspnoea Can Fam Physician*. Canadian Family Physician, 2008.

- 1  
2  
3 733 3. Figarska, S.M., H.M. Boezen, and J.M. Vonk, *Dyspnea severity, changes in dyspnea status and*  
4 734 *mortality in the general population: the Vlagtwedde/Vlaardingen study*. European Journal of  
5 735 Epidemiology, 2012. **27**(11): p. 867-876.
- 6 736 4. Parshall, M.B., et al., *An Official American Thoracic Society Statement: Update on the*  
7 737 *Mechanisms, Assessment, and Management of Dyspnea*. American Journal of Respiratory and  
8 738 Critical Care Medicine, 2012. **185**(4): p. 435-452.
- 9 739 5. Lim, W.S., et al., *BTS guidelines for the management of community acquired pneumonia in*  
10 740 *adults: update 2009*. Thorax, 2009. **64 Suppl 3**: p. iii1-55.
- 11 741 6. Leuzzi, G., et al., *C-reactive protein level predicts mortality in COPD: a systematic review and*  
12 742 *meta-analysis*. Eur Respir Rev, 2017. **26**(143).
- 13 743 7. Moe, G.W., *B-type natriuretic peptide in heart failure*. Curr Opin Cardiol, 2006. **21**(3): p. 208-14.
- 14 744 8. Ponikowski, P., et al., *2016 ESC Guidelines for the diagnosis and treatment of acute and chronic*  
15 745 *heart failure: The Task Force for the diagnosis and treatment of acute and chronic heart failure*  
16 746 *of the European Society of Cardiology (ESC) Developed with the special contribution of the Heart*  
17 747 *Failure Association (HFA) of the ESC*. Eur Heart J, 2016. **37**(27): p. 2129-2200.
- 18 748 9. Alex Sakula, *Charcot leyden crystals and crushmann spirals*. Thorax, 1986.
- 19 749 10. Calhoun, W.J., J. Sedgwick, and W.W. Busse, *The role of eosinophils in the pathophysiology of*  
20 750 *asthma*. Ann N Y Acad Sci, 1991. **629**: p. 62-72.
- 21 751 11. Pavord, I.D., *Eosinophilic phenotypes of airway disease*. Ann Am Thorac Soc, 2013. **10 Suppl**: p.  
22 752 S143-9.
- 23 753 12. Tashkin, D.P. and M.E. Wechsler, *Role of eosinophils in airway inflammation of chronic*  
24 754 *obstructive pulmonary disease*. International Journal of Chronic Obstructive Pulmonary Disease,  
25 755 2018. **13**: p. 335-349.
- 26 756 13. Bafadhel, M., et al., *Blood Eosinophils to Direct Corticosteroid Treatment of Exacerbations of*  
27 757 *Chronic Obstructive Pulmonary Disease: A Randomized Placebo-Controlled Trial*. American  
28 758 Journal of Respiratory and Critical Care Medicine, 2012. **186**(1): p. 48-55.
- 29 759 14. Bedossa, P. and K. Patel, *Biopsy and Noninvasive Methods to Assess Progression of Nonalcoholic*  
30 760 *Fatty Liver Disease*. Gastroenterology, 2016. **150**(8): p. 1811-1822 e4.
- 31 761 15. Fens, N., et al., *Exhaled breath analysis by electronic nose in airways disease. Established issues*  
32 762 *and key questions*. Clin Exp Allergy, 2013. **43**(7): p. 705-15.
- 33 763 16. Probert, C.S., et al., *Volatile organic compounds as diagnostic biomarkers in gastrointestinal and*  
34 764 *liver diseases*. J Gastrointestin Liver Dis, 2009. **18**(3): p. 337-43.
- 35 765 17. Schubert, J.K., et al., *Breath analysis in critically ill patients: potential and limitations*. Expert Rev  
36 766 Mol Diagn, 2004. **4**(5): p. 619-29.
- 37 767 18. Fowler, S.J., et al., *Surveillance for lower airway pathogens in mechanically ventilated patients by*  
38 768 *metabolomic analysis of exhaled breath: a case-control study*. Thorax, 2015. **70**(4): p. 320-5.
- 39 769 19. Florian Gahleitner, C.G.-H., Caroline S Beardsmore, Hitesh C Pandya, CL Paul Thomas,  
40 770 *Metabolomics pilot study to identify VOC of childhood asthma in exhaled breath*. Bioanalysis,  
41 771 2013.
- 42 772 20. Van Berkel, J.J., et al., *A profile of volatile organic compounds in breath discriminates COPD*  
43 773 *patients from controls*. Respir Med, 2010. **104**(4): p. 557-63.
- 44 774 21. Basanta, M., et al., *Exhaled volatile organic compounds for phenotyping chronic obstructive*  
45 775 *pulmonary disease: a cross-sectional study*. Respir Res, 2012. **13**: p. 72.
- 46 776 22. Besa, V., et al., *Exhaled volatile organic compounds discriminate patients with chronic*  
47 777 *obstructive pulmonary disease from healthy subjects*. International Journal of Chronic  
48 778 Obstructive Pulmonary Disease, 2015. **10**: p. 399-406.

- 1  
2  
3 779 23. Hauschild, A.C., J.I. Baumbach, and J. Baumbach, *Integrated statistical learning of metabolic ion*  
4 780 *mobility spectrometry profiles for pulmonary disease identification*. Genet Mol Res, 2012. **11**(3):  
5 781 p. 2733-44.
- 6 782 24. Jareno-Esteban, J.J., et al., *Study of 5 Volatile Organic Compounds in Exhaled Breath in Chronic*  
7 783 *Obstructive Pulmonary Disease*. Archivos De Bronconeumologia, 2017. **53**(5): p. 251-256.
- 8 784 25. Paredi, P., et al., *Exhaled ethane, a marker of lipid peroxidation, is elevated in chronic obstructive*  
9 785 *pulmonary disease*. Am J Respir Crit Care Med, 2000. **162**(2 Pt 1): p. 369-73.
- 10 786 26. Caldeira, M., et al., *Profiling allergic asthma volatile metabolic patterns using a headspace-solid*  
11 787 *phase microextraction/gas chromatography based methodology*. J Chromatogr A, 2011.  
12 788 **1218**(24): p. 3771-80.
- 13 789 27. Caldeira, M., et al., *Allergic asthma exhaled breath metabolome: a challenge for comprehensive*  
14 790 *two-dimensional gas chromatography*. J Chromatogr A, 2012. **1254**: p. 87-97.
- 15 791 28. Dallinga, J.W., et al., *Volatile organic compounds in exhaled breath as a diagnostic tool for*  
16 792 *asthma in children*. Clin Exp Allergy, 2010. **40**(1): p. 68-76.
- 17 793 29. Dragonieri, S., et al., *An electronic nose in the discrimination of patients with asthma and*  
18 794 *controls*. J Allergy Clin Immunol, 2007. **120**(4): p. 856-62.
- 19 795 30. Fens, N., et al., *Exhaled breath profiling enables discrimination of chronic obstructive pulmonary*  
20 796 *disease and asthma*. Am J Respir Crit Care Med, 2009. **180**(11): p. 1076-82.
- 21 797 31. Ibrahim, B., et al., *Non-invasive phenotyping using exhaled volatile organic compounds in*  
22 798 *asthma*. Thorax, 2011. **66**(9): p. 804-9.
- 23 799 32. Montuschi, P., et al., *Diagnostic performance of an electronic nose, fractional exhaled nitric*  
24 800 *oxide, and lung function testing in asthma*. Chest, 2010. **137**(4): p. 790-6.
- 25 801 33. Christiansen, A., et al., *A systematic review of breath analysis and detection of volatile organic*  
26 802 *compounds in COPD*. J Breath Res, 2016. **10**(3): p. 034002.
- 27 803 34. de Vries, R., et al., *Integration of electronic nose technology with spirometry: validation of a new*  
28 804 *approach for exhaled breath analysis*. J Breath Res, 2015. **9**(4): p. 046001.
- 29 805 35. Shafiek, H., et al., *Using the Electronic Nose to Identify Airway Infection during COPD*  
30 806 *Exacerbations*. PLoS One, 2015. **10**(9): p. e0135199.
- 31 807 36. Finamore, P., et al., *Analysis of volatile organic compounds: an innovative approach to heart*  
32 808 *failure characterization in older patients*. J Breath Res, 2018. **12**(2): p. 026007.
- 33 809 37. MRC Molecular Pathology, Review 20 Aug.
- 34 810 38. Medical Research Council, *Molecular Pathology Nodes*. 2014: MRC website.
- 35 811 39. Corradi, M., et al., *Aldehydes in exhaled breath condensate of patients with chronic obstructive*  
36 812 *pulmonary disease*. Am J Respir Crit Care Med, 2003. **167**(10): p. 1380-6.
- 37 813 40. Larstad, M., et al., *Determination of malondialdehyde in breath condensate by high-performance*  
38 814 *liquid chromatography with fluorescence detection*. J Chromatogr B Analyt Technol Biomed Life  
39 815 *Sci*, 2002. **766**(1): p. 107-14.
- 40 816 41. F. Y. Hsieh, D.A.B., Michael D. Larsen,, *A simple method of sample size calculation for linear and*  
41 817 *logistic regression* Statis Med, 1998.
- 42 818 42. Hajian-Tilaki, K., *Sample size estimation in diagnostic test studies of biomedical informatics*. J  
43 819 *Biomed Inform*, 2014. **48**: p. 193-204.
- 44 820 43. Quan, H., et al., *Updating and validating the Charlson comorbidity index and score for risk*  
45 821 *adjustment in hospital discharge abstracts using data from 6 countries*. Am J Epidemiol, 2011.  
46 822 **173**(6): p. 676-82.
- 47 823 44. Roffman, C.E., J. Buchanan, and G.T. Allison, *Charlson Comorbidities Index*. J Physiother, 2016.  
48 824 **62**(3): p. 171.
- 49 825 45. Bjarnason, H. and P. Hougaard, *Fisher information for two gamma frailty bivariate Weibull*  
50 826 *models*. Lifetime Data Anal, 2000. **6**(1): p. 59-71.

- 1  
2  
3 827 46. Lawrence Gould, A., et al., *Joint modeling of survival and longitudinal non-survival data: current methods and issues. Report of the DIA Bayesian joint modeling working group.* Stat Med, 2015.  
4 828  
5 829 **34**(14): p. 2181-95.
- 6 830 47. Steer, J., et al., *Dyspnoea severity and pneumonia as predictors of in-hospital mortality and early readmission in acute exacerbations of COPD.* Thorax, 2012. **67**(2): p. 117-21.  
7 831  
8 832 48. Tsimogianni, A.M., et al., *Predictors of Outcome After Exacerbation of Chronic Obstructive Pulmonary Disease.* Journal of General Internal Medicine, 2009. **24**(9): p. 1043-1048.  
9 833  
10 834 49. Kitchen, S., et al., *LATE-BREAKING ABSTRACT: Breathe free: Open source development of a breath sampler by a consortium of breath researchers.* European Respiratory Journal, 2015.  
11 835  
12 836 **46**(suppl 59).
- 13 837 50. Oostveen, E., et al., *The forced oscillation technique in clinical practice: methodology, recommendations and future developments.* Eur Respir J, 2003. **22**(6): p. 1026-41.  
14 838  
15 839 51. Pendharkar, S. and S. Mehta, *The clinical significance of exhaled nitric oxide in asthma.* Canadian Respiratory Journal : Journal of the Canadian Thoracic Society, 2008. **15**(2): p. 99-106.  
16 840  
17 841 52. Yates, D.H., *Role of exhaled nitric oxide in asthma.* Immunol Cell Biol, 2001. **79**(2): p. 178-90.  
18 842  
19 843 53. Lang, R.M., et al., *Recommendations for chamber quantification: a report from the American Society of Echocardiography's Guidelines and Standards Committee and the Chamber Quantification Writing Group, developed in conjunction with the European Association of Echocardiography, a branch of the European Society of Cardiology.* J Am Soc Echocardiogr, 2005.  
20 844  
21 845 **18**(12): p. 1440-63.  
22 846  
23 847 54. J. Throck Watson, O.D.S., *Introduction to Mass Spectrometry: Instrumentation, Applications, and Strategies for Data Interpretation, 4th Edition.* 2007: Wiley. 862.  
24 848  
25 849 55. Buszewski, B., et al., *Human exhaled air analytics: biomarkers of diseases.* Biomed Chromatogr, 2007. **21**(6): p. 553-66.  
26 850  
27 851 56. Amann, A., et al., *Applications of breath gas analysis in medicine.* International Journal of Mass Spectrometry, 2004. **239**(2-3): p. 227-233.  
28 852  
29 853 57. Almstetter, M.F., P.J. Oefner, and K. Dettmer, *Comprehensive two-dimensional gas chromatography in metabolomics.* Anal Bioanal Chem, 2012. **402**(6): p. 1993-2013.  
30 854  
31 855 58. Das, M.K., et al., *Investigation of Gender-Specific Exhaled Breath Volatome in Humans by GCxGC-TOF-MS.* Analytical Chemistry, 2014. **86**(2): p. 1229-1237.  
32 856  
33 857 59. Phillips, M., et al., *Detection of an extended human volatome with comprehensive two-dimensional gas chromatography time-of-flight mass spectrometry.* PLoS One, 2013. **8**(9): p. e75274.  
34 858  
35 859  
36 860 60. Gruber, B., et al., *Vacuum ultraviolet absorption spectroscopy in combination with comprehensive two-dimensional gas chromatography for the monitoring of volatile organic compounds in breath gas: A feasibility study.* J Chromatogr A, 2016. **1464**: p. 141-6.  
37 861  
38 862 61. Gruber, B., et al., *Breath gas monitoring during a glucose challenge by a combined PTR-QMS/GCxGC-TOFMS approach for the verification of potential volatile biomarkers.* J Breath Res, 2016. **10**(3): p. 036003.  
39 863  
40 864 62. Mellors, T.R., et al., *A new method to evaluate macaque health using exhaled breath: A case study of M. tuberculosis in a BSL-3 setting.* J Appl Physiol (1985), 2017. **122**(3): p. 695-701.  
41 865  
42 866 63. Phillips, M., et al., *Breath biomarkers of whole-body gamma irradiation in the Gottingen minipig.* Health Phys, 2015. **108**(5): p. 538-46.  
43 867  
44 868 64. Bajtarevic, A., et al., *Noninvasive detection of lung cancer by analysis of exhaled breath.* BMC Cancer, 2009. **9**: p. 348.  
45 869  
46 870 65. Lavra, L., et al., *Investigation of VOCs associated with different characteristics of breast cancer cells.* Sci Rep, 2015. **5**: p. 13246.  
47 871  
48 872  
49 873



- 1  
2  
3 874 66. Zhou, W., et al., *Exhaled breath online measurement for cervical cancer patients and healthy*  
4 875 *subjects by proton transfer reaction mass spectrometry*. *Anal Bioanal Chem*, 2017. **409**(23): p.  
5 876 5603-5612.
- 6 877 67. Fernández del Río, R., et al., *Volatile Biomarkers in Breath Associated With Liver Cirrhosis —*  
7 878 *Comparisons of Pre- and Post-liver Transplant Breath Samples*. *EBioMedicine*, 2015. **2**(9): p.  
8 879 1243-1250.
- 9 880 68. O'Hara, M.E., et al., *Limonene in exhaled breath is elevated in hepatic encephalopathy*. *J Breath*  
10 881 *Res*, 2016. **10**(4): p. 046010.
- 11 882 69. Tomasz Ligor, C.A., Anton Amann, Konrad Schwarz, Bogusaw Buszewski, Wojciech ebrowski,,  
12 883 *<Comparison of Proton Transfer Reaction-Mass Spectrometry and Gas Chromatography-Mass*  
13 884 *Spectrometry in Analysis of Breath Samples.pdf>*. *Chem. Anal.*, 2009.
- 14 885 70. Darwiche, K., et al., *Bronchoscopically obtained volatile biomarkers in lung cancer*. *Lung*, 2011.  
15 886 **189**(6): p. 445-52.
- 16 887 71. Handa, H., et al., *Exhaled Breath Analysis for Lung Cancer Detection Using Ion Mobility*  
17 888 *Spectrometry*. *PLoS ONE*, 2014. **9**(12): p. e114555.
- 18 889 72. Bessa, V., et al., *Detection of volatile organic compounds (VOCs) in exhaled breath of patients*  
19 890 *with chronic obstructive pulmonary disease (COPD) by ion mobility spectrometry*. *International*  
20 891 *Journal for Ion Mobility Spectrometry*, 2011. **14**(1): p. 7-13.
- 21 892 73. Schivo, M., et al., *Mobile instrumentation platform to distinguish airway disorders*. *Journal of*  
22 893 *breath research*, 2013. **7**(1): p. 017113-017113.
- 23 894 74. Badjagbo, K., et al., *Direct atmospheric pressure chemical ionization-tandem mass spectrometry*  
24 895 *for the continuous real-time trace analysis of benzene, toluene, ethylbenzene, and xylenes in*  
25 896 *ambient air*. *J Am Soc Mass Spectrom*, 2009. **20**(5): p. 829-36.
- 26 897 75. Healy, R.M., et al., *A multi-year study of VOC emissions at a chemical waste disposal facility*  
27 898 *using mobile APCI-MS and LPCI-MS instruments*. *Environ Pollut*, 2018. **232**: p. 220-228.
- 28 899 76. Linforth, R. and A.J. Taylor, *Persistence of Volatile Compounds in the Breath after Their*  
29 900 *Consumption in Aqueous Solutions*. *Journal of Agricultural and Food Chemistry*, 2000. **48**(11): p.  
30 901 5419-5423.
- 31 902 77. Perez-Hurtado, P., et al., *Direct analysis of volatile organic compounds in foods by headspace*  
32 903 *extraction atmospheric pressure chemical ionisation mass spectrometry*. *Rapid Commun Mass*  
33 904 *Spectrom*, 2017. **31**(22): p. 1947-1956.
- 34 905 78. Berchtold, C., L. Meier, and R. Zenobi, *Evaluation of extractive electrospray ionization and*  
35 906 *atmospheric pressure chemical ionization for the detection of narcotics in breath*. *International*  
36 907 *Journal of Mass Spectrometry*, 2011. **299**(2-3): p. 145-150.
- 37 908 79. Kapishon, V., et al., *Atmospheric pressure chemical ionization mass spectrometry of pyridine and*  
38 909 *isoprene: potential breath exposure and disease biomarkers*. *J Breath Res*, 2013. **7**(2): p. 026005.
- 39 910 80. Heaney, L.M., et al., *Real-time monitoring of exhaled volatiles using atmospheric pressure*  
40 911 *chemical ionization on a compact mass spectrometer*. *Bioanalysis*, 2016. **8**(13): p. 1325-36.
- 41 912 81. Lê Cao, K.-A., S. Boitard, and P. Besse, *Sparse PLS discriminant analysis: biologically relevant*  
42 913 *feature selection and graphical displays for multiclass problems*. *BMC Bioinformatics*, 2011. **12**:  
43 914 p. 253-253.
- 44 915 82. Zou, H., T. Hastie, and R. Tibshirani, *Sparse Principal Component Analysis*. *Journal of*  
45 916 *Computational and Graphical Statistics*, 2006. **15**(2): p. 265-286.
- 46 917 83. Zou H, H.T., *Regularization and Variable Selection via the Elastic Net*. *Journal of the Royal*  
47 918 *Statistical Society*, 2005.
- 48  
49  
50  
51  
52  
53  
54 919  
55  
56  
57  
58  
59  
60

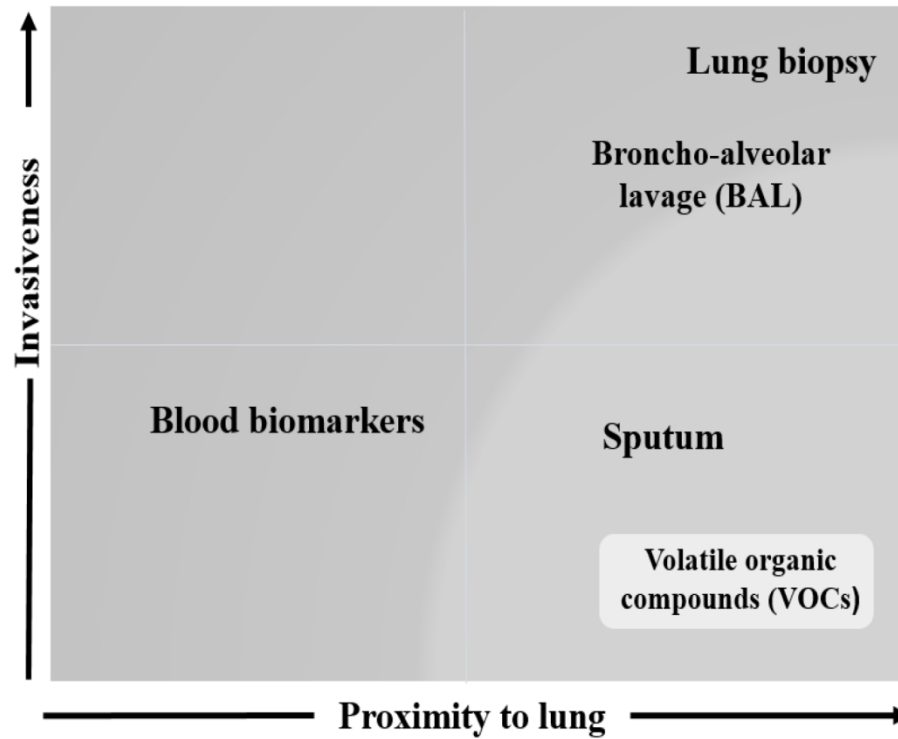

Figure (1): Relationship between lung proximity and degree of invasiveness of different lung matrices. The figure plots the level of invasiveness of various lung matrices in relation to their proximity to the lung. Given their pathological relevance, the degree of invasiveness of bronchoalveolar lavage (BAL) and lung biopsy makes them less favourable in diagnosing respiratory diseases.

144x115mm (300 x 300 DPI)



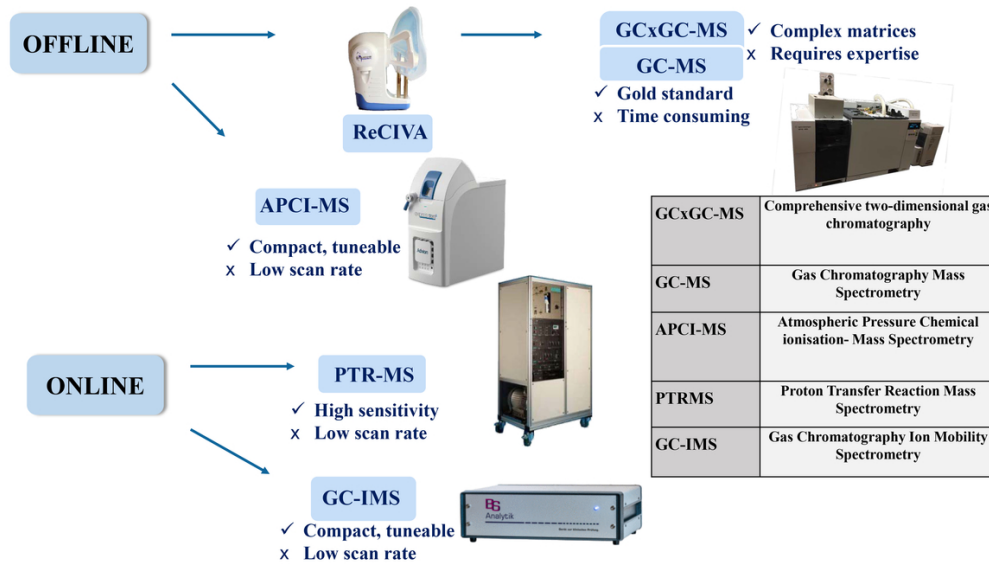

Figure (2): Multi-instrument use in breath sampling. Figure illustrates the various combinations of offline and online devices used in breath sampling and the relevant pros and cons. Offline and online technologies are used for the discovery and validation phases of the study respectively.

97x55mm (300 x 300 DPI)

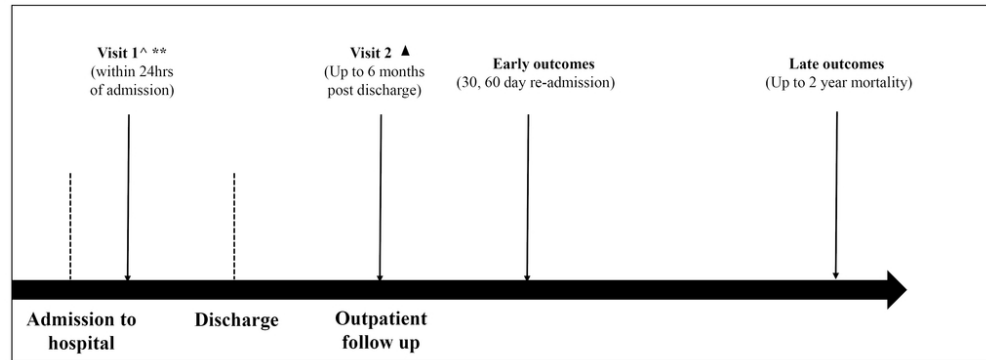

- ^ Following senior decision maker review  
 \*\* Breath sampling (ReCIVA-GC-MS, ReCIVA- GCxGC-MS, GC-IMS, APCI-MS)  
 ▲ Breath sampling (ReCIVA-GC-MS, ReCIVA- GCxGC-MS, PTR-MS, APCI-MS)  
 ---- Following University Hospitals of Leicester streaming and clinical care pathways

Figure (3): Study flow chart. Figure outlines the patient journey from admission through to discharge and follow up. Participants with self-reported acute breathlessness presenting to University Hospitals of Leicester are recruited within 24 hours following a senior decision maker review. Breath sampling is carried out on the first visit, at recruitment, and the second visit, up to 6 months after discharge. Patients are admitted through the standard operational emergency medical streaming and care pathways at the University Hospitals of Leicester NHS Trust. Early outcomes (hospital readmission) are measured at 30 and 60 days and late outcomes (mortality) including respiratory and all-cause mortality are measured at 2 years. Assessments carried out at each time point are summarised in Table 1.

86x43mm (300 x 300 DPI)



Figure (4): Multi-instrument use in breath sampling. Operational space of the analytical technologies used in EMBER for the analysis of volatile organic compounds (VOC) in exhaled breath, including proton transfer reaction-mass spectrometry (PTR-MS), atmospheric pressure chemical ionisation-mass spectrometry (CMS), gas chromatography-ion mobility spectrometry (GC-IMS), gas chromatography-mass spectrometry (GC-MS) and two-dimensional gas chromatography-mass spectrometry (GCxGC). Comparing the typical molar mass range detectable; selectivity in detection owing to the type of ionisation involved and the proton affinity of analytes; and the inclusion of a chromatographic separation affecting total time of analysis. The online technologies involving chemical ionisation (PTR-MS, CMS and GC-IMS) can be used in-clinic owing to short analysis times, but only detect lower molar mass molecules with a proton affinity higher than 697 KJ mol<sup>-1</sup>. Offline chromatographic techniques (GC-MS and GCxGC) detect a wider range of compounds independent of proton affinity; however, the techniques have longer analysis times and involve sample transportation and storage.

88x44mm (300 x 300 DPI)

# BMJ Open

## Assessment of Breath Volatile Organic Compounds in Acute Cardio-respiratory Breathlessness: A protocol describing a Prospective Real World Observational Study

|                               |                                                                                                                                                                                                                                                                                                                                                                                                                                                                                                                                                                                                                                                                                                                                                                                                                                                                                                                                                                                                                                                                                                                                                                                                                                                                                                                                                                                                                                                                                                                                                                                                                                                                                                                                                                                                                                                                                                                                                                                                                                                                                                                                                                                                                                                                                                                                                                                           |
|-------------------------------|-------------------------------------------------------------------------------------------------------------------------------------------------------------------------------------------------------------------------------------------------------------------------------------------------------------------------------------------------------------------------------------------------------------------------------------------------------------------------------------------------------------------------------------------------------------------------------------------------------------------------------------------------------------------------------------------------------------------------------------------------------------------------------------------------------------------------------------------------------------------------------------------------------------------------------------------------------------------------------------------------------------------------------------------------------------------------------------------------------------------------------------------------------------------------------------------------------------------------------------------------------------------------------------------------------------------------------------------------------------------------------------------------------------------------------------------------------------------------------------------------------------------------------------------------------------------------------------------------------------------------------------------------------------------------------------------------------------------------------------------------------------------------------------------------------------------------------------------------------------------------------------------------------------------------------------------------------------------------------------------------------------------------------------------------------------------------------------------------------------------------------------------------------------------------------------------------------------------------------------------------------------------------------------------------------------------------------------------------------------------------------------------|
| Journal:                      | <i>BMJ Open</i>                                                                                                                                                                                                                                                                                                                                                                                                                                                                                                                                                                                                                                                                                                                                                                                                                                                                                                                                                                                                                                                                                                                                                                                                                                                                                                                                                                                                                                                                                                                                                                                                                                                                                                                                                                                                                                                                                                                                                                                                                                                                                                                                                                                                                                                                                                                                                                           |
| Manuscript ID                 | bmjopen-2018-025486.R2                                                                                                                                                                                                                                                                                                                                                                                                                                                                                                                                                                                                                                                                                                                                                                                                                                                                                                                                                                                                                                                                                                                                                                                                                                                                                                                                                                                                                                                                                                                                                                                                                                                                                                                                                                                                                                                                                                                                                                                                                                                                                                                                                                                                                                                                                                                                                                    |
| Article Type:                 | Protocol                                                                                                                                                                                                                                                                                                                                                                                                                                                                                                                                                                                                                                                                                                                                                                                                                                                                                                                                                                                                                                                                                                                                                                                                                                                                                                                                                                                                                                                                                                                                                                                                                                                                                                                                                                                                                                                                                                                                                                                                                                                                                                                                                                                                                                                                                                                                                                                  |
| Date Submitted by the Author: | 23-Nov-2018                                                                                                                                                                                                                                                                                                                                                                                                                                                                                                                                                                                                                                                                                                                                                                                                                                                                                                                                                                                                                                                                                                                                                                                                                                                                                                                                                                                                                                                                                                                                                                                                                                                                                                                                                                                                                                                                                                                                                                                                                                                                                                                                                                                                                                                                                                                                                                               |
| Complete List of Authors:     | <p>Ibrahim, Wadah; Leicester NIHR Biomedical Research Centre (Respiratory theme); College of Life Sciences, Department of Infection, Immunity and Inflammation, University of Leicester</p> <p>Wilde, Michael; University of Leicester, Department of Chemistry</p> <p>Cordell, Rebecca; University of Leicester, Department of Chemistry</p> <p>Salman, Dahlia; Loughborough University, Department of Chemistry</p> <p>Ruszkiewicz, Dorota; Loughborough University, Department of Chemistry</p> <p>Bryant, Luke; University of Leicester, Department of Chemistry</p> <p>Richardson, Matthew; Leicester NIHR Biomedical Research Centre (Respiratory theme); University of Leicester, Infection, Inflammation and Immunity</p> <p>Free, Robert; Leicester NIHR Biomedical Research Centre (Respiratory theme); University of Leicester, Infection, Inflammation and Immunity</p> <p>Zhao, Bo; Leicester NIHR Biomedical Research Centre (Respiratory theme); University of Leicester, Infection, Inflammation and Immunity</p> <p>Yousuf, Ahmed; University of Leicester, Infection, Inflammation and Immunity; Leicester NIHR Biomedical Research Centre (Respiratory theme)</p> <p>White, Christobelle; University of Leicester, Infection, Inflammation and Immunity; Leicester NIHR Biomedical Research Centre (Respiratory theme)</p> <p>Russell, Richard; University of Leicester, Infection, Inflammation and Immunity; Leicester NIHR Biomedical Research Centre (Respiratory theme)</p> <p>Jones, Sheila; University Hospitals of Leicester NHS Trust</p> <p>Patel, Bharti; University Hospitals of Leicester NHS Trust</p> <p>Awal, Asia; University Hospitals of Leicester NHS Trust</p> <p>Phillips, Rachael; NIHR Leicester Clinical Research Facility</p> <p>Fowkes, Graham; NIHR Leicester Clinical Research Facility</p> <p>McNally, Teresa; Paediatric Clinical Investigation Centre</p> <p>Foxon, Clare; Paediatric Clinical Investigation Centre</p> <p>Bhatt, Hetan; Leicester NIHR Biomedical Research Centre (Respiratory theme)</p> <p>Peltrini, Rosa; Leicester NIHR Biomedical Research Centre (Respiratory theme); University of Leicester, Department Infection, Inflammation and Immunity</p> <p>Singapuri, Amisha; Leicester NIHR Biomedical Research Centre (Respiratory theme)</p> <p>Hargadon, Beverley; Leicester NIHR Biomedical Research Centre</p> |

|                                 |                                                                                                                                                                                                                                                                                                                                                                                                                                                                                                                                                                                                                                                                                                                                                                                                                                                                                                                                                                                                                                                                                                                                                                                                                                                                                                                                                                                                                                                                                                                                                                                                                                                                                   |
|---------------------------------|-----------------------------------------------------------------------------------------------------------------------------------------------------------------------------------------------------------------------------------------------------------------------------------------------------------------------------------------------------------------------------------------------------------------------------------------------------------------------------------------------------------------------------------------------------------------------------------------------------------------------------------------------------------------------------------------------------------------------------------------------------------------------------------------------------------------------------------------------------------------------------------------------------------------------------------------------------------------------------------------------------------------------------------------------------------------------------------------------------------------------------------------------------------------------------------------------------------------------------------------------------------------------------------------------------------------------------------------------------------------------------------------------------------------------------------------------------------------------------------------------------------------------------------------------------------------------------------------------------------------------------------------------------------------------------------|
|                                 | (Respiratory theme); University of Leicester, Infection, Inflammation and Immunity<br>Suzuki, T; Department of Cardiovascular Sciences, University of Leicester, , Cardiovascular Research Centre; Leicester NIHR Biomedical Research Centre (Cardiovascular theme)<br>Ng, Leong; Department of Cardiovascular Sciences, University of Leicester, Cardiovascular Research Centre; Leicester NIHR Biomedical Research Centre (Cardiovascular theme)<br>Gaillard, Erol; Leicester NIHR Biomedical Research Centre (Respiratory theme); Paediatric Clinical Investigation Centre<br>Beardsmore, Caroline; Leicester NIHR Biomedical Research Centre (Respiratory theme); Paediatric Clinical Investigation Centre<br>Ryanna, Kimuli; University Hospitals of Leicester NHS Trust<br>Pandya, Hitesh; Discovery Medicine, Respiratory Therapeutic Area, GlaxoSmithKline PLC<br>Coates, Tim; University of Leicester, Infection, Inflammation and Immunity; Department of Cardiovascular Sciences, University of Leicester<br>Monks, Paul; University of Leicester, Infection, Inflammation and Immunity; University of Leicester, Department of Chemistry<br>Greening, Neil; Leicester NIHR Biomedical Research Centre (Respiratory theme); University of Leicester, Infection, Inflammation and Immunity<br>Brightling, Christopher; Leicester NIHR Biomedical Research Centre (Respiratory theme); University of Leicester, Infection, Inflammation and Immunity<br>Thomas, Paul; Loughborough University, Department of Chemistry<br>Siddiqui, Salman; Leicester NIHR Biomedical Research Centre (Respiratory theme); University of Leicester, Infection, Inflammation and Immunity |
| <b>Primary Subject Heading</b>: | Respiratory medicine                                                                                                                                                                                                                                                                                                                                                                                                                                                                                                                                                                                                                                                                                                                                                                                                                                                                                                                                                                                                                                                                                                                                                                                                                                                                                                                                                                                                                                                                                                                                                                                                                                                              |
| Secondary Subject Heading:      | Research methods, Respiratory medicine                                                                                                                                                                                                                                                                                                                                                                                                                                                                                                                                                                                                                                                                                                                                                                                                                                                                                                                                                                                                                                                                                                                                                                                                                                                                                                                                                                                                                                                                                                                                                                                                                                            |
| Keywords:                       | Breathlessness, Observational study, Volatile Organic Compound, Breath analysis                                                                                                                                                                                                                                                                                                                                                                                                                                                                                                                                                                                                                                                                                                                                                                                                                                                                                                                                                                                                                                                                                                                                                                                                                                                                                                                                                                                                                                                                                                                                                                                                   |
|                                 |                                                                                                                                                                                                                                                                                                                                                                                                                                                                                                                                                                                                                                                                                                                                                                                                                                                                                                                                                                                                                                                                                                                                                                                                                                                                                                                                                                                                                                                                                                                                                                                                                                                                                   |

SCHOLARONE™  
Manuscripts

# 1           **Assessment of Breath Volatile Organic Compounds in Acute Cardio-** 2           **respiratory Breathlessness: A protocol describing a Prospective Real** 3           **World Observational Study**

4  
 5           Wadah Ibrahim<sup>1,2</sup>, Michael Wilde<sup>3</sup>, Rebecca Cordell<sup>3</sup>, Dahlia Salman<sup>4</sup>, Dorota Ruszkiewicz<sup>4</sup>, Luke  
 6           Bryant<sup>3</sup>, Matthew Richardson<sup>1,2</sup>, Robert C. Free<sup>1,2</sup>, Bo Zhao<sup>1,2</sup>, Ahmed Yousuf<sup>1,2</sup>, Christobelle  
 7           White<sup>1,2</sup>, Richard J Russell<sup>1,2</sup>, Sheila Jones<sup>5</sup>, Bharti Patel<sup>5</sup>, Asia Awal<sup>5</sup>, Rachael Phillips<sup>6</sup>, Graham  
 8           Fowkes<sup>6</sup>, Teresa McNally<sup>7</sup>, Clare Foxon<sup>7</sup>, Hetan Bhatt<sup>1,2</sup>, Rosa Peltrini<sup>1,2</sup>, Amisha Singapuri<sup>1,2</sup>,  
 9           Beverley Hargadon<sup>1,2</sup>, Toru Suzuki<sup>8,9</sup>, Leong L. Ng<sup>8,9</sup>, Erol A Gaillard<sup>2,7</sup>, Caroline Beardsmore<sup>2,7</sup>,  
 10          Kimuli Ryanna<sup>5</sup>, Hitesh Pandya<sup>11</sup>, Tim Coates<sup>2,10</sup>, Paul S. Monks<sup>2,3</sup>, Neil Greening<sup>1,2</sup>, Chris E  
 11          Brightling<sup>1,2</sup>, Paul Thomas<sup>4</sup>, Salman Siddiqui<sup>1,2</sup>

12  
 13  
 14          wadah.ibrahim@leicester.ac.uk; mjw77@leicester.ac.uk; rc145@leicester.ac.uk; d.salman@lboro.ac.uk;  
 15          d.m.ruszkiewicz2@lboro.ac.uk; lb368@leicester.ac.uk; mr251@leicester.ac.uk; rcf8@leicester.ac.uk;  
 16          bo.zhao@leicester.ac.uk; ajy7@leicester.ac.uk; cmjw3@leicester.ac.uk; rjr22@leicester.ac.uk;  
 17          rjr22@leicester.ac.uk; sheila.jones@uhl-tr.nhs.uk; bharti.m.patel@uhl-tr.nhs.uk; asia.awal@uhl-tr.nhs.uk;  
 18          rachael.phillips@uhl-tr.nhs.uk; graham.fowkes@uhl-tr.nhs.uk; tm23@leicester.ac.uk; clare.foxon@uhl-  
 19          tr.nhs.uk; hetan.bhatt@uhl-tr.nhs.uk; rp417@leicester.ac.uk; amisha.singapuri@uhl-tr.nhs.uk;  
 20          beverley.hargadon@uhl-tr.nhs.uk; ts263@le.ac.uk; lln1@le.ac.uk; eag15@leicester.ac.uk; csb@leicester.ac.uk;  
 21          kimuli.ryanna@uhl-tr.nhs.uk; hitesh.x.pandya@gsk.com; tim.coates@leicester.ac.uk;  
 22          paul.monks@leicester.ac.uk; neil.greening@leicester.ac.uk; ceb17@leicester.ac.uk;  
 23          C.L.P.Thomas@lboro.ac.uk; ss338@leicester.ac.uk

24  
 25          Corresponding author: Professor Salman Siddiqui, ss338@leicester.ac.uk

26          NIHR Leicester Biomedical Research Centre (Respiratory Theme)

27          Glenfield Hospital,

28          Groby Road

29          Leicester

30          LE3 9QP

31          t: +44 116 256 3841

32          e: ss338@leicester.ac.uk

## 33 34          **Authors' affiliations:**

35          <sup>1</sup>Leicester NIHR Biomedical Research Centre (Respiratory theme), Glenfield Hospital, Groby Road, Leicester  
 36          LE3 9QP

37          <sup>2</sup> College of Life Sciences, Department of Infection, Immunity and Inflammation, University of Leicester,  
 38          University Road, Leicester LE1 7RH

1  
2  
3  
4  
5  
6  
7  
8  
9  
10  
11  
12  
13  
14  
15  
16  
17  
18  
19  
20  
21  
22  
23  
24  
25  
26  
27  
28  
29  
30  
31  
32  
33  
34  
35  
36  
37  
38  
39  
40  
41  
42  
43  
44  
45  
46  
47  
48  
49  
50  
51  
52  
53  
54  
55  
56  
57  
58  
59  
60

39 <sup>3</sup> Department of Chemistry, University of Leicester, University Road, Leicester, LE1 7RH

40 <sup>4</sup> Department of Chemistry, Loughborough University, Epinal Way, Loughborough, LE11 3TU

41 <sup>5</sup> University Hospitals of Leicester NHS Trust, Glenfield Hospital, Groby Road, Leicester LE3 9QP

42 <sup>6</sup> NIHR Leicester Clinical Research Facility, Research Space, Level 0, Balmoral Building, Leicester Royal  
43 Infirmary, Infirmary Square, Leicester, LE1 5WW

44 <sup>7</sup> Paediatric Clinical Investigation Centre, Leicester Respiratory Biomedical Research Centre, University of  
45 Leicester, Leicester Royal Infirmary, Leicester, LE2 7LX

46 <sup>8</sup> Department of Cardiovascular Sciences, University of Leicester, Cardiovascular Research Centre, Glenfield  
47 General Hospital, Leicester LE3 9QP.

48 <sup>9</sup> Leicester NIHR Biomedical Research Centre (Cardiovascular theme), Glenfield Hospital, Groby Road,  
49 Leicester LE3 9QP

50 <sup>10</sup> Department of Cardiovascular Sciences, University of Leicester, Level G, Jarvis building RMO, Infirmary  
51 Square, Leicester LE1 5WW

52 <sup>11</sup> Discovery Medicine, Respiratory Therapeutic Area, GlaxoSmithKline PLC, Gunnels Wood Road, Stevenage,  
53 Hertfordshire, SG1 2NY

review only

69

**Abstract****Introduction**

Patients presenting with acute undifferentiated breathlessness are commonly encountered in admissions units across the United Kingdom. Existing blood biomarkers have clinical utility in distinguishing patients with single organ pathologies but have poor discriminatory power in multi factorial presentations. Evaluation of volatile organic compounds (VOC) in exhaled breath offers the potential to develop biomarkers of disease states that underpin acute cardio-respiratory breathlessness, owing to their proximity to the cardio-respiratory system. To date there has been no systematic evaluation of VOC in acute cardio-respiratory breathlessness. The proposed study will seek to use both offline and online VOC technologies to evaluate the predictive value of VOC in identifying common conditions that present with acute cardio-respiratory breathlessness.

**Methods and analysis**

A prospective real world observational study carried out across three acute admissions units within Leicestershire. Participants with self-reported acute breathlessness, with a confirmed primary diagnosis of either acute heart failure, community acquired pneumonia and acute exacerbation of asthma or COPD will be recruited within 24 hours of admission. Additionally, school age children admitted with severe asthma will be evaluated. All participants will undergo breath sampling on admission and upon recovery following discharge. A range of online technologies including: proton-transfer-reaction mass spectrometry (PTR-MS), gas chromatography ion mobility spectrometry (GC-IMS), atmospheric pressure chemical ionisation- mass spectrometry (APCI-MS) and offline technologies including gas chromatography mass spectroscopy (GC-MS) and comprehensive two-dimensional gas chromatography-mass spectrometry (GCxGC-MS) will be utilised for VOC discovery and replication. For offline technologies a standardised CE marked breath sampling device (ReCIVA<sup>®</sup>) will be used. All recruited participants will be characterised using existing blood biomarkers including C - reactive protein (CRP), brain derived natriuretic peptide (BNP), Troponin-I



1  
2  
3 95 and blood eosinophil levels and further evaluated using a range of standardised questionnaires, lung  
4  
5 96 function testing, sputum cell counts and other diagnostic tests pertinent to acute disease.  
6  
7

### 8 97 **Ethics and dissemination**

9  
10 98 The National Research Ethics Service Committee East Midlands has approved the study protocol  
11  
12 99 (REC number: 16/LO/1747). IRAS 198921. Findings will be presented at academic conferences and  
13  
14 100 published in peer-reviewed scientific journals. Dissemination will be facilitated via a partnership with  
15  
16 101 the East Midlands Academic Health Sciences Network and via interaction with all UK funded  
17  
18 102 MRC/EPSRC molecular pathology nodes.  
19  
20  
21  
22 103  
23  
24

25 104 **Key words:** Breathlessness; Breath analysis; Volatile Organic Compound, Observational study  
26  
27 105  
28  
29  
30 106  
31  
32  
33 107  
34  
35  
36 108  
37  
38  
39 109  
40  
41  
42  
43 110  
44  
45  
46 111  
47  
48  
49 112  
50  
51  
52 113  
53  
54  
55 114  
56  
57  
58 115  
59  
60

## 116 **Strengths and Limitations of this Study**

- 117 • A pragmatic real world, prospective, observational study across three admission units that  
118 focuses on the systematic discovery and replication of VOC in acutely breathless patients  
119 using both online and offline technologies
- 120 • The proposed study is the largest of its kind in acute disease to characterise VOC with a  
121 range of additional assessments that will build a comprehensive phenotype of acute  
122 cardio-respiratory exacerbations
- 123 • The proposed study will build an infrastructure for research and subsequent evaluation of  
124 VOC in interventional trials within acute cardio-respiratory exacerbations
- 125 • Prior acute treatment exposure will need to be accounted for when evaluating potential  
126 discriminative biomarkers
- 127 • VOC technologies are not currently suited for deployment in patients that are of high  
128 clinical acuity

## 130 **1. Introduction:**

131 Breathlessness is a common symptom of cardio-respiratory illnesses that has a significant direct  
132 impact on patients' wellbeing as well as a substantial economic burden on healthcare systems [1].  
133 Although its etiologies can be variable, exacerbations of common complex chronic cardio-respiratory  
134 conditions account for approximately 70% of acute presentations with breathlessness, namely  
135 exacerbations of asthma and COPD, acute heart failure and community acquired pneumonia [2].  
136 Moreover, moderate and severe breathlessness is significantly associated with all-cause,  
137 cardiovascular and COPD mortality[3]. As a consequence symptomatic breathlessness warrants rapid  
138 evaluation and targeted diagnostics at presentation.

139

140 Diagnostic evaluation of acute breathlessness is heavily reliant on blood based biomarkers e.g. CRP,  
141 BNP, Troponin and on occasions blood eosinophil levels. These biomarkers have clinical utility  
142 primarily in patients with single pathologies, but have poor discriminatory power in patients with

1  
2  
3 143 multifactorial presentations of acute breathlessness[4]. There is therefore an unmet need for the  
4  
5 144 development of sensitive and specific biomarkers that differentiate acute breathlessness from its  
6  
7 145 recovery and the common cardio-respiratory conditions that present with acute breathlessness.  
8  
9 146  
10  
11 147 CRP plays an important role in diagnosing breathlessness caused by an underlying bacterial  
12  
13 148 pneumonia[5], as well as predicting mortality in patients with COPD [6]. BNP is routinely utilised in  
14  
15 149 acute settings to support the diagnosis of acute heart failure [7]. The European Society of Cardiology  
16  
17 150 (ESC) recommends BNP threshold values of <100 pg/mL to rule out acute congestive cardiac failure  
18  
19 151 and values > 500 pg/ml as diagnostic of acute exacerbations of heart failure [8].  
20  
21  
22 152

23  
24 153 The role of peripheral blood eosinophil count in airway inflammation was poorly understood up until  
25  
26 154 the second half of the 19<sup>th</sup> century when Paul Ehrlich, a German physician and Nobel prize winner,  
27  
28 155 introduced eosin in his technique for white cell differentiation in 1879[9]. Considerable advances in  
29  
30 156 the field of airway inflammation and the role of eosinophils have taken place since [10-12]. More  
31  
32 157 recently Bafadhel *et al* suggested that peripheral blood eosinophil count can be used to direct  
33  
34 158 corticosteroid therapy during COPD exacerbations in single centre study [13].

35  
36  
37 159 Currently, blood biomarkers together with clinical, physiological and imaging parameters are used in  
38  
39 160 diagnosing the cause of acute breathlessness. Blood biomarkers may be less specific as they originate  
40  
41 161 far from the target organs of interest (the heart and the lungs in cardio-respiratory disease). Sputum,  
42  
43 162 although potentially a more definitive lung specific matrix, is comparatively difficult to obtain  
44  
45 163 particularly in acutely unwell patients, limiting its use in acute disease and highlighting the need for  
46  
47 164 better biomarkers. Ideally these biomarkers would have the following characteristics, (i) they would  
48  
49 165 originate from the target organ of interest, (ii) they would significantly add value to conventional risk  
50  
51 166 scoring and diagnostic algorithms in acute breathlessness, (iii) they would be minimally invasive and  
52  
53 167 suitable for rapid point of care diagnosis in emergency rooms and acute admissions units (iv) they  
54  
55 168 would have diagnostic value in patients with multifactorial acute breathlessness.  
56  
57  
58 169

1  
2  
3 170 Exhaled breath contains thousands of volatile organic compounds (VOC) that reflect biological  
4  
5 171 processes occurring in the host both locally in the airways and systematically offering the potential to  
6  
7 172 develop more effective biomarkers in acutely breathless patients (**Figure 1**).

8  
9 173  
10  
11 174 The proposed program of research will use a combination of offline and online technologies to  
12  
13 175 identify and evaluate the diagnostic and prognostic value of VOC in patients with acute cardio-  
14  
15 176 respiratory related breathlessness (**Figure 2**).

16  
17 177  
18  
19  
20 178 Exhaled breath analysis of volatile chemicals offers the potential to develop more effective biomarkers  
21  
22 179 in acutely breathless patients. The use of breath analysis for disease diagnostics dates back to ancient  
23  
24 180 Greeks where physicians used exhaled breath to diagnose different diseases. Breath odours allow  
25  
26 181 correct associations to certain diseases. For example, the sweet smell of diabetic ketoacidosis, the  
27  
28 182 fishy smell of breath associated to liver illness, the urine-like odour of kidney disease and the smell of  
29  
30 183 the breath of patients with lung abscesses, caused by the proliferation of anaerobic bacteria [14-17].  
31  
32 184 More recently, exhaled breath analysis has demonstrated early proof of concept in the diagnosis of  
33  
34 185 acute heart failure, and ventilator associated pneumonia[18] . The validity of breath analysis has also  
35  
36 186 been demonstrated in breathless children[19]. This population is likely to prefer breath-based tests, as  
37  
38 187 these are minimally invasive. Importantly, a variety of point of care sensors are now available to  
39  
40 188 evaluate potential exhaled breath biomarkers in emergency care settings.

41  
42  
43 189  
44  
45 190 A study by Van Berkel et al demonstrated the ability to distinguish COPD subjects from controls  
46  
47 191 solely based on the presence of VOCs in breath, suggesting that analysis of VOC might be highly  
48  
49 192 relevant for diagnosis of COPD [20]. This established the basis of further studies of VOC in COPD  
50  
51 193 [21-25].recommending larger studies for validation.

52  
53 194 Several other studies found that VOC profiling in diagnosing asthma is potentially feasible [26-32].

54  
55 195 This however has been done in relatively small numbers in stable disease.

56  
57 196 Despite the novelty of non-invasive sampling technology and the growing interest in exhaled breath  
58  
59 197 analysis there remains a disappointing level of comparability across studies due to the lack of

1  
2  
3 198 standardisation and appropriate data analysis methods. A recent systemic review by Anders  
4  
5 199 Christiansen *et al* compared eleven publications reporting very heterogeneous designs, methods,  
6  
7 200 patient group sizes, data analytics and, consequently, quite varying results [33].  
8

9 201  
10  
11 202 To our knowledge, no other large studies exploring the use of breath biomarkers in profiling acute  
12  
13 203 breathlessness have been completed. Several studies have explored the use of electronic nose (eNose)  
14  
15 204 in stable disease with good discriminatory power in COPD [34], Pneumonia [35] and heart failure[36]  
16  
17 205 with relatively small sample size. While eNose has now been widely used in detecting various VOC  
18  
19 206 patterns, GC-MS, a largely validated methodology, remains the gold standard technique for detecting  
20  
21 207 VOCs in exhaled breath. The focus of the current research study will be to evaluate acutely breathless  
22  
23 208 cardio-respiratory patients using a combination of ‘discovery’ and near-patient care breath sampling  
24  
25 209 technologies.

26  
27  
28 210 Medical Research Council (MRC) and Engineering and Physical Sciences Research Council (EPSRC)  
29  
30 211 have commissioned a series of molecular pathology nodes aimed at developing molecular signatures  
31  
32 212 relevant to disease diagnosis and progression. This was triggered by the clear need for alliance  
33  
34 213 between academic institutions, industry and NHS partners to enhance the benefits of stratified  
35  
36 214 medicine for patients[37, 38].

37  
38  
39 215 University of Leicester and Loughborough University were awarded a joint molecular pathology node  
40  
41 216 East Midlands Breathomics Pathology Node (EMBER) which this study forms a key part of.  
42

43 217

## 44 45 218 **2. Methods and Analysis**

### 46 47 219 **2.1. Study design**

48  
49 220 A prospective real world observational study across three acute admissions units within Leicestershire  
50  
51 221 (two adult admissions units and one children’s assessment unit). The acute units routinely assess and  
52  
53 222 treat cardio-respiratory admissions due to breathlessness in adults and children.  
54  
55  
56  
57  
58  
59  
60

1  
2  
3 223 Participants with self-reported acute breathlessness, either requiring admission or a change in baseline  
4  
5 224 treatment, will be screened for the study. Informed consent will be obtained in all participants  
6  
7 225 following a clinical review by a senior decision maker within 24 hours of acute admission (**Figure 3**).  
8  
9  
10 226  
11  
12 227

## 13 228 **2.2. Objectives**

### 14 229 **2.2.1. Primary objective**

- 15  
16 230  
17 231
- 18 231 • To evaluate the sensitivity, specificity, positive and negative predictive value of exhaled  
19  
20 232 breath VOC biomarkers to differentiate acute breathlessness in cardio-respiratory patients.

### 21 233 **2.2.2. Secondary objectives:**

- 22 234  
23 235
- 24 235 • To replicate selected breath VOC biomarkers identified in acute breathlessness.
  - 25 236 • To discover and replicate breath VOC biomarkers that differentiate the common cardio-  
26  
27 237 respiratory conditions that cause acute breathlessness, specifically (i) acute heart failure, (ii)  
28  
29 238 community acquired pneumonia, (iii) adult exacerbations of asthma and COPD and age-  
30  
31 239 matched adults that do not have cardio-respiratory disease or breathlessness.
  - 32 240 • To quantify the level of clinical uncertainty in the primary diagnosis using a 100 mm visual  
33  
34 241 analogue scale and independent clinical adjudication of case notes blinded to the following  
35  
36 242 blood biomarkers (i) CRP (ii) BNP (iii) Troponin-I (iv) blood eosinophils, but not clinical  
37  
38 243 history and acute presentation nor chest x-ray imaging. Potential discriminatory breath VOC  
39  
40 244 biomarkers will be adjusted for clinical uncertainty in statistical models.
  - 41 245 • To identify and replicate exhaled breath VOC biomarkers in school age children treated in  
42  
43 246 hospital for severe asthma attacks and compare these to age-matched healthy controls.

### 44 247 **2.2.3. Exploratory end points (where applicable):**

- 45 248  
46 249
- 47 249 • To evaluate the dynamic profile of selected breath VOC between the acute state and the  
48  
49 250 recovery state post exacerbation.
- 50  
51  
52  
53  
54  
55  
56  
57  
58  
59  
60

- 1  
2  
3 251 • To evaluate the relationship between exhaled VOC biomarkers and clinical outcomes  
4  
5 252 including (i) hospital readmission at 30 and 60 days post event (ii) all-cause mortality over a 2  
6  
7 253 year period post admission.  
8  
9 254 • To evaluate the relationship between breath VOC biomarkers and functional measures  
10  
11 255 e.g. physical performance and activity  
12  
13 256 • To explore potential breath VOC biomarkers of multifactorial acute breathlessness  
14  
15  
16 257 • To evaluate the relationship between diet, lifestyle and environment upon breath VOC  
17  
18 258 biomarkers  
19  
20 259

### 22 260 **2.3. Sample size estimation**

23  
24 261  
25  
26 262 Preliminary data was utilised to conduct sample size estimates from a cohort of acutely breathless  
27  
28 263 patients admitted to acute admissions units over a 6 month period (February 2017 to August 2017).  
29  
30 264 Hundred and twelve adult participants (asthma 46, community acquired pneumonia 26, COPD 22)  
31  
32 265 and eighteen healthy controls were utilised for the analysis.  
33  
34

35 266 A panel of ten pre-specified aldehydes, based on literature search [31, 39, 40], were extracted from  
36  
37 267 breath using gas chromatography-mass spectrometry (GC-MS). The aldehydes were normalised to a  
38  
39 268 common internal standard and were not background-subtracted.  
40  
41

42 269 A closed formula from Hsieh *et al*[41], relating sample size to observable effect size, was used to  
43  
44 270 calculate sample size from logistic regression models of the ten aldehydes with acute breathlessness  
45  
46 271 as the outcome measure. The sample size estimates are also relevant to acute class comparisons vs.  
47  
48 272 the sum of other acute classes.  
49  
50

51 273 Based upon the sample size estimates we would have an 80% power, with a type 1 error rate of 5%, to  
52  
53 274 detect an odds ratio of association of 1.2 between two disease classes with 55 patients per class. Given  
54  
55 275 the fact that study seeks to discover and replicate breath VOC amongst five adult disease classes  
56  
57 276 (community acquired pneumonia, heart failure, COPD, asthma and healthy aged matched subjects) we  
58  
59 277 would require 110 adult patients per class – 550 patients across the program to achieve these aims.  
60

1  
2  
3 278 The closed formulae by Tihaki *et al*,<sup>[42]</sup> were also utilised to understand the discriminatory power  
4  
5 279 that the samples sizes above would provide with respect to biomarker sensitivity and specificity; The  
6  
7 280 following assumptions were made:

- 10 281 • That a sensitivity of 80 % with a precision of 5% would provide a useful biomarker capable  
11  
12 282 of ‘ruling out’ an acute class. The same target was applied to specificity.
- 14 283 • We assume a prevalence of acute breathlessness of 80% as the recruitment campaign uses  
16 284 acute breathlessness as the initial stratification tool for recruitment and 1:5 patients recruited  
18 285 will be non-breathless healthy controls
- 21 286 • We aim to balance group sizes across classes equally

23 287 For a type 1 error rate of 0.05 and a 95% confidence interval

24  
25 288  $N_{\text{sensitivity}} = 307$

26  
27 289  $N_{\text{specificity}} = 1,230$

28  
29 290

30 291 For a type 1 error rate of 0.05 and a 90% confidence interval

31  
32 292  $N_{\text{sensitivity}} = 218$

33  
34 293  $N_{\text{specificity}} = 871$

35  
36 294

37 295 For a type 1 error rate of 0.05 and an 85% confidence interval

38  
39 296  $N_{\text{sensitivity}} = 166$

40  
41 297  $N_{\text{specificity}} = 664$

42  
43 298

44 299 For a type 1 error rate of 0.05 and an 80% confidence interval

45  
46 300  $N_{\text{sensitivity}} = 131$

47  
48 301  $N_{\text{specificity}} = 524$

49  
50 302

51 303 Therefore, we are powered to identify sensitive biomarkers ( $\geq 80\%$ ) of acute breathlessness with a  
52  
53 304 maximum marginal error in the estimate for sensitivity not exceeding 5% with 95% confidence.

54  
55 305 Similarly, we are powered to identify specific biomarkers ( $\geq 80\%$ ) of acute breathlessness with a  
56  
57 306 maximum marginal error in the estimate for specificity not exceeding 5% with 80% confidence.



1  
2  
3 307 For the primary analysis the outcome will be treated as a nominal variable with levels (i) acute heart  
4  
5 308 failure (ii) community acquired pneumonia (iii) adult exacerbations of asthma and COPD and (iv) acute  
6  
7 309 exacerbations in school age children treated in hospital for severe asthma attacks.  
8  
9

10 310 The relationship between the primary outcome and the exhaled breath VOC biomarkers will be  
11  
12 311 modelled using multinomial logistic regression. In addition to metabolomics markers the following  
13  
14 312 independent variables will be included in the model: clinical uncertainty score on a 100 mm VAS  
15  
16 313 scale, age, and a validated co morbidity score (the Charlson comorbidity score)[43, 44].  
17  
18 314

19  
20 315 Receiver operator analyses will be utilised to generate ROC curves for individual and multiple panels  
21  
22 316 VOC predictors in the primary analysis.  
23  
24 317

25  
26  
27 318 To understand the dynamic profile of breath biomarkers during (i) the acute state and (ii) in the  
28  
29 319 chronic state up to 6 months post exacerbation, a repeated measures model with a random intercept  
30  
31 320 and random effect for time will be fitted, the random effects will be fitted for each patient. For the  
32  
33 321 repeated measures mixed model an unstructured covariance will be assumed. To evaluate the  
34  
35 322 relationship between breath biomarkers and hospital readmission at 30 and 60 days Cox proportional  
36  
37 323 hazards and frailty models will be utilised [45]. Analysis of Multivariate Survival Data, [CITE]  
38  
39 324 competing risk models and joint models will be fitted [46]. Relationship between death and breath  
40  
41 325 biomarkers will be evaluated using a logistic regression model. Changes in outcome measures will be  
42  
43 326 measured appropriately for each variable (e.g. paired t-test, Mann-Whitney, repeated measures  
44  
45 327 analysis). Tables of descriptive statistics will be compiled for all key variables  
46  
47  
48

49 328 All analysis will be performed using R 3.5.0 <https://www.r-project.org/>.

50  
51 329

## 52 330 **2.4. Discovery and Replication studies**

53  
54  
55 331 Specific indicator conditions have been selected for targeted recruitment according to their high  
56  
57 332 prevalence and unmet need, their high morbidity and mortality and the need to develop better  
58  
59 333 diagnostic and prognostic algorithms in acute care pathways.  
60

1  
2  
3 334 The indicator diagnoses of interest are (i) exacerbations of adult asthma and COPD, (ii) community  
4  
5 335 acquired pneumonia (iii) acute heart Failure and (iv) exacerbation in school age children treated in  
6  
7 336 hospital for severe asthma attacks.  
8  
9

10 337 Patient level clinico-pathological and outcome data (spanning the entire acute pathway) will be  
11  
12 338 collected in parallel to breath sampling. In addition, breath samples will be acquired in the stable state  
13  
14 339 post exacerbation (**Figure 3**).  
15

16 340

17  
18 341 Age matched healthy volunteers will be recruited where possible at separate visits. For the purposes of  
19  
20 342 this study, healthy volunteers will be defined as participants who have no prior history of asthma,  
21  
22 343 COPD, heart failure and have not been admitted to hospital with community acquired pneumonia  
23  
24 344 within 6 weeks of the baseline study visit. For acute admission the study team will approach the  
25  
26 345 spouse, parent or sibling of the index case and seek informed consent for study assessments. All  
27  
28 346 healthy subjects will undergo two assessments separated by a duration of 8-16 weeks to match the  
29  
30 347 acute and recovery time points elapsed in their index case/partner/spouse/sibling/child. Additional  
31  
32 348 healthy volunteers will be identified from local recruitment databases and via advertising  
33  
34

35 349

#### 37 350 ***2.4.1. Discovery Phase (Project months 1-24):***

39 351 The aim of the discovery phase is to discover putative discriminatory breath VOC, using both offline  
40  
41 352 and online technologies.  
42

43  
44 353 Pre-planned recruitment of acutely breathless patients will be enriched into the following disease  
45  
46 354 strata following senior clinical decision maker assessment and within 24 hours of acute admission.  
47

48 355 Acute adult heart failure (n=55), adult community acquired pneumonia (n=55), adult exacerbations of  
49  
50 356 asthma (n=55) and COPD (n=55), acute severe asthma attacks in school age children (n=50).  
51

52 357 Additional age matched healthy volunteers (n=55 adults and 50 children) will be identified as a non-  
53  
54 358 disease reference group (**Table 1**).  
55

56 359

58 360  
59  
60

## 2.4.2. Replication Phase (years 3-4)

The aim of the replication phase is to replicate putative discriminatory breath VOC /VOC signatures identified in the discovery phase.

Similar to the discovery phase, recruitment of acutely breathless patients will be enriched into the following disease strata following senior clinical decision maker assessment and within 24 hours of acute admission.

Acute adult heart failure (n=55), adult community acquired pneumonia (n=55), adult exacerbations of asthma (n=55) and COPD (n=55), acute severe asthma attacks in school age children (n=25) (Table 1).

Additional age matched healthy volunteers (n=55 adults and 25 children) will be identified as a non-disease reference group.

**Total combined sample size of the discovery and replication phases = 700 participants**

| Disease Category               | Discovery  | Replication |
|--------------------------------|------------|-------------|
| Acute Adult Asthma             | 55         | 55          |
| Acute COPD                     | 55         | 55          |
| Acute Heart Failure            | 55         | 55          |
| Community Acquired Pneumonia   | 55         | 55          |
| Adult healthy volunteers       | 55         | 55          |
| Acute paediatrics Asthma       | 50         | 25          |
| Paediatrics healthy volunteers | 50         | 25          |
| <b>Total sample</b>            | <b>375</b> | <b>325</b>  |

**Table (1): Table summarising recruitment targets for both adult and paediatric groups.**

## 2.5. Schedule of assessments

A schedule of acute assessments is outlined below and aligns to the movement of acute patients through the clinical care pathway and the overall aim of developing a complete phenotypic picture of acutely breathless patients.

### 2.5.1. Defining acute breathlessness

At presentation (within 24 hours of admission) to one of three acute admissions units potentially eligible patients will be identified following confirmation of acute breathlessness, identified as (i) patient defined acute breathlessness and/or (ii) 1 unit increase above patient reported baseline in the extended medical research council (eMRC) dyspnoea score [47, 48] and at least one of the indicator

384 diagnoses identified as the primary clinical diagnosis by a senior clinical decision maker. eMRC will  
385 be completed by all patients and healthy volunteers at each research visit.

### 386 **2.5.2 Informed consent**

387 Patients meeting the pre-specified definition of acute breathlessness will be approached for informed  
388 consent in to the breath VOC biomarker study. Only patients that are eligible to give full written  
389 informed consent will be recruited.

### 390 **2.5.3 Collection of blood based pathology markers**

391 Collection of the blood biomarkers CRP, BNP, Troponin-I and blood eosinophil count will be  
392 performed both acutely and following recovery, when not taken as part of clinical care pathway.

393 These are currently used in profiling acutely breathless patients in clinical practice (**Table2**).

394

| Test                             | ANALYSER/METHOD                                                                                                        | LOWER LIMIT OF DETECTION | UPPER LIMIT OF DETECTION |
|----------------------------------|------------------------------------------------------------------------------------------------------------------------|--------------------------|--------------------------|
| C-Reactive protein (CRP)         | Siemens Advia Chemistry XPT, PEG enhanced immunoturbidimetric.<br>Siemens Advia 1800, PEG enhanced immunoturbidimetric | 5 mg/L                   | Diluted to result        |
| B-type natriuretic peptide (BNP) | Siemens Advia Centaur XPT, two-site sandwich immunoassay using direct chemiluminescent technology                      | 2.0 pg/mL                | 1445 pg/mL               |
| Troponin-I                       | Abbott Architect i2000SR, three-site sandwich immunoassay using direct chemiluminescent technology (CMIA).             | 5.0 ng/L                 | 50,000 ng/L              |

395 **Table (2):** Type of analyser and methodology used for blood biomarker calculation. The table  
396 outlines analyser make, methodology, upper and lower limits of detection as per the University  
397 Hospitals of Leicester NHS Foundation trust laboratory guidelines.

398

### 399 **2.5.4 Breath VOC sampling**

400 Offline breath sampling using GC-MS and comprehensive two-dimensional gas chromatography-  
401 mass spectrometry coupled with a standardised and CE marked breath sampler-ReCIVA<sup>®</sup>[49], will be  
402 performed. Gas chromatography is considered a gold standard technique in detecting volatile organic  
403 compounds and as such its sampling will be prioritised. Additionally the following online  
404 technologies, proton transfer mass spectroscopy (PTR-MS), gas chromatography - ion mobility

405 spectroscopy (GC-IMS) and atmospheric pressure chemical ionisation- mass spectrometry (APCI-  
 406 MS) will be evaluated according to the sampling strategy outlined in section 3, **Figure 3 and Table 3.**

|                                                                       | COPD |   | Asthma |   | Pneumonia |   | Heart Failure |   | Healthy |   | Paediatrics |   |
|-----------------------------------------------------------------------|------|---|--------|---|-----------|---|---------------|---|---------|---|-------------|---|
|                                                                       | 1    | 2 | 1      | 2 | 1         | 2 | 1             | 2 | 1       | 2 | 1           | 2 |
| Time point                                                            |      |   |        |   |           |   |               |   |         |   |             |   |
| Written informed consent                                              | x    |   | x      |   | x         |   | x             |   | x       |   | x           |   |
| <b>Volatile organic compound (VOC) sampling</b>                       |      |   |        |   |           |   |               |   |         |   |             |   |
| ReCIVA- gas chromatography and mass spectrometry (GC-MS)              | x    | x | x      | x | x         | x | x             | x | x       | x | x           | x |
| ReCIVA- comprehensive two-dimensional gas chromatography (GCxGC-MS)   | x    | x | x      | x | x         | x | x             | x | x       | x | x           | x |
| Atmospheric pressure chemical ionisation- mass spectrometry (APCI-MS) | x    | x | x      | x | x         | x | x             | x | x       | x | x           | x |
| Proton transfer reaction mass spectrometry (PTRMS)                    |      | x |        | x |           | x |               | x | x       | x | x           | x |
| Gas chromatography - ion mobility spectrometry (GC-IMS)               | x    |   | x      |   | x         |   | x             |   |         |   | x           | x |
| <b>Pathology blood tests</b>                                          |      |   |        |   |           |   |               |   |         |   |             |   |
| Full blood count (including differential cell count)                  | x    | x | x      | x | x         | x | x             | x | x       | x | x           | x |
| Brain natriuretic peptide (BNP) [pg/mL]                               | x    | x | x      |   | x         |   | x             | x | x       |   |             |   |
| Troponin-I [ng/L]                                                     | x    |   | x      |   | x         |   | x             |   | x       |   |             |   |
| C-Reactive protein (CRP) [mg/L]                                       | x    | x | x      | x | x         | x | x             | x | x       | x | x           | x |
| <b>Lung function tests</b>                                            |      |   |        |   |           |   |               |   |         |   |             |   |
| Hand held forced oscillation technique (FOT)                          | x    | x | x      | x | x         | x | x             | x | x       | x |             |   |
| Fractional exhaled nitric oxide (FeNO) - Flow rate 50 [ml/s]          |      |   | x      | x |           |   |               |   |         |   | x           | x |
| Spontaneous sputum sample                                             | x    | x | x      | x | x         | x | x             | x | x       | x |             |   |
| Bio-banking (urine, serum, plasma. sputum supernatants & plugs)       | x    | x | x      | x | x         | x | x             | x | x       | x | x           | x |
| Transthoracic echocardiography                                        | x    |   |        |   |           |   | x             |   |         |   |             |   |

407 **Table (3):** Summary of baseline and follow up assessments. The table summarises key assessments  
 408 carried out at different time points during the study. The participants may undertake any combination  
 409 of the investigations listed at any of these time points.

410

411

### 2.5.5. Collection of additional samples for future biomarker campaigns

Collection of additional biomarkers for future biomarker discovery campaigns including (i) a urine sample, (ii) blood samples, up to 85mls for DNA, RNA, plasma and serum and peripheral blood cell flow cytometry in selected subjects and (iii) spontaneous or induced sputum samples (plugs and supernatants) will be carried out (**Table 3**).

All samples will be collected at time point 1 and at 2 (**Figure 3**). The additional samples will be used for future omics analyses, these may include detailed analysis of the metagenome in sputum and proteomics applied to urine and serum samples.

### 2.5.6. Physiological characterisation

Physiological measures of lung function will be performed in acutely ill participants and at recovery including, (i) Hand held forced oscillation technique (FOT): an easily accessible measure of lung function. Patients favour this to spirometry as it is effort independent, unlike spirometry and requires less than a minute of quiet tidal breathing to obtain triplicate high quality measurements [50], This will be completed using Tremoflo®, Thorasys Thoracic Medical Systems Inc. (ii) Fractional exhaled nitric oxide (FeNO): A measure of airway inflammation in asthmatic patients[51, 52]. This instrument used for this will be NIOX VERO®, registered trademark of Circassia AB (PP-VERO-UK-0022-v1.0) (iii) Echocardiography: Two dimensional transthoracic echocardiography will be performed in heart failure and COPD patients using an iE 33 system with S5-1 transducer (frequency transmitted 1.7 MHz, received 3.4 MHz; Philips Medical Systems, Best, The Netherlands). Standard techniques as per American Society of Echocardiography guidelines (ASE)[53] will be used to acquire 2D, colour and Doppler images in conventional parasternal long-axis, short-axis and apical 4-, 2- and 3-chamber views. Left ventricular ejection fraction (LVEF)

1  
2  
3 437 will be calculated using the biplane method of discs formula (Simpson's rule) to derive left  
4  
5 438 ventricular volume indices.  
6  
7  
8

9 439 All participants are encouraged to report any testing related discomfort or concerns to the research  
10  
11 440 team to terminate the sampling process.  
12

### 13 441 **2.5.7 Recovery follow up**

14  
15 442 • Patient recovery will be defined as:

16  
17 443 (i) Patient reported recovery from the acute exacerbation spell and back to their  
18  
19 444 baseline extended MRC score or clinician defined recovery from the acute  
20  
21 445 exacerbation spell  
22

23  
24 446 and

25  
26 447 (ii) At least 6 weeks post exacerbation event (up to 6 months).  
27

28 448

29  
30 449 Patients that re admit to hospital between visits 1 and 2, can have additional visit 1 assessments. Visit  
31  
32 450 2 will be taken as recovery following the subsequent admission. If a patient is admitted to hospital  
33  
34 451 after visit 2 then they will be eligible to be recruited as a new study participant.  
35

36 452

37  
38 453 The schedule of assessments at the recovery visit is outlined (**Table 3**).  
39

40 454

### 41 42 455 **2.6. Clinical Adjudication:**

43  
44 456

45 457 In an effort to reduce data variability and minimise bias, an independent panel consisting of two senior  
46  
47 458 acute clinicians (SS & NG) will review all pertinent clinical and diagnostic source documentation,  
48  
49 459 whilst blinded to admission blood biomarkers and clinical diagnosis.  
50

51  
52 460 All acutely breathless adult patients' notes will be sequentially divided for adjudication. The panel will  
53  
54 461 independently determine the primary diagnosis of highest probability from a list of the four potential  
55  
56 462 acute indicator diagnoses in section 2.4 and mark their level of clinical certainty on a 100 mm visual  
57  
58 463 analogue scale (VAS scale). The panel members will be able to review imaging, electrocardiograms  
59  
60

1  
2  
3 464 (ECGs), and other relevant information but not admission blood based pathology tests.  
4

5 465 In a subset of patients adjudication will be validated by separate panel member to ensure between  
6  
7 466 observer agreement using Bland-Altman analysis and inter-rater agreement of the primary diagnosis  
8  
9 467 using Kohen's kappa via repeated evaluation of a subset of cases (see statistical methods section 2.3).  
10

11 468

## 14 469 **2.7. Clinical Informatics:**

15 470

17 471 Clinical data collection will be undertaken using a securely-hosted bespoke database system (ADD)  
18  
19 472 developed within the NIHR Leicester Biomedical Research Centre – Respiratory (BRC). The system  
20  
21 473 links acute admission episodes to hospital pathology records; historical respiratory physiology tests;  
22  
23 474 and demographic information. The system provides functionality to validate data entry; manually  
24  
25 475 verify records and highlight incomplete records. A custom VOC 'module' has been created to  
26  
27 476 support data collection within the study visits (1 and 2), and standardise diagnoses and medications  
28  
29 477 through the use of clinical ontologies as well as linking hospital records/tests to patient visits.  
30

31 478

33 479 Non-ADD based clinical data (e.g. hospital admissions, re-admissions and mortality) will be extracted  
34  
35 480 from the hospital data warehouse using identifiable patient identifiers, and subsequently  
36  
37 481 pseudonymised prior to integration.  
38

39 482

42 483 An informatics pipeline will be created to facilitate the transfer of chemo-metric data from remote  
43  
44 484 computers to the data repository. This will include tools to (i) enforce the correct labelling of data sets  
45  
46 485 (e.g. study number, visit, type/source of sample) prior to automated validated transfer to the  
47  
48 486 repository; (ii) record information about the sample process; (iii) search and extract data sets from the  
49  
50 487 repository for subsequent analysis. Prior to analysis, clinical and chemo-metric data will be integrated  
51  
52 488 using the study number and any potentially identifiable information will be removed.  
53

54 489

56 490

57 491

58  
59  
60



### 3. Breath profiling

The technologies utilised in the VOC study during discovery and replication phases are:

#### Offline technologies

- ReCIVA+ GC-MS
- ReCIVA + GC x GC-MS
- 

#### Online technologies

- GC-IMS
- PTR-MS
- APCI-MS

Offline technologies will underpin the discovery analyses owing to their ability to identify chemical identity and their recognition as the analytical gold standard in exhaled breath VOC analysis [54].

In contrast online technologies will be utilised for VOC biomarker replication and at the recovery visits owing to their portability and potential for future point of care testing. **(Figure 4)**.

A brief description of the core VOC platforms is provided below

A CE marked breath sampling device (ReCIVA®) developed by Owlstone Medical, will be used to sample breath onto two adsorbent Tenax tubes. Participants will be asked to breathe through the ReCIVA face mask for a maximum of 300 seconds, aiming for collection of  $\geq 80\%$  of the target sample volume of 1 litre, after which the Tenax tubes will be transferred to the laboratory for analysis. This effectively allows de-coupling of the breath sampling from the breath sensor and analysis platforms in selected patients that are not able to mobilise to a real time breath sampling device. The Owlstone ReCIVA sampler will be utilised in breath collection for offline technologies namely GC-MS and GCxGC-MS. The ReCIVA sampler is capable of entraining oxygen and is therefore suitable for patients with mild respiratory failure requiring low flow rates of oxygen to maintain target oxygen saturations [49].

1  
2  
3 519 **3.1. Gas chromatography and mass spectroscopy (GC-MS):** is a commonly applied methodology  
4  
5 520 used to accurately measure trace gases in complex mixtures such as exhaled air [54]. Pre-  
6  
7 521 concentrating breath volatiles by various means and subsequent analysis constitute a reliable and  
8  
9 522 sensitive method for VOC analysis [55]. Despite its high sensitivity, it is however, a time consuming  
10  
11 523 technique and carries a risk of contamination at the pre-concentration step. It is also not suitable for  
12  
13 524 online and multiple measurements limiting its use as a point-of-care testing technology for VOC [56].  
14  
15  
16 525 The instrument used will be an Agilent 7890A gas chromatogram with a 5977a quadrupole mass  
17  
18 526 spectrometer (Agilent Technologies Ltd, Stockport, UK), interfaced with a Markes Unity 2 thermal  
19  
20 527 desorptionunit (Markes International Ltd, Llantrisant, UK).

21  
22  
23 528 **3.2. Comprehensive two-dimensional gas chromatography-mass spectrometry (GCxGC-MS):** an  
24  
25 529 advanced analytical technique for the analysis of complex organic matrices; its main advantage is the  
26  
27 530 unparalleled separation power it affords over conventional one-dimensional chromatographic  
28  
29 531 techniques [57]. Previous research, albeit sparse, has demonstrated the potential of GCxGC-MS for  
30  
31 532 breath analysis with the number of VOC detected exceeding those detected by conventional GC-MS  
32  
33 533 [58, 59]. GCxGC-MS of breath metabolites has been used for the identification of biomarkers related  
34  
35 534 to glucose metabolism [60, 61], tuberculosis [62] and radiation response [63]. This has generated  
36  
37 535 interest within the breath research community, however, such studies were conducted on a small scale  
38  
39 536 (<50 patients) and involved the use of expensive detectors and modulators. Method development and  
40  
41 537 analysis of the data-rich GCxGC chromatograms, however, can be time-consuming and require  
42  
43 538 specialist knowledge.

44  
45  
46  
47 539 The instrument used will be an Agilent 7890A gas chromatogram, fitted with a G3486A CFT flow  
48  
49 540 modulator and a three-way splitter plate coupled to a flame ionisation detector and a HES 5977B  
50  
51 541 quadrupole mass spectrometer (Agilent Technologies Ltd, Stockport, UK), interfaced with a Markes  
52  
53 542 TD-100xr thermal desorption autosampler (Markes International Ltd, Llantrisant, UK).

54  
55  
56 543 **3.3. Proton-transfer-reaction mass spectrometry (PTRMS):** a real time technique, capable of  
57  
58 544 simultaneously measuring the evolution of multiple gas metabolites from a single breath. It has been  
59  
60

1  
2  
3 545 used for the identification of potential useful VOC biomarkers for diagnosis of a variety of diseases:  
4  
5 546 including various cancers[64-66], liver disease[67, 68] and respiratory disease[69]. It has several  
6  
7 547 advantages in clinical settings, such as the speed of sampling, the instant result achieved and the lack  
8  
9 548 of need for sample storage or shipping. However, owing to the lack of pre-concentration or  
10  
11 549 chromatographic separation, sensitivity and definitive compound identification can be somewhat  
12  
13  
14 550 limited when compared to GC-MS.

15  
16 551 Two breath sampling devices will be used. The first device is a Loccioni SOFIA GSI-S; the subject is  
17  
18 552 required to exhale a single breath, five times (three if providing five samples proves too difficult) into  
19  
20 553 a sterile mouthpiece connected to an electrostatic bacterial/viral filter whilst wearing a nose clip (all  
21  
22 554 CE marked). Flow from the mouthpiece passes into a gas sampling interface capnograph (Loccioni  
23  
24 555 GSI-S – CE marked) and real-time user feedback of flow is provided on screen, allowing the  
25  
26 556 regulation of the breath sampling rate. The gas sampling interface acts to simultaneously trigger the  
27  
28 557 acquisition of the PTR-ToF-MS data and the exhaled breath travels through the capnograph down a  
29  
30 558 heated sample line into the ion source of the PTR-ToF-MS

31  
32  
33  
34 559 The second breath sampling device is a ReCIVA breath sampler (Owlstone) with one of the adsorbent  
35  
36 560 Tenax tubes replaced with an outlet tube adapted for online sampling. The exhaled breath is  
37  
38 561 transferred to the PTR-ToF-MS via a heated transfer line connected to the outlet tube, continuously  
39  
40 562 drawn at a constant flow rate by the PTR-ToF-MS. The online adaptation of the consumable  
41  
42 563 adsorbent tube does not affect the CE mark of the ReCIVA sampling device.

43  
44  
45 564 Once the breath sample reaches the PTR-ToF-MS, via either breath sampler, the breath mixes with  
46  
47 565 protonated water ( $H_3O^+$ ) inducing proton transfer to the target volatile organic compounds (VOCs)  
48  
49 566 present, resulting in their ionisation. Sample ions are then guided into the time of flight mass  
50  
51 567 spectrometer and mass spectra, showing the abundance and mass of the VOCs present, are collected  
52  
53 568 throughout the exhalation. Following sampling, mouthpieces, filters and nose clips are disposed of  
54  
55 569 and all patient contacted surfaces wiped down with antiseptic cleaning wipes in preparation for the  
56  
57  
58 570 next patient.

1  
2  
3 571 The instrument used will be a Kore Series II high performance proton transfer reaction-time of flight-  
4  
5 572 mass spectrometer (Kore Technology Ltd, Cambridge, UK).  
6  
7

8 573  
9

10 574 **3.4. Gas chromatography- ion mobility spectrometry (GC-IMS) (B&S Analytik):** Allows the  
11  
12 575 detection of volatile organic compounds down to ultra-trace level (ng/L - to pg/L - range). For years,  
13  
14 576 IMS has been used to discover potential discriminatory breath VOC in lung cancer [70, 71],  
15  
16 577 COPD[72, 73] and asthma[73]. Sampling takes place using a SpiroScout spirometer. The patients  
17  
18 578 exhale through a disposable mouth piece connected to a Teflon tube. A piezoelectric pressure sensor  
19  
20 579 is used to monitor the breathing profile, this opens the sampling valve at the appropriate point in the  
21  
22 580 breath profile to collect end-tidal breath in a sample loop of 10 mL volume. After filling this loop, the  
23  
24 581 collected sample air is then transferred to a multicapillary column for a chromatographic separation,  
25  
26 582 which is achieved in 12 min. The separated molecules are then transferred into the IMS, ionised and  
27  
28 583 then separated according to their mobility in a weak electric field.  
29  
30 584 The technology's multiple advantages of ultra-sensitivity, portability, online sampling and short  
31  
32 585 analysis time (typical analysis time of 10 minutes) with real time detection, brings a promise to  
33  
34 586 provide immediate and potentially reliable results for point of care breath diagnostics. Another  
35  
36 587 concept with IMS devices is that once the required breath signatures have been discovered using GC-  
37  
38 588 MS, IMS offers the potential to be 'tuned' for selective detection of VOC.  
39  
40  
41  
42

43 589 The instrument used will be a BioScout a multi-capillary column gas chromatogram-ion mobility  
44  
45 590 spectrometer, with a <sup>63</sup>Ni ion source, interfaced with a SpiroScout breath sampler (BS Analytik,  
46  
47 591 Dortmund, Germany).  
48  
49

50 592  
51  
52

53 593 **3.5. Atmospheric pressure chemical ionisation- mass spectrometry (APCI-MS) semiportable**  
54  
55 594 **compact version (Advion):** is one of less sensitive but more affordable versions of mass spectrometers  
56  
57 595 released to the commercial market in recent years. The device uses APCI to produce ions. Although  
58  
59 596 the most common use of APCI-MS systems is the detection in liquid chromatography applications,  
60

1  
2  
3 597 the technique has proven to be a valuable tool for direct measurement of VOC in air[74, 75] food[76,  
4  
5 598 77] and breath[78, 79]. Recently, the technique has shown potential for online, real time profiling of  
6  
7 599 pseudo-metabolites in exhaled breath [80] with sensitivity comparable with other techniques. By  
8  
9 600 combining miniaturised MS technology with APCI techniques, adequate quality of on-site, real time  
10  
11 601 measurements with minimal or no sample preparation requirement can be provided. This is a desirable  
12  
13 602 outcome as it overcomes main limitation of using standard breath analysis method in clinical setting,  
14  
15 603 which is a need for breath sample collection followed by desorption and time-consuming laboratory  
16  
17  
18 604  
19  
20 605  
21 637 There remains an overall lack of standardisation and rigour across these technologies which hindered  
22  
23 638 previous advancements in breath discovery; something we intend to minimize.

24  
25 639 The instrument used will be an Advion Compact Mass Spectrometer Express, with atmospheric  
26  
27 640 pressure chemical ionisation, interfaced with a heated breath sampling line (Advion, New York,  
28  
29 641 USA).

30  
31  
32 642

#### 33 34 35 643 **4. Chemometric processing and data analysis:**

36  
37 644 GC-MS breath data will be aligned, deconvoluted and the features for each participant will be  
38  
39 645 extracted. The extracted features will be grouped and classified by retention index and mass spectrum.  
40  
41 646 The registered and aligned data will be linked to participant meta-data to generate a breath matrix.  
42  
43 647 Data handling and analysis will be performed by a senior statistician.

44  
45  
46 648 The breath matrix is a  $n \times p$  matrix where  $n$  is the number of subjects and  $p$  is the number of VOC. The  
47  
48 649 breath matrix is high dimensional with  $p \gg n$  and many potentially correlated VOC. In view of this, we  
49  
50 650 will employ sparse partial least squares discriminant analysis (sPLS-DA)[81] to investigate which of  
51  
52 651 the VOC can identify breathlessness. We will also investigate which of the VOC can discriminate  
53  
54 652 between the different disease states including acute exacerbations of asthma and COPD and  
55  
56  
57  
58  
59  
60

1  
2  
3 653 Pneumonia. In addition to the supervised methods, unsupervised methods will be explored,  
4  
5 654 specifically sparse principle component analysis (sPCA)[82].  
6  
7  
8 655 Extracted VOC will also be investigated. Relationships between VOC and patient reported acute  
9  
10 656 breathlessness will be analysed using logistic regression model. VOC associated with patient  
11  
12 657 associated acute breathlessness will be incorporated into multinomial logistic regression models in  
13  
14 658 conjunction with CRP, BNP, blood eosinophils and Troponin-I, pathology biomarkers currently in use  
15  
16 659 for diagnosing undifferentiated breathlessness. In addition to the conventional binary and multinomial  
17  
18 660 logistic regression models, regression models [83].  
19  
20  
21

## 22 661 **5. Ethics and dissemination:**

23  
24 662 The study has obtained full ethical approval from the London South East Research ethics Committee,  
25  
26 663 REC reference 16/LO/1747. IRAS project ID 198921. Publications will be prepared according to the  
27  
28 664 MRC-EMBER consortium agreement and the University of Leicester publications policy. All intended  
29  
30 665 publications will be submitted to the EMBER executive board for review and comments within 60 days  
31  
32 666 of journal submission. Authorship will be according to contribution and internationally recognised  
33  
34 667 guidance on journal authorship.  
35  
36  
37

38  
39 668 **6. Study dates:** 01/2/2017 – 30/10/2020

## 40 669 **7. Authors' contributions:**

41  
42  
43 670  
44  
45  
46 671 S.S, C.E.B, N.Gr, P.Th and P.Mo conceived the study, obtained funding, wrote the study protocol,  
47  
48 672 obtained ethical and MHRA approvals for the study and coordinated the deployment of analytical  
49  
50 673 testing methods for breath analysis. W.I took the lead in writing the manuscript with support from  
51  
52 674 S.S. Planning and recruitment of adult participants was carried out by W.I, S.Jo, B.Pa, A.Aw, R.Ph,  
53  
54 675 G.Fo, A.Yo, R. J. R and C.Wh. Paediatrics study design was conceived by E.Ga and C.Be and  
55  
56 676 participants recruited by T. Mc and C. Fo. Analytical chemistry team formed of M.Wi, R.Co, D.Sa,  
57  
58 677 D.Ru and L.Br expertly handled all the breath samples and planned an analysis structure. M.Ri, a  
59  
60

1  
2  
3 678 senior statistician, constructed a statistics and data analysis plan in conjunction with SS.  
4  
5 679 Bioinformatics pipeline and electronic CRFs developed by R.Fr and B.Zh. All authors, including  
6  
7 680 R.Pe, H. Bh, B.Ha, A. Si, K. Ry, H. Pa, T. Su, L. L Ng, T. Co contributed to the study design and  
8  
9 681 study protocol.  
10  
11  
12

13 682 **8. Protocol version:** Version 4, 1<sup>st</sup> April 2018  
14  
15  
16 683

17  
18 684 **9. Public and patient involvement:**  
19

20 685 A series of consultations have taken place with our patient involvement team within the NIHR Biomedical  
21  
22 686 Research Centre (Respiratory Theme) and across the wider BRC PPI group. Representations from the  
23  
24 687 paediatrics team were also present. This group was sent copies of the participant documentation for review  
25  
26 688 and discussion. Various revisions have been made following on from these discussions.  
27  
28  
29

30 689 **10. Funding statement:**  
31

32 690 Research funding was provided by the MRC and EPSRC Stratified Medicine Grant for Molecular  
33  
34 691 Pathology Nodes (Grant No. MR/N005880/1). The research was supported by the National Institute  
35  
36 692 for Health Research (NIHR) Leicester Biomedical Research Centre and NIHR, Leicester Clinical  
37  
38 693 Research Facility and the Midlands Asthma and Allergy Research Association (MAARA) to whom  
39  
40 694 we are extremely grateful. The authors would like to acknowledge the invaluable efforts of the  
41  
42 695 research nurses responsible for the in-clinic sample collection as well as the input from the wider  
43  
44 696 EMBER consortium (Members list can be found at: <https://ember.le.ac.uk/web>). The views expressed  
45  
46 697 are those of the author(s) and not necessarily those of the NHS and NIHR or the Department of Health  
47  
48  
49

50 698

51  
52 699 **11. Competing interests:** SS has performed advisory services for Owlstone Medical.  
53  
54  
55 700

56 701

57 702

58  
59  
60



1  
2  
3 **703 Figure legends:**  
4

5 **704 Figure (1)** Relationship between lung proximity and degree of invasiveness of different lung  
6  
7 **705** matrices. The figure plots the level of invasiveness of various lung matrices in relation to their  
8  
9 **706** proximity to the lung. Given their pathological relevance, the degree of invasiveness of  
10  
11 **707** bronchoalveolar lavage (BAL) and lung biopsy makes them less favourable in diagnosing respiratory  
12  
13 **708** diseases.  
14

15  
16 **709 Figure (2)** Multi-instrument use in breath sampling. Figure illustrates the various combinations of  
17  
18 offline and online devices used in breath sampling and the relevant pros and cons. Offline and online  
19  
20 technologies are used for the discovery and validation phases of the study respectively.  
21  
22

23  
24 **712 Figure (3)** Study flow chart. Figure outlines the patient journey from admission through to discharge  
25  
26 and follow up. Participants with self-reported acute breathlessness presenting to University Hospitals  
27  
28 of Leicester are recruited within 24 hours following a senior decision maker review. Breath sampling  
29  
30 is carried out on the first visit, at recruitment, and the second visit, up to 6 months after discharge.  
31  
32 **716** Patients are admitted through the standard operational emergency medical streaming and care  
33  
34 pathways at the University Hospitals of Leicester NHS Trust. Early outcomes (hospital readmission)  
35  
36 are measured at 30 and 60 days and late outcomes (mortality) including respiratory and all-cause  
37  
38 mortality are measured at 2 years. Assessments carried out at each time point are summarised in  
39  
40

41 **720 Table 1.**  
42

43  
44 **721 Figure (4)** Multi-instrument use in breath sampling. Operational space of the analytical technologies  
45  
46 used in EMBER for the analysis of volatile organic compounds (VOC) in exhaled breath, including  
47  
48 proton transfer reaction-mass spectrometry (PTR-MS), atmospheric pressure chemical ionisation-  
49  
50 mass spectrometry (CMS), gas chromatography-ion mobility spectrometry (GC-IMS), gas  
51  
52 chromatography-mass spectrometry (GC-MS) and two-dimensional gas chromatography-mass  
53  
54 spectrometry (GCxGC). Comparing the typical molar mass range detectable; selectivity in detection  
55  
56 owing to the type of ionisation involved and the proton affinity of analytes; and the inclusion of a  
57  
58 chromatographic separation affecting total time of analysis. The online technologies involving  
59  
60



1  
2  
3 729 chemical ionisation (PTR-MS, CMS and GC-IMS) can be used in-clinic owing to short analysis  
4  
5 730 times, but only detect lower molar mass molecules with a proton affinity higher than 697 KJ mol<sup>-1</sup>.  
6  
7 731 Offline chromatographic techniques (GC-MS and GCxGC) detect a wider range of compounds  
8  
9 732 independent of proton affinity; however, the techniques have longer analysis times and involve  
10  
11 733 sample transportation and storage.  
12

13  
14 734

15  
16 735

17  
18 736

19  
20 737

21  
22 738

23  
24 739

25  
26 740

27  
28 741

29  
30 742

31  
32 743

33  
34 744

35  
36 745

37  
38 746

39  
40 747

41  
42 748

43  
44 749

45  
46 750

47  
48 751

49  
50 752

51  
52 753

53  
54 754

55  
56 755

57  
58  
59  
60

For peer review only

## 8. References

1. Stephenson, J.J., et al., *Clinical and economic burden of dyspnea and other COPD symptoms in a managed care setting*. *Int J Chron Obstruct Pulmon Dis*, 2017. **12**: p. 1947-1959.
2. David Ponka, M.K., *Top differential diagnoses in family medicine Dyspnoea Can Fam Physician*. Canadian Family Physician, 2008.
3. Figarska, S.M., H.M. Boezen, and J.M. Vonk, *Dyspnea severity, changes in dyspnea status and mortality in the general population: the Vlagtwedde/Vlaardingen study*. *European Journal of Epidemiology*, 2012. **27**(11): p. 867-876.
4. Parshall, M.B., et al., *An Official American Thoracic Society Statement: Update on the Mechanisms, Assessment, and Management of Dyspnea*. *American Journal of Respiratory and Critical Care Medicine*, 2012. **185**(4): p. 435-452.
5. Lim, W.S., et al., *BTS guidelines for the management of community acquired pneumonia in adults: update 2009*. *Thorax*, 2009. **64 Suppl 3**: p. iii1-55.
6. Leuzzi, G., et al., *C-reactive protein level predicts mortality in COPD: a systematic review and meta-analysis*. *Eur Respir Rev*, 2017. **26**(143).
7. Moe, G.W., *B-type natriuretic peptide in heart failure*. *Curr Opin Cardiol*, 2006. **21**(3): p. 208-14.
8. Ponikowski, P., et al., *2016 ESC Guidelines for the diagnosis and treatment of acute and chronic heart failure: The Task Force for the diagnosis and treatment of acute and chronic heart failure of the European Society of Cardiology (ESC) Developed with the special contribution of the Heart Failure Association (HFA) of the ESC*. *Eur Heart J*, 2016. **37**(27): p. 2129-2200.
9. Alex Sakula, *Charcot leyden crystals and crushmann spirals*. *Thorax*, 1986.
10. Calhoun, W.J., J. Sedgwick, and W.W. Busse, *The role of eosinophils in the pathophysiology of asthma*. *Ann N Y Acad Sci*, 1991. **629**: p. 62-72.
11. Pavord, I.D., *Eosinophilic phenotypes of airway disease*. *Ann Am Thorac Soc*, 2013. **10 Suppl**: p. S143-9.
12. Tashkin, D.P. and M.E. Wechsler, *Role of eosinophils in airway inflammation of chronic obstructive pulmonary disease*. *International Journal of Chronic Obstructive Pulmonary Disease*, 2018. **13**: p. 335-349.
13. Bafadhel, M., et al., *Blood Eosinophils to Direct Corticosteroid Treatment of Exacerbations of Chronic Obstructive Pulmonary Disease: A Randomized Placebo-Controlled Trial*. *American Journal of Respiratory and Critical Care Medicine*, 2012. **186**(1): p. 48-55.
14. Bedossa, P. and K. Patel, *Biopsy and Noninvasive Methods to Assess Progression of Nonalcoholic Fatty Liver Disease*. *Gastroenterology*, 2016. **150**(8): p. 1811-1822 e4.
15. Fens, N., et al., *Exhaled breath analysis by electronic nose in airways disease. Established issues and key questions*. *Clin Exp Allergy*, 2013. **43**(7): p. 705-15.
16. Probert, C.S., et al., *Volatile organic compounds as diagnostic biomarkers in gastrointestinal and liver diseases*. *J Gastrointest Liver Dis*, 2009. **18**(3): p. 337-43.
17. Schubert, J.K., et al., *Breath analysis in critically ill patients: potential and limitations*. *Expert Rev Mol Diagn*, 2004. **4**(5): p. 619-29.
18. Fowler, S.J., et al., *Surveillance for lower airway pathogens in mechanically ventilated patients by metabolomic analysis of exhaled breath: a case-control study*. *Thorax*, 2015. **70**(4): p. 320-5.
19. Florian Gahleitner, C.G.-H., Caroline S Beardsmore, Hitesh C Pandya, CL Paul Thomas, *Metabolomics pilot study to identify VOC of childhood asthma in exhaled breath*. *Bioanalysis*, 2013.
20. Van Berkel, J.J., et al., *A profile of volatile organic compounds in breath discriminates COPD patients from controls*. *Respir Med*, 2010. **104**(4): p. 557-63.

- 1  
2  
3 805 21. Basanta, M., et al., *Exhaled volatile organic compounds for phenotyping chronic obstructive*  
4 806 *pulmonary disease: a cross-sectional study*. *Respir Res*, 2012. **13**: p. 72.
- 5 807 22. Besa, V., et al., *Exhaled volatile organic compounds discriminate patients with chronic*  
6 808 *obstructive pulmonary disease from healthy subjects*. *International Journal of Chronic*  
7 809 *Obstructive Pulmonary Disease*, 2015. **10**: p. 399-406.
- 8 810 23. Hauschild, A.C., J.I. Baumbach, and J. Baumbach, *Integrated statistical learning of metabolic*  
9 811 *ion mobility spectrometry profiles for pulmonary disease identification*. *Genet Mol Res*, 2012.  
10 812 **11**(3): p. 2733-44.
- 11 813 24. Jareno-Esteban, J.J., et al., *Study of 5 Volatile Organic Compounds in Exhaled Breath in*  
12 814 *Chronic Obstructive Pulmonary Disease*. *Archivos De Bronconeumologia*, 2017. **53**(5): p. 251-  
13 815 256.
- 14 816 25. Paredi, P., et al., *Exhaled ethane, a marker of lipid peroxidation, is elevated in chronic*  
15 817 *obstructive pulmonary disease*. *Am J Respir Crit Care Med*, 2000. **162**(2 Pt 1): p. 369-73.
- 16 818 26. Caldeira, M., et al., *Profiling allergic asthma volatile metabolic patterns using a headspace-*  
17 819 *solid phase microextraction/gas chromatography based methodology*. *J Chromatogr A*, 2011.  
18 820 **1218**(24): p. 3771-80.
- 19 821 27. Caldeira, M., et al., *Allergic asthma exhaled breath metabolome: a challenge for*  
20 822 *comprehensive two-dimensional gas chromatography*. *J Chromatogr A*, 2012. **1254**: p. 87-97.
- 21 823 28. Dallinga, J.W., et al., *Volatile organic compounds in exhaled breath as a diagnostic tool for*  
22 824 *asthma in children*. *Clin Exp Allergy*, 2010. **40**(1): p. 68-76.
- 23 825 29. Dragonieri, S., et al., *An electronic nose in the discrimination of patients with asthma and*  
24 826 *controls*. *J Allergy Clin Immunol*, 2007. **120**(4): p. 856-62.
- 25 827 30. Fens, N., et al., *Exhaled breath profiling enables discrimination of chronic obstructive*  
26 828 *pulmonary disease and asthma*. *Am J Respir Crit Care Med*, 2009. **180**(11): p. 1076-82.
- 27 829 31. Ibrahim, B., et al., *Non-invasive phenotyping using exhaled volatile organic compounds in*  
28 830 *asthma*. *Thorax*, 2011. **66**(9): p. 804-9.
- 29 831 32. Montuschi, P., et al., *Diagnostic performance of an electronic nose, fractional exhaled nitric*  
30 832 *oxide, and lung function testing in asthma*. *Chest*, 2010. **137**(4): p. 790-6.
- 31 833 33. Christiansen, A., et al., *A systematic review of breath analysis and detection of volatile*  
32 834 *organic compounds in COPD*. *J Breath Res*, 2016. **10**(3): p. 034002.
- 33 835 34. de Vries, R., et al., *Integration of electronic nose technology with spirometry: validation of a*  
34 836 *new approach for exhaled breath analysis*. *J Breath Res*, 2015. **9**(4): p. 046001.
- 35 837 35. Shafiek, H., et al., *Using the Electronic Nose to Identify Airway Infection during COPD*  
36 838 *Exacerbations*. *PLoS One*, 2015. **10**(9): p. e0135199.
- 37 839 36. Finamore, P., et al., *Analysis of volatile organic compounds: an innovative approach to heart*  
38 840 *failure characterization in older patients*. *J Breath Res*, 2018. **12**(2): p. 026007.
- 39 841 37. *MRC Molecular Pathology, Review 20 Aug.*
- 40 842 38. *Medical Research Council, Molecular Pathology Nodes*. 2014: MRC website.
- 41 843 39. Corradi, M., et al., *Aldehydes in exhaled breath condensate of patients with chronic*  
42 844 *obstructive pulmonary disease*. *Am J Respir Crit Care Med*, 2003. **167**(10): p. 1380-6.
- 43 845 40. Larstad, M., et al., *Determination of malondialdehyde in breath condensate by high-*  
44 846 *performance liquid chromatography with fluorescence detection*. *J Chromatogr B Analyt*  
45 847 *Technol Biomed Life Sci*, 2002. **766**(1): p. 107-14.
- 46 848 41. F. Y. Hsieh, D.A.B., Michael D. Larsen., *A simple method of sample size calculation for linear*  
47 849 *and logistic regression* *Statis Med*, 1998.
- 48 850 42. Hajian-Tilaki, K., *Sample size estimation in diagnostic test studies of biomedical informatics*. *J*  
49 851 *Biomed Inform*, 2014. **48**: p. 193-204.
- 50 852 43. Quan, H., et al., *Updating and validating the Charlson comorbidity index and score for risk*  
51 853 *adjustment in hospital discharge abstracts using data from 6 countries*. *Am J Epidemiol*,  
52 854 2011. **173**(6): p. 676-82.
- 53  
54  
55  
56  
57  
58  
59  
60

- 1  
2  
3 855 44. Roffman, C.E., J. Buchanan, and G.T. Allison, *Charlson Comorbidities Index*. J Physiother, 2016. **62**(3): p. 171.
- 4 856  
5 857 45. Bjarnason, H. and P. Hougaard, *Fisher information for two gamma frailty bivariate Weibull*  
6 858 *models*. Lifetime Data Anal, 2000. **6**(1): p. 59-71.
- 7 859 46. Lawrence Gould, A., et al., *Joint modeling of survival and longitudinal non-survival data:*  
8 860 *current methods and issues. Report of the DIA Bayesian joint modeling working group*. Stat  
9 861 Med, 2015. **34**(14): p. 2181-95.
- 10 862 47. Steer, J., et al., *Dyspnoea severity and pneumonia as predictors of in-hospital mortality and*  
11 863 *early readmission in acute exacerbations of COPD*. Thorax, 2012. **67**(2): p. 117-21.
- 12 864 48. Tsimogianni, A.M., et al., *Predictors of Outcome After Exacerbation of Chronic Obstructive*  
13 865 *Pulmonary Disease*. Journal of General Internal Medicine, 2009. **24**(9): p. 1043-1048.
- 14 866 49. Kitchen, S., et al., *LATE-BREAKING ABSTRACT: Breathe free: Open source development of a*  
15 867 *breath sampler by a consortium of breath researchers*. European Respiratory Journal, 2015.  
16 868 **46**(suppl 59).
- 17 869 50. Oostveen, E., et al., *The forced oscillation technique in clinical practice: methodology,*  
18 870 *recommendations and future developments*. Eur Respir J, 2003. **22**(6): p. 1026-41.
- 19 871 51. Pendharkar, S. and S. Mehta, *The clinical significance of exhaled nitric oxide in asthma*.  
20 872 Canadian Respiratory Journal : Journal of the Canadian Thoracic Society, 2008. **15**(2): p. 99-  
21 873 106.
- 22 874 52. Yates, D.H., *Role of exhaled nitric oxide in asthma*. Immunol Cell Biol, 2001. **79**(2): p. 178-90.
- 23 875 53. Lang, R.M., et al., *Recommendations for chamber quantification: a report from the American*  
24 876 *Society of Echocardiography's Guidelines and Standards Committee and the Chamber*  
25 877 *Quantification Writing Group, developed in conjunction with the European Association of*  
26 878 *Echocardiography, a branch of the European Society of Cardiology*. J Am Soc Echocardiogr,  
27 879 2005. **18**(12): p. 1440-63.
- 28 880 54. J. Throck Watson, O.D.S., *Introduction to Mass Spectrometry: Instrumentation, Applications,*  
29 881 *and Strategies for Data Interpretation, 4th Edition*. 2007: Wiley. 862.
- 30 882 55. Buszewski, B., et al., *Human exhaled air analytics: biomarkers of diseases*. Biomed  
31 883 Chromatogr, 2007. **21**(6): p. 553-66.
- 32 884 56. Amann, A., et al., *Applications of breath gas analysis in medicine*. International Journal of  
33 885 Mass Spectrometry, 2004. **239**(2-3): p. 227-233.
- 34 886 57. Almstetter, M.F., P.J. Oefner, and K. Dettmer, *Comprehensive two-dimensional gas*  
35 887 *chromatography in metabolomics*. Anal Bioanal Chem, 2012. **402**(6): p. 1993-2013.
- 36 888 58. Das, M.K., et al., *Investigation of Gender-Specific Exhaled Breath Volatome in Humans by*  
37 889 *GCxGC-TOF-MS*. Analytical Chemistry, 2014. **86**(2): p. 1229-1237.
- 38 890 59. Phillips, M., et al., *Detection of an extended human volatome with comprehensive two-*  
39 891 *dimensional gas chromatography time-of-flight mass spectrometry*. PLoS One, 2013. **8**(9): p.  
40 892 e75274.
- 41 893 60. Gruber, B., et al., *Vacuum ultraviolet absorption spectroscopy in combination with*  
42 894 *comprehensive two-dimensional gas chromatography for the monitoring of volatile organic*  
43 895 *compounds in breath gas: A feasibility study*. J Chromatogr A, 2016. **1464**: p. 141-6.
- 44 896 61. Gruber, B., et al., *Breath gas monitoring during a glucose challenge by a combined PTR-*  
45 897 *QMS/GCxGC-TOFMS approach for the verification of potential volatile biomarkers*. J Breath  
46 898 Res, 2016. **10**(3): p. 036003.
- 47 899 62. Mellors, T.R., et al., *A new method to evaluate macaque health using exhaled breath: A case*  
48 900 *study of M. tuberculosis in a BSL-3 setting*. J Appl Physiol (1985), 2017. **122**(3): p. 695-701.
- 49 901 63. Phillips, M., et al., *Breath biomarkers of whole-body gamma irradiation in the Gottingen*  
50 902 *minipig*. Health Phys, 2015. **108**(5): p. 538-46.
- 51 903 64. Bajtarevic, A., et al., *Noninvasive detection of lung cancer by analysis of exhaled breath*. BMC  
52 904 Cancer, 2009. **9**: p. 348.
- 53  
54  
55  
56  
57  
58  
59  
60



- 1  
2  
3 905 65. Lavra, L., et al., *Investigation of VOCs associated with different characteristics of breast*  
4 906 *cancer cells*. Sci Rep, 2015. **5**: p. 13246.
- 5 907 66. Zhou, W., et al., *Exhaled breath online measurement for cervical cancer patients and healthy*  
6 908 *subjects by proton transfer reaction mass spectrometry*. Anal Bioanal Chem, 2017. **409**(23):  
7 909 p. 5603-5612.
- 8 910 67. Fernández del Río, R., et al., *Volatile Biomarkers in Breath Associated With Liver Cirrhosis —*  
9 911 *Comparisons of Pre- and Post-liver Transplant Breath Samples*. EBioMedicine, 2015. **2**(9): p.  
10 912 1243-1250.
- 11 913 68. O'Hara, M.E., et al., *Limonene in exhaled breath is elevated in hepatic encephalopathy*. J  
12 914 *Breath Res*, 2016. **10**(4): p. 046010.
- 13 915 69. Tomasz Ligor, C.A., Anton Amann, Konrad Schwarz, Bogusaw Buszewski, Wojciech ebrowski,,  
14 916 *<Comparison of Proton Transfer Reaction-Mass Spectrometry and Gas Chromatography-*  
15 917 *Mass Spectrometry in Analysis of Breath Samples.pdf>*. Chem. Anal., 2009.
- 16 918 70. Darwiche, K., et al., *Bronchoscopically obtained volatile biomarkers in lung cancer*. Lung,  
17 919 2011. **189**(6): p. 445-52.
- 18 920 71. Handa, H., et al., *Exhaled Breath Analysis for Lung Cancer Detection Using Ion Mobility*  
19 921 *Spectrometry*. PLoS ONE, 2014. **9**(12): p. e114555.
- 20 922 72. Bessa, V., et al., *Detection of volatile organic compounds (VOCs) in exhaled breath of patients*  
21 923 *with chronic obstructive pulmonary disease (COPD) by ion mobility spectrometry*.  
22 924 *International Journal for Ion Mobility Spectrometry*, 2011. **14**(1): p. 7-13.
- 23 925 73. Schivo, M., et al., *Mobile instrumentation platform to distinguish airway disorders*. Journal of  
24 926 *breath research*, 2013. **7**(1): p. 017113-017113.
- 25 927 74. Badjagbo, K., et al., *Direct atmospheric pressure chemical ionization-tandem mass*  
26 928 *spectrometry for the continuous real-time trace analysis of benzene, toluene, ethylbenzene,*  
27 929 *and xylenes in ambient air*. J Am Soc Mass Spectrom, 2009. **20**(5): p. 829-36.
- 28 930 75. Healy, R.M., et al., *A multi-year study of VOC emissions at a chemical waste disposal facility*  
29 931 *using mobile APCI-MS and LPCI-MS instruments*. Environ Pollut, 2018. **232**: p. 220-228.
- 30 932 76. Linforth, R. and A.J. Taylor, *Persistence of Volatile Compounds in the Breath after Their*  
31 933 *Consumption in Aqueous Solutions*. Journal of Agricultural and Food Chemistry, 2000. **48**(11):  
32 934 p. 5419-5423.
- 33 935 77. Perez-Hurtado, P., et al., *Direct analysis of volatile organic compounds in foods by headspace*  
34 936 *extraction atmospheric pressure chemical ionisation mass spectrometry*. Rapid Commun  
35 937 *Mass Spectrom*, 2017. **31**(22): p. 1947-1956.
- 36 938 78. Berchtold, C., L. Meier, and R. Zenobi, *Evaluation of extractive electrospray ionization and*  
37 939 *atmospheric pressure chemical ionization for the detection of narcotics in breath*.  
38 940 *International Journal of Mass Spectrometry*, 2011. **299**(2-3): p. 145-150.
- 39 941 79. Kapishon, V., et al., *Atmospheric pressure chemical ionization mass spectrometry of pyridine*  
40 942 *and isoprene: potential breath exposure and disease biomarkers*. J Breath Res, 2013. **7**(2): p.  
41 943 026005.
- 42 944 80. Heaney, L.M., et al., *Real-time monitoring of exhaled volatiles using atmospheric pressure*  
43 945 *chemical ionization on a compact mass spectrometer*. Bioanalysis, 2016. **8**(13): p. 1325-36.
- 44 946 81. Lê Cao, K.-A., S. Boitard, and P. Besse, *Sparse PLS discriminant analysis: biologically relevant*  
45 947 *feature selection and graphical displays for multiclass problems*. BMC Bioinformatics, 2011.  
46 948 **12**: p. 253-253.
- 47 949 82. Zou, H., T. Hastie, and R. Tibshirani, *Sparse Principal Component Analysis*. Journal of  
48 950 *Computational and Graphical Statistics*, 2006. **15**(2): p. 265-286.
- 49 951 83. Zou H, H.T., *Regularization and Variable Selection via the Elastic Net*. Journal of the Royal  
50 952 *Statistical Society*, 2005.
- 51  
52  
53  
54  
55  
56  
57 953  
58  
59  
60

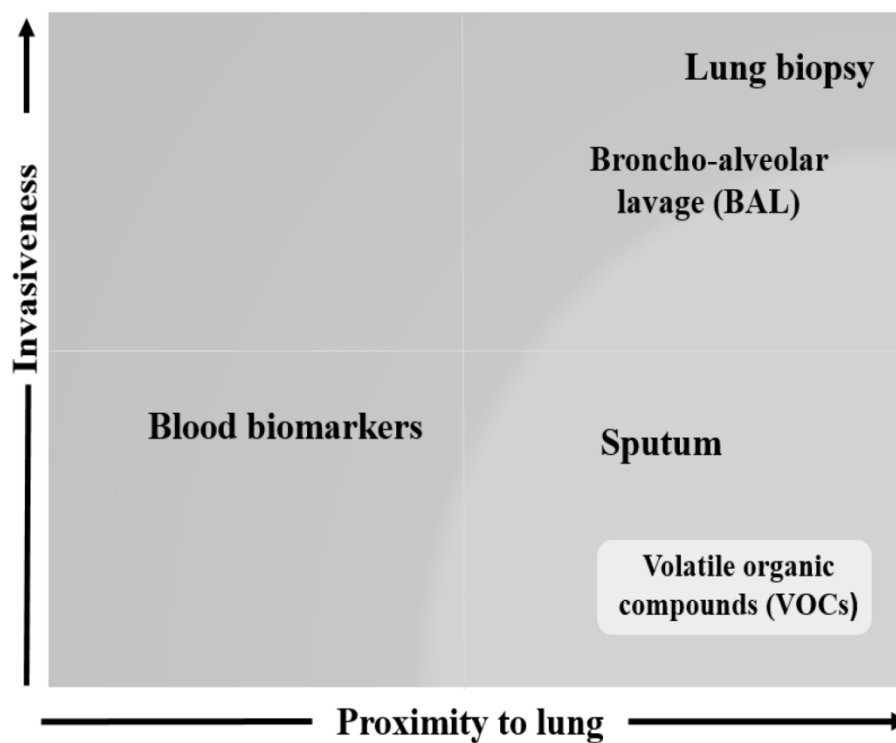

Figure (1): Relationship between lung proximity and degree of invasiveness of different lung matrices. The figure plots the level of invasiveness of various lung matrices in relation to their proximity to the lung. Given their pathological relevance, the degree of invasiveness of bronchoalveolar lavage (BAL) and lung biopsy makes them less favourable in diagnosing respiratory diseases.

144x115mm (300 x 300 DPI)

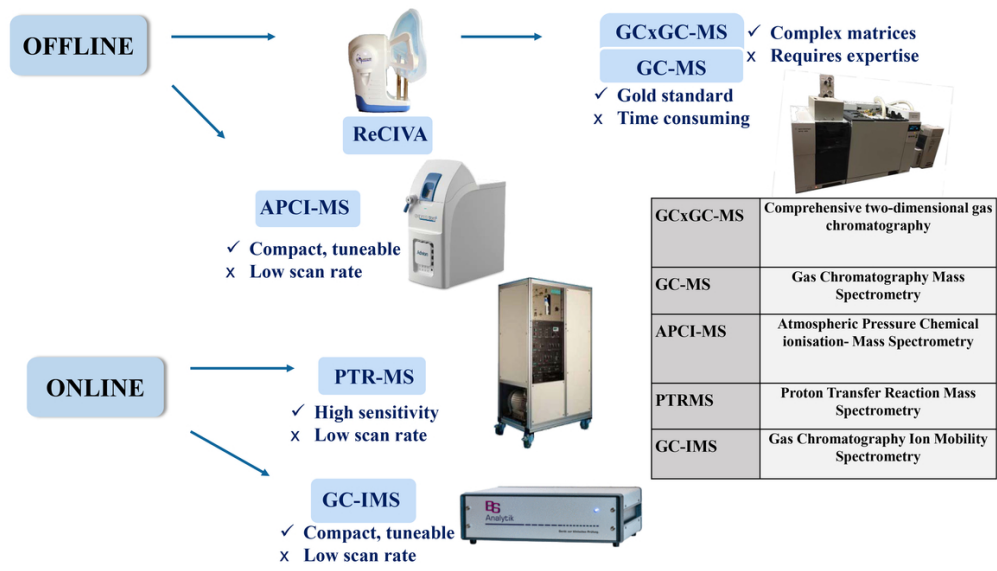

Figure (2): Multi-instrument use in breath sampling. Figure illustrates the various combinations of offline and online devices used in breath sampling and the relevant pros and cons. Offline and online technologies are used for the discovery and validation phases of the study respectively.

97x55mm (300 x 300 DPI)



^ Following senior decision maker review  
 \*\* Breath sampling (ReCIVA-GC-MS, ReCIVA- GCxGC-MS, GC-IMS, APCI-MS)  
 ▲ Breath sampling (ReCIVA-GC-MS, ReCIVA- GCxGC-MS, PTR-MS, APCI-MS)  
 ---- Following University Hospitals of Leicester streaming and clinical care pathways

Figure (3): Study flow chart. Figure outlines the patient journey from admission through to discharge and follow up. Participants with self-reported acute breathlessness presenting to University Hospitals of Leicester are recruited within 24 hours following a senior decision maker review. Breath sampling is carried out on the first visit, at recruitment, and the second visit, up to 6 months after discharge. Patients are admitted through the standard operational emergency medical streaming and care pathways at the University Hospitals of Leicester NHS Trust. Early outcomes (hospital readmission) are measured at 30 and 60 days and late outcomes (mortality) including respiratory and all-cause mortality are measured at 2 years. Assessments carried out at each time point are summarised in Table 1.

86x43mm (300 x 300 DPI)



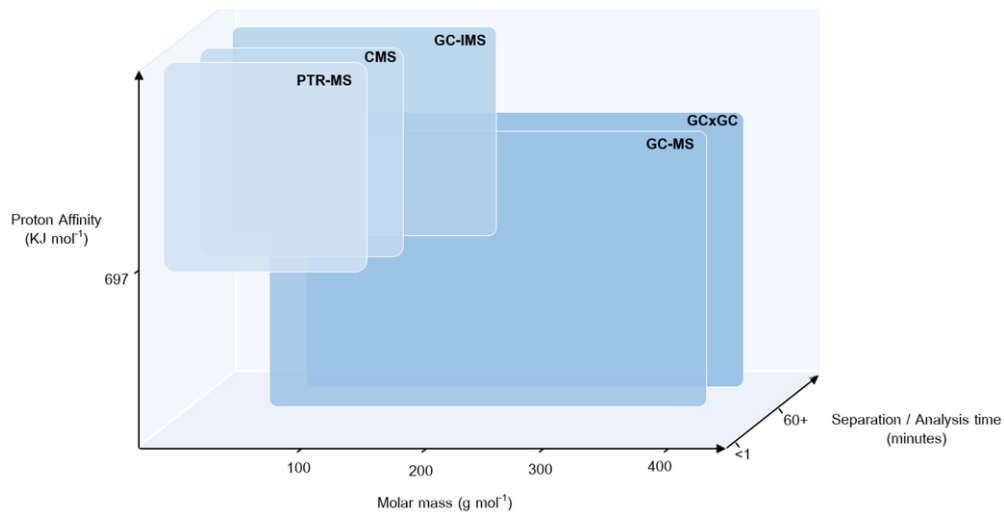

Figure (4): Multi-instrument use in breath sampling. Operational space of the analytical technologies used in EMBER for the analysis of volatile organic compounds (VOC) in exhaled breath, including proton transfer reaction-mass spectrometry (PTR-MS), atmospheric pressure chemical ionisation-mass spectrometry (CMS), gas chromatography-ion mobility spectrometry (GC-IMS), gas chromatography-mass spectrometry (GC-MS) and two-dimensional gas chromatography-mass spectrometry (GCxGC). Comparing the typical molar mass range detectable; selectivity in detection owing to the type of ionisation involved and the proton affinity of analytes; and the inclusion of a chromatographic separation affecting total time of analysis. The online technologies involving chemical ionisation (PTR-MS, CMS and GC-IMS) can be used in-clinic owing to short analysis times, but only detect lower molar mass molecules with a proton affinity higher than 697 KJ mol<sup>-1</sup>. Offline chromatographic techniques (GC-MS and GCxGC) detect a wider range of compounds independent of proton affinity; however, the techniques have longer analysis times and involve sample transportation and storage.

88x44mm (300 x 300 DPI)
